# Supplementary material for: Apple Ripening Is Controlled by a NAC Transcription Factor
Source: Front Genet. 2021 Jun 22;12:671300. doi: 10.3389/fgene.2021.671300 (PMC8258254; doi:10.3389/fgene.2021.671300)
Supplement: Supplementary Figure 1 — Correlations among phenotypes. The distributions of each phenotype are shown as well as dot plots of comparisons between each pair of phenotypes. The results of a Pearson correlation test are provided for each pairwise comparison. [file Data_Sheet_1.zip]

Archive with 35 entries (28 files):
- Supplementary files/
- Supplementary files/Supp Figures/
- Supplementary files/Supp Figures/.DS_Store
- __MACOSX/
- __MACOSX/Supplementary files/
- __MACOSX/Supplementary files/Supp Figures/
- __MACOSX/Supplementary files/Supp Figures/._.DS_Store
- __MACOSX/Supplementary files/Supp Figures/._FigureS1.pdf
- __MACOSX/Supplementary files/Supp Figures/._FigureS2.pdf
- __MACOSX/Supplementary files/Supp Figures/._FigureS3.pdf
- __MACOSX/Supplementary files/Supp Figures/._FigureS4.pdf
- __MACOSX/Supplementary files/Supp Figures/._FigureS5.pdf
- __MACOSX/Supplementary files/Supp Figures/._FigureS6.pdf
- __MACOSX/Supplementary files/Supp Figures/._FigureS7.pdf
- __MACOSX/Supplementary files/._Supp Figures
- Supplementary files/Supp Tables/
- __MACOSX/Supplementary files/Supp Tables/
- __MACOSX/Supplementary files/Supp Tables/._TableS1.xlsx
- __MACOSX/Supplementary files/Supp Tables/._TableS2.csv
- __MACOSX/Supplementary files/Supp Tables/._TableS3.xlsx
- __MACOSX/Supplementary files/Supp Tables/._TableS4.fasta
- __MACOSX/Supplementary files/._Supp Tables
- Supplementary files/Supp Figures/Image 8.pdf
- Supplementary files/Supp Figures/Image 1.pdf
- Supplementary files/Supp Figures/Image 2.pdf
- Supplementary files/Supp Figures/Image 3.pdf
- Supplementary files/Supp Figures/Image 4.pdf
- Supplementary files/Supp Figures/Image 5.pdf
- Supplementary files/Supp Figures/Image 6.pdf
- Supplementary files/Supp Figures/Image 7.pdf
- Supplementary files/Supp Tables/Table 5.xlsx
- Supplementary files/Supp Tables/Table 3.fasta
- Supplementary files/Supp Tables/Table 1.xlsx
- Supplementary files/Supp Tables/Table 2.xlsx
- Supplementary files/Supp Tables/Table 4.xlsx
