# Supplementary material for: Apple Ripening Is Controlled by a NAC Transcription Factor
Source: Front Genet. 2021 Jun 22;12:671300. doi: 10.3389/fgene.2021.671300 (PMC8258254; doi:10.3389/fgene.2021.671300)
Supplement: Supplementary Figure 1 — Correlations among phenotypes. The distributions of each phenotype are shown as well as dot plots of comparisons between each pair of phenotypes. The results of a Pearson correlation test are provided for each pairwise comparison. [file Data_Sheet_1.zip › Supplementary files/Supp Tables/Table 2.xlsx]

## Sheet: TableS2
Apple ID	Cultivar	PG1	ACS1	ACO1	NAC18.1	Firmess at Harvest (kg/cm2)	Softening (%)	Firmness after Storage (kg/cm2)	Harvest Date (Julian Days)
506	Boutteville	GG	ACS1-1	ACO1-1	AC	NA	NA	NA	NA
16	Topaz	GT	ACS1-2	ACO1-1	CC	9.44477	-19.6089	7.59275	281.927
151	KAZ 93-12-02	TT	ACS1-1	ACO1-1	AA	11.5482	-47.286	6.0875	246.927
1015	Orleans	GG	ACS1-2	NA	CC	NA	NA	NA	NA
360	KAS 7	GG	ACS1-1	ACO1-1	CC	9.00077	-57.0237	3.8682	288.927
516	Collet	GT	ACS1-1/2	NA	AC	6.35702	NA	NA	240.336
864	Jewel	GG	ACS1-2	ACO1-1	CC	9.80911	-45.1632	5.379	248.103
1017	Maiden Blush	GG	ACS1-1	ACO1-1	AC	9.74017	-47.5738	5.1064	267.927
873	King of the Pippins	TT	ACS1-1	NA	CC	NA	NA	NA	NA
935	Red Baron	GT	ACS1-1/2	ACO1-1	AC	7.53438	NA	NA	254.913
600	S23-06-133	GG	ACS1-1	ACO1-1	CC	7.80612	-42.8115	4.4642	268.298
435	Bean	GG	ACS1-1/2	ACO1-1	CC	10.8472	NA	NA	275.698
1171	Wealthy	TT	ACS1-1/2	NA	AC	6.34507	-32.9243	4.256	253.795
189	Pink Pearl	GG	ACS1-1/2	ACO1-1	CC	10.574	NA	NA	247.514
1170	Trebu	GG	ACS1-1	ACO1-1	AC	8.61437	-59.7719	3.4654	239.927
1143	Teint Fraise	GT	ACS1-1/2	NA	CC	NA	NA	NA	NA
444	Benoni	GG	ACS1-1/2	ACO1-1	AC	5.60217	-24.1901	4.247	239.927
1176	Suvorovets	TT	ACS1-1	ACO1-1	AC	9.59758	NA	NA	254.194
114	Kaz 95 07-05	GG	ACS1-1	NA	AA	NA	NA	NA	NA
969	Pfirsichroter Sommerapfel	GG	ACS1-1/2	ACO1-1	AA	3.19277	-29.3152	2.2568	232.927
50	8S-29-18	GT	ACS1-2	ACO1-1/2	CC	9.51486	-24.1397	7.218	268.408
1133	Trembletts Bitter	GG	ACS1-2	ACO1-1	CC	9.0199	NA	NA	260.552
269	KAR 93	GG	ACS1-1/2	ACO1-1/2	AC	NA	NA	NA	NA
1173	Sharopa	GG	ACS1-1	ACO1-1	NA	3.50657	NA	NA	260.552
1053	Major	GT	ACS1-1	ACO1-1	CC	7.19278	NA	NA	247.507
49	SPA 283	GT	ACS1-2	ACO1-1/2	CC	9.98672	-8.21411	9.1664	285.174
938	Red Paducah	GT	ACS1-1	ACO1-1/2	CC	9.15272	-42.5023	5.2626	269.101
345	KAR 33	TT	ACS1-1/2	NA	CC	8.39062	-17.9	6.8887	267.674
715	Ellison's Orange	GT	ACS1-1	ACO1-1	AC	9.18218	-33.9089	6.0686	240.698
795	Fireside	TT	ACS1-2	ACO1-1	AC	8.56597	-27.7583	6.1882	267.552
293	KAS 66	TT	ACS1-1/2	ACO1-1	CC	10.8433	-17.6969	8.9244	289.014
560	Champlain	GG	ACS1-1	ACO1-1	AC	5.87822	NA	NA	246.998
901	Geeveston Fanny	GT	ACS1-1	ACO1-1	CC	8.17531	-37.2696	5.1284	268.325
515	Duchess	GT	ACS1-1	ACO1-1	AA	NA	NA	NA	247.745
127	KAZ 96 03-15	GT	ACS1-1	ACO1-1	AC	6.36277	-52.9513	2.9936	246.552
483	Baumann's Reinette	TT	ACS1-1/2	ACO1-1	CC	10.3573	-32.8704	6.9528	268.745
252	Pionier	GT	ACS1-1/2	ACO1-2	CC	8.34156	NA	NA	271.281
1207	Sweet Caroline	GG	ACS1-1	ACO1-1	CC	7.38157	-53.2322	3.4522	261.102
761	Gros Frequin	GT	ACS1-1	ACO1-1	CC	10.7419	NA	NA	253.939
458	Antonovka Ottawa	GG	ACS1-1	ACO1-1	AC	7.64272	-26.7774	5.5962	282.074
1263	Kaz 95 18-02P-33	GG	ACS1-1	ACO1-1	AC	11.6504	-35.3445	7.5326	245.137
119	KAZ 96 03-01P-7	GT	ACS1-1	NA	AA	NA	NA	NA	NA
745	Gruzhovka of Moscow	GT	ACS1-1	ACO1-1/2	CC	9.28887	NA	NA	285.551
559	Adersleber Kalvill	GT	ACS1-1/2	ACO1-1	CC	8.56955	NA	NA	274.76
309	KAS 54	GT	ACS1-1/2	ACO1-1	CC	8.91717	NA	NA	246.403
554	Auralia	GT	ACS1-1/2	ACO1-1	CC	8.88837	-40.0227	5.331	281.403
77	NY74828	GG	ACS1-1	ACO1-1/2	CC	8.50392	-53.2804	3.973	257.974
536	Drap d'Or Guemene	GT	ACS1-1	ACO1-1	CC	NA	NA	NA	NA
217	KAZ 96 08-16	GG	ACS1-1	ACO1-1	AC	6.65624	-38.6771	4.0818	267.864
24	Britegold	GT	ACS1-1/2	ACO1-1	CC	9.03743	-50.8754	4.4396	264.489
491	Carlton	GG	ACS1-1/2	ACO1-1	AC	NA	NA	NA	NA
349	KAR 15	GG	ACS1-1	ACO1-1	AC	7.71664	NA	NA	243.44
760	King	TT	ACS1-1/2	NA	CC	11.1869	-44.1365	6.2494	269.103
550	Binet Blanc	TT	ACS1-1/2	ACO1-1	CC	10.8243	-18.903	8.7782	267.582
1261	Kaz 95 18-02P-31	GT	ACS1-1	NA	AA	NA	NA	NA	NA
981	Prairie Spy	TT	ACS1-1/2	NA	AC	8.06236	NA	NA	278.206
158	Crimson Beauty	GG	ACS1-1/2	ACO1-1	AA	2.73117	NA	NA	225.403
99	Egremont Russet	GT	ACS1-1	NA	CC	10.4316	-43.5391	5.8898	288.864
1296	KAZ 96 09-02	GT	ACS1-1	NA	CC	10.764	NA	NA	282.651
1223	Honeycrisp	TT	ACS1-1/2	ACO1-1	CC	8.2217	3.74981	8.53	255.959
668	S31-04-41	GG	ACS1-1	ACO1-1/2	AC	6.46177	NA	NA	246.861
524	Dulcina	GT	ACS1-1	ACO1-1	CC	10.8678	-24.9929	8.1516	267.927
494	Blanc Mollet	GG	ACS1-1	ACO1-1	AC	6.04047	-15.0464	5.1316	247.444
227	Esopus Spitzenburg	TT	ACS1-1/2	ACO1-1/2	CC	10.9826	-44.7197	6.0712	274.927
771	Frumos de Voinesta	GT	ACS1-1/2	ACO1-1/2	CC	9.64402	-58.5277	3.9996	257.504
457	Early Crimson	GG	ACS1-1	ACO1-1	AC	NA	NA	NA	NA
582	S28-18-36	GT	ACS1-2	ACO1-1	CC	8.89911	-35.5486	5.7356	269.103
726	Lombart's Calville	GT	ACS1-1/2	ACO1-1	CC	8.74707	NA	NA	281.795
740	Grenadier	GT	ACS1-1/2	ACO1-1	CC	NA	NA	NA	NA
408	Clear Heart	GG	ACS1-1	ACO1-1/2	CC	8.21777	-47.9299	4.279	253.927
995	Mantet	GG	ACS1-1/2	ACO1-1	AA	NA	NA	NA	NA
246	Buckeye Gala	GT	ACS1-2	ACO1-1/2	CC	9.73077	-25.8743	7.213	260.927
857	Heiya	GT	ACS1-1/2	ACO1-1/2	CC	8.16297	NA	NA	267.927
1018	Redstreak	GG	ACS1-1/2	ACO1-1	AC	NA	NA	NA	NA
768	Frequin	GT	ACS1-1	ACO1-1	CC	NA	NA	NA	NA
475	Chiver's Delight	GT	ACS1-1/2	ACO1-1	CC	NA	NA	NA	NA
530	Berlepsch Red	GT	ACS1-1/2	ACO1-1/2	CC	10.44	-41.7776	6.0784	260.927
621	S42-39-10	GG	ACS1-1	NA	AC	7.90597	-47.3512	4.1624	246.927
162	Antonovka Kamenichka	GT	ACS1-1	NA	CC	NA	NA	NA	NA
1216	Ambrosia	GG	ACS1-2	ACO1-1/2	CC	9.11699	-7.33934	8.44787	276.86
341	KAS 8	GG	ACS1-1	ACO1-1	AC	7.58577	-47.6942	3.9678	232.552
163	Koningszuur	TT	ACS1-1	ACO1-1	CC	NA	NA	NA	NA
28	Macfree	GT	ACS1-1	ACO1-1	CC	9.36922	-44.9602	5.1568	271.317
216	Gravenstein Washington Red	GT	ACS1-1	ACO1-1	NA	7.52324	NA	NA	250.386
731	Launette	GT	ACS1-1/2	ACO1-1	CC	8.65077	-26.1684	6.387	267.552
174	Antonovka 1.5 pounds	GT	ACS1-1	ACO1-1	AC	8.90512	NA	NA	250.395
1154	Souvenir de Fernand Cognet	GG	ACS1-1	ACO1-1	CC	8.80414	-29.49	6.2078	271.828
1078	Mottais	GG	ACS1-1	ACO1-1	AC	10.7931	NA	NA	260.795
67	Elstar	GT	ACS1-2	ACO1-1	CC	7.23368	-45.5492	3.9388	263.444
123	KAZ 96 02-01P-6	GT	ACS1-1	ACO1-1	AA	NA	NA	NA	NA
1198	Toko	GT	ACS1-1/2	ACO1-1	CC	9.48094	NA	NA	285.828
876	Lane's Prince Albert	GT	ACS1-1/2	ACO1-1	CC	9.17217	-45.206	5.0258	260.552
849	Lamb Abbey Pearmain-A	GT	ACS1-1/2	ACO1-1	AC	8.71217	-42.8799	4.9764	260.552
989	Roxbury Russet	GT	ACS1-1	NA	CC	10.3793	NA	NA	282.149
NA	NA	NA	NA	NA	NA	NA	NA	NA	NA
561	Bonne-Hotture	GT	ACS1-1	ACO1-1	CC	NA	NA	NA	NA
279	KAS 65	TT	ACS1-1/2	ACO1-1	CC	8.32162	NA	NA	281.885
712	Hawkeye	GT	ACS1-1/2	ACO1-2	CC	8.12752	NA	NA	281.817
22	Voinea	GG	ACS1-1/2	ACO1-1	CC	10.1161	-45.1329	5.5504	257.373
1085	Medina	GT	ACS1-2	NA	CC	8.89217	-42.4055	5.1214	288.552
84	Murray	GT	ACS1-1	NA	CC	8.82597	-42.463	5.0782	288.403
574	Blue Pearmain	TT	ACS1-1/2	ACO1-1	CC	8.92107	-46.8001	4.746	275.23
242	Tsugaru	TT	ACS1-1/2	ACO1-1	CC	7.01837	-43.3686	3.9746	250.489
521	Doucet Rouge	GT	ACS1-1	ACO1-1	CC	8.08977	-37.2615	5.0754	281.403
136	Northern Spy	GG	ACS1-1	NA	CC	NA	NA	NA	NA
149	KAZ 93-24-01	TT	ACS1-1	NA	AA	8.00377	-34.3934	5.251	236.167
1013	Old Pearmain	GT	ACS1-1/2	ACO1-1	CC	NA	NA	NA	NA
169	Summerred	GG	ACS1-1/2	ACO1-1	AC	7.43012	-50.4315	3.683	240.474
964	Miron Sacharanij	GG	ACS1-1	ACO1-1	NA	1.98511	NA	NA	240.194
997	Renet Bergamotnyj	GT	ACS1-1	ACO1-1	CC	8.47591	-36.9507	5.344	275.325
757	Frogmore	GT	ACS1-1/2	ACO1-1	CC	8.45718	NA	NA	254.651
601	S23-05-01	GG	ACS1-1	ACO1-1	CC	8.22837	NA	NA	246.403
977	Manitoba Spy	GG	ACS1-1	ACO1-1	AC	7.76877	-43.1493	4.4166	267.403
564	Cole	GT	ACS1-1/2	ACO1-1/2	CC	7.89222	NA	NA	271.311
405	Belle de Nordhaussen	TT	ACS1-1/2	ACO1-1	CC	NA	NA	NA	NA
1254	Kaz 95 08-06	GG	ACS1-1	ACO1-1	AC	7.36028	NA	NA	253.76
204	Anna	GG	ACS1-1/2	ACO1-1	AC	6.77597	-38.7209	4.15225	257.752
63	Aroma	GG	ACS1-1/2	ACO1-1	CC	7.92701	NA	NA	253.706
882	Katja	GG	ACS1-1/2	ACO1-1	CC	7.41265	-39.3807	4.4935	243.659
1264	Kaz 95 18-02P-33	GG	ACS1-1	ACO1-1	AA	5.91903	NA	NA	246.573
113	Kaz 95 18-11	GT	ACS1-1	ACO1-1	AA	7.32703	NA	NA	246.573
1225	KAR 29	GT	ACS1-1	ACO1-1	AC	6.96513	NA	NA	246.901
507	Bella de Jardins	GG	ACS1-2	ACO1-1	CC	7.25881	-44.5611	4.0242	257.384
1088	Quindell	GG	ACS1-2	NA	CC	7.7927	NA	NA	281.573
391	Blauacher	GT	ACS1-1	ACO1-1	CC	10.7837	NA	NA	281.795
804	Loop Giant Spy	GG	ACS1-1	ACO1-1	CC	NA	NA	NA	NA
11	Rouville	GG	ACS1-1/2	ACO1-1	AC	6.10876	-51.4795	2.964	247.074
1086	Pomme Grise	GT	ACS1-1	ACO1-1	CC	10.3197	-47.0216	5.4672	268.444
465	Coat Jersey	GT	ACS1-1	ACO1-1/2	CC	NA	NA	NA	NA
1146	Sharon	GG	ACS1-1	ACO1-1	CC	8.43243	-37.5127	5.2692	267.573
377	Ballyfatten	TT	ACS1-1/2	ACO1-1	CC	10.0944	-30.5334	7.0122	254.009
739	Honeygold	GT	ACS1-2	ACO1-1	CC	8.24556	-29.0139	5.8532	264.869
705	King Harry	GG	ACS1-1	ACO1-1	CC	NA	NA	NA	NA
12	Moira	GT	ACS1-1/2	ACO1-1/2	CC	8.34205	-49.5616	4.2076	271.509
94	S47-20-037	GT	ACS1-1	ACO1-1	AC	8.03551	-38.6822	4.9272	247.477
150	James Grieve (Red Rosamund strain)	GG	ACS1-1	ACO1-1	CC	7.51571	-52.888	3.5408	236.384
714	Gewurzluiken	GT	ACS1-1	ACO1-1	CC	9.45756	-33.9581	6.24595	268.559
1049	Magnolia Gold	GG	ACS1-1	ACO1-1	CC	NA	NA	NA	NA
455	Caillouett	TT	ACS1-1	ACO1-1	CC	NA	NA	NA	NA
941	Reinette do Chenee	GT	ACS1-1	ACO1-1	CC	NA	NA	NA	NA
70	Blackmac	GG	ACS1-1	ACO1-1	CC	7.81946	-49.9096	3.9168	246.742
517	Barry	GG	ACS1-1/2	ACO1-1	CC	NA	NA	NA	NA
932	Paulista	TT	ACS1-1	ACO1-1	CC	8.13735	-32.6144	5.4834	254.279
473	Crimson King	GT	ACS1-1	ACO1-1	NA	NA	NA	NA	NA
54	8S-26-52	TT	ACS1-2	ACO1-1/2	CC	NA	NA	NA	NA
484	Camuzat	GT	ACS1-1	ACO1-1/2	CC	8.98783	NA	NA	281.264
376	Early Bird Red	GG	ACS1-1/2	ACO1-1	AA	2.69018	NA	NA	226.183
936	Ranger	GG	ACS1-1/2	ACO1-1	AC	NA	NA	NA	NA
467	Doux Tardif	GT	ACS1-1	ACO1-1	CC	NA	NA	NA	NA
1119	Quastresse	GT	ACS1-1	ACO1-1	CC	NA	NA	NA	NA
717	Garrison	TT	ACS1-1	ACO1-1/2	AC	7.41298	NA	NA	250.683
316	KAR 82	GG	ACS1-1/2	ACO1-1	CC	10.8224	-45.5405	5.8938	261.187
905	Geneva Ontario	GG	ACS1-1	ACO1-1	CC	NA	NA	NA	NA
361	KAR 31	GG	ACS1-1	ACO1-1	CC	7.80161	NA	NA	251.274
861	Lemon Pippin	GG	ACS1-1/2	ACO1-1	CC	10.2326	NA	NA	274.264
870	Langworthy	GG	ACS1-1	ACO1-1	CC	NA	NA	NA	NA
128	Kaz 95 07-02	GG	ACS1-1	NA	AA	6.37688	NA	NA	226.183
396	Crow Egg	GT	ACS1-1	ACO1-1	CC	7.88343	-49.6793	3.967	274.279
1058	Peck Pleasant	GT	ACS1-1	ACO1-1	CC	NA	NA	NA	NA
192	Surprise	GT	ACS1-1	ACO1-1	NA	8.10143	-43.0718	4.612	253.279
260	KAS 60	GG	ACS1-1/2	ACO1-1/2	CC	7.91335	-27.3405	5.7498	282.009
1229	Macoun	GG	ACS1-1	ACO1-1	CC	8.95178	NA	NA	254.194
1278	KAZ 96 01-01P-20	GG	ACS1-1	ACO1-1	AC	11.0875	NA	NA	243.25
841	Kinsei	TT	ACS1-2	ACO1-1/2	CC	9.60696	-12.1553	8.4392	278.912
1063	Reinette Thouin	TT	ACS1-1	ACO1-1/2	CC	8.93903	-29.1422	6.334	274.279
1125	Reinette van Ekenstein	GG	ACS1-1	ACO1-1	NA	7.72809	-34.2593	5.0805	253.644
1106	Red Spitzenburg	TT	ACS1-1/2	ACO1-1/2	CC	9.04351	-44.3181	5.0356	275.325
986	Minnehaha	GT	ACS1-1/2	ACO1-1	AC	8.91731	-41.4644	5.2198	255.103
879	Gallen	GT	ACS1-1	ACO1-1	AA	3.53915	NA	NA	227.263
1014	Paide's Winter Apple	GT	ACS1-1	NA	AA	8.28763	NA	NA	260.279
1226	KAS 47	GG	ACS1-1/2	ACO1-1/2	CC	8.57029	NA	NA	257.771
912	Fenouillet Gris	GT	ACS1-1	ACO1-1	CC	NA	NA	NA	NA
1105	Reinette Jaeghers	GT	ACS1-1/2	NA	CC	9.14532	NA	NA	269.11
1209	Shawnee	GT	ACS1-1	ACO1-1/2	CC	8.56152	-42.4098	4.9306	254.298
1177	Slocan	GG	ACS1-1	NA	AC	8.50332	NA	NA	247.298
562	Bramley	GT	ACS1-1/2	NA	CC	NA	NA	NA	NA
1280	KAZ 96 02-01P-11	GG	ACS1-1	ACO1-1	AA	8.47714	NA	NA	243.397
460	Akero	GG	ACS1-1	ACO1-1	AC	9.96435	NA	NA	240.279
788	Fallawater	GG	ACS1-1/2	ACO1-1	CC	11.374	-40.9339	6.7182	274.573
975	Redwell	GT	ACS1-1/2	ACO1-1	CC	6.76361	NA	NA	268.112
551	Cimitiere	GT	ACS1-1	NA	CC	9.54165	NA	NA	268.341
327	KAR 35	TT	ACS1-1	ACO1-1	CC	NA	NA	NA	NA
175	GMAL 3158	GG	ACS1-1	ACO1-1	AC	7.36134	-22.3022	5.7196	247.025
301	KAR 107	TT	ACS1-1/2	ACO1-1	AC	7.22403	NA	NA	253.573
923	Richland Crab	GT	ACS1-1/2	ACO1-1	AC	7.42719	NA	NA	239.926
31	Fantazja	GT	ACS1-1/2	ACO1-1	CC	6.93916	-51.8558	3.3408	250.167
1039	Maunerbe	TT	ACS1-1/2	ACO1-1	CC	NA	NA	NA	NA
1100	Red Australian Rome Beauty	GG	ACS1-1/2	ACO1-1	CC	9.59808	-37.9022	5.9602	288.76
105	KAZ 96 06-01P-23	GT	ACS1-1	ACO1-1	AA	4.53043	NA	NA	232.573
79	Novamac	GG	ACS1-1	ACO1-1	CC	7.40691	-47.9999	3.8516	254.112
291	KAS 68	GG	ACS1-1	NA	AC	6.88327	-50.0746	3.4365	233.745
724	Frostproof	GT	ACS1-1	NA	CC	10.093	NA	NA	278.384
581	Kent VI	GG	ACS1-1/2	ACO1-1	CC	7.96603	-11.0021	7.0896	288.573
139	Nova Easygro	GG	ACS1-1	ACO1-1/2	CC	NA	NA	NA	NA
1206	Tayeshnoe	GT	ACS1-1	ACO1-1	AC	8.42411	NA	NA	250.252
1082	Paulared	GT	ACS1-1	ACO1-1	AC	7.11836	NA	NA	243.012
787	Kanorkowa	TT	ACS1-1/2	ACO1-1/2	CC	11.0094	-49.9916	5.5056	274.53
590	Suntan	GT	ACS1-1/2	ACO1-1	CC	9.10236	-20.7041	7.2178	278.905
953	Patul	GG	ACS1-1	ACO1-1	CC	8.53452	-33.5053	5.675	268.22
831	Jewett Red	GT	ACS1-1/2	ACO1-1/2	CC	7.98155	-28.9637	5.6698	275.009
142	Lady	GG	ACS1-1	ACO1-1	CC	NA	NA	NA	NA
214	Ingol	GG	ACS1-1	NA	CC	7.75675	-34.9685	5.04433	275.279
669	Ottawa 637	GT	ACS1-1	ACO1-1/2	CC	6.46243	-47.0633	3.421	274.264
100	Bittenfelder S	GG	ACS1-1	ACO1-1	CC	12.0446	-43.261	6.834	285.837
679	S38-03-89	GT	ACS1-1	ACO1-1	AC	5.93559	NA	NA	243.715
569	Bella di Pontoise	GG	ACS1-1	ACO1-1	CC	11.0731	NA	NA	289.23
853	Komlensk	TT	ACS1-1/2	ACO1-1	AA	6.38711	NA	NA	241.103
193	GMAL 3163	GT	ACS1-1	ACO1-1	AA	NA	NA	NA	NA
944	Quinte	GG	ACS1-1	ACO1-1	AC	NA	NA	NA	NA
913	Loyalist	GT	ACS1-1/2	NA	CC	8.86396	-11.0758	7.8822	274.92
808	Jonalicious	GG	ACS1-1/2	ACO1-1/2	CC	7.37523	-14.8339	6.2812	260.264
1093	Mio	GG	ACS1-1	ACO1-1	AC	4.07852	-31.3673	2.7992	247.22
96	Reinet Russet	TT	ACS1-1	NA	CC	7.44911	-34.8271	4.8548	275.325
996	Rokewood	GT	ACS1-1/2	ACO1-1	CC	NA	NA	NA	NA
51	Maigold	GT	ACS1-1/2	ACO1-1	CC	NA	NA	NA	NA
120	Kaz 95 08-04	GT	ACS1-1	ACO1-1	AC	9.22866	-40.8668	5.4572	250.02
441	Brown's Apple	GT	ACS1-1/2	ACO1-1	AC	NA	NA	NA	NA
369	Dudley	GT	ACS1-1/2	ACO1-1	AC	7.08943	-44.4525	3.938	253.279
952	Novinka	TT	ACS1-2	NA	CC	9.32531	-47.399	4.9052	285.489
178	Casa Nova de Alco Baca-9	GT	ACS1-1	NA	CC	9.26245	-47.3077	4.8806	267.754
900	George Cave	GG	ACS1-1/2	ACO1-1	AC	5.28863	-31.1429	3.6416	239.279
122	KAZ 96 08-01P-11	TT	ACS1-1	ACO1-1	AC	7.92703	-48.0688	4.1166	246.279
413	Discovery	GT	ACS1-2	ACO1-1	AC	6.25523	NA	NA	239.279
8	Dayton	GG	ACS1-1	ACO1-1	CC	5.55036	NA	NA	264.02
781	Holaart Doux	GT	ACS1-1	ACO1-1	CC	8.28503	NA	NA	267.279
284	KAR 96	GT	ACS1-1	ACO1-1	AC	5.91827	NA	NA	236.691
1011	Reinette Grise	GT	ACS1-1	ACO1-1	CC	10.0584	-18.2596	8.2218	288.279
1064	Oetwiler Renette	GT	ACS1-1/2	ACO1-2	CC	8.05145	-18.2781	6.5798	285.512
245	Akane	GT	ACS1-2	ACO1-1	CC	7.87183	-44.0105	4.4074	249.931
425	Berglander	GT	ACS1-1	ACO1-1	CC	8.55671	-30.1795	5.97433	275.477
959	Qing Guan	GT	ACS1-1	ACO1-1	CC	9.11971	-45.268	4.9914	281.965
449	Delikates	GG	ACS1-1	ACO1-1	CC	8.10363	NA	NA	239.279
235	Pink Lady	TT	ACS1-1/2	ACO1-1	CC	NA	NA	NA	NA
1288	KAZ 96 07-07	GT	ACS1-1	ACO1-1/2	AA	7.40266	-57.5152	3.145	240.206
571	Amelia	GG	ACS1-1/2	NA	CC	8.00877	-43.0924	4.5576	272.185
62	Redfree	GG	ACS1-1	ACO1-1	AC	7.39269	NA	NA	247.252
1102	Malling Kent	GG	ACS1-1/2	ACO1-1	CC	8.00146	-13.6751	6.90725	282.206
1046	Pommier Llorca	TT	ACS1-1	ACO1-1	AA	6.17592	NA	NA	240.298
283	KAS 63	GT	ACS1-1/2	ACO1-1	CC	6.97312	-27.7339	5.0392	269.101
147	KAZ 96 06-03	GG	ACS1-1	ACO1-1	AA	6.76536	NA	NA	240
702	Holland	GG	ACS1-1	NA	AC	6.80273	-47.6093	3.564	257.718
30	Richelieu	GT	ACS1-1/2	ACO1-1	CC	6.88856	-54.2169	3.1538	254.658
124	KAZ 96 06-01P-26	GT	ACS1-1	ACO1-1	AA	9.82366	-37.4774	6.142	247.206
436	American Forestier	GT	ACS1-1	ACO1-1	CC	10.6665	-51.3787	5.1862	289.22
662	S16-06-72	GT	ACS1-1	ACO1-1	AC	7.98796	-46.6147	4.2644	250.5
767	Livadiyskoye	TT	ACS1-1/2	ACO1-1	CC	NA	NA	NA	NA
1140	Stafford	GG	ACS1-1/2	ACO1-1	AC	8.29651	NA	NA	247.658
782	Harcourt	GT	ACS1-1	NA	AA	6.37507	NA	NA	232.795
1010	Metais	GG	ACS1-1	ACO1-1	NA	NA	NA	NA	NA
541	Arkad Zimnyi	GG	ACS1-1	ACO1-1	AC	NA	NA	NA	NA
1228	Macoun	GG	ACS1-1	ACO1-1	CC	8.94464	NA	NA	257.295
630	S47-25-05	GG	ACS1-1	ACO1-1	AC	6.09435	NA	NA	241.263
41	SJC 649	GG	ACS1-1	ACO1-1	CC	10.1355	-46.2264	5.4502	253.777
1246	Kaz 95 05-01P-5	GG	ACS1-1	ACO1-1	AA	4.19332	NA	NA	253.777
329	KAR 52	GG	ACS1-1	ACO1-1	CC	8.81496	-39.6299	5.3216	278.503
317	KAR 98	GG	ACS1-1/2	ACO1-1	CC	9.1451	NA	NA	264.528
1122	Melon	GG	ACS1-1/2	ACO1-1/2	CC	NA	NA	NA	NA
949	Malinda	TT	ACS1-2	ACO1-1	CC	9.77726	-44.3116	5.4448	274.777
1016	Monmouth Beauty	GG	ACS1-1/2	ACO1-1	CC	7.34934	NA	NA	243.738
802	Hendrick Sweet	GG	ACS1-1	ACO1-1	CC	8.11696	NA	NA	282.261
672	S38-03-25	GT	ACS1-1/2	ACO1-1	AC	NA	NA	NA	NA
1162	Zimnieje Piervoskhodnoie	TT	ACS1-1/2	ACO1-1	NA	7.27441	NA	NA	281.777
398	Carroll	GG	ACS1-1	ACO1-1	AC	5.93347	-66.5929	1.9822	240.082
737	Greendale	GG	ACS1-1	NA	AC	NA	NA	NA	NA
165	Oelsen 2 x Hartmann-Muhle 1	TT	ACS1-1/2	ACO1-1	CC	NA	NA	NA	NA
968	Regent	GT	ACS1-1/2	ACO1-1	CC	8.36158	NA	NA	275.913
102	Kaz 95 05-01P-26	GG	ACS1-1	NA	AA	11.9675	NA	NA	240.298
1032	Nanny	GT	ACS1-1	ACO1-1	CC	6.61576	NA	NA	257.61
806	Honey Ball	GG	ACS1-1	ACO1-1	AC	NA	NA	NA	NA
1199	Stahls Prinz	GT	ACS1-1/2	ACO1-1	CC	10.0965	NA	NA	254.237
565	Brunnsapple	GG	ACS1-1	ACO1-1/2	CC	NA	NA	NA	NA
919	Rouge Belle de Boskoop	GT	ACS1-1	ACO1-1	CC	9.74617	NA	NA	284.978
101	KAZ 96 03-11	GG	ACS1-1	ACO1-1	AA	NA	NA	NA	NA
134	Cortland	GG	ACS1-1	ACO1-1	CC	7.80168	NA	NA	267.607
1115	Narjadnoye Crysmskoye	GG	ACS1-1/2	ACO1-1/2	CC	10.8473	NA	NA	266.736
755	Karmijn	GT	ACS1-1/2	ACO1-1	CC	8.31957	-45.6582	4.521	264.641
678	S38-04-11	GT	ACS1-1	ACO1-1	CC	6.74617	NA	NA	249.748
843	Erwin Bauer	GT	ACS1-1	ACO1-1	NA	NA	NA	NA	NA
982	Reid's Seedling	GG	ACS1-1	NA	AC	5.13926	-39.8356	3.092	245.736
686	S10-13-28	GG	ACS1-1	ACO1-1	CC	NA	NA	NA	NA
682	S19-33-04	GG	ACS1-1	NA	AC	5.37406	NA	NA	249.766
393	Directeur Lesage	GT	ACS1-1	ACO1-1	AC	5.62777	NA	NA	243.641
346	KAR 38	GG	ACS1-1	ACO1-1	CC	8.88658	-49.2336	4.5114	260.607
155	Baldwin	GT	ACS1-1/2	NA	CC	NA	NA	NA	NA
191	Burgundy	GT	ACS1-1/2	ACO1-1	AC	7.64697	-49.5853	3.8552	253.656
297	KAS 79	GT	ACS1-1/2	ACO1-1	CC	7.75687	-33.2153	5.1804	285.156
1097	Oratia Beauty	GT	ACS1-1	ACO1-1	NA	NA	NA	NA	NA
1158	Tasty	TT	ACS1-1	ACO1-1	AA	8.80418	NA	NA	226.194
899	Kosmonaut	GG	ACS1-1	ACO1-1	CC	6.60158	NA	NA	260.531
793	Kandil Sinap	GG	ACS1-1	ACO1-1	NA	8.50472	-25.5637	6.3306	275.068
302	KAR 85	GT	ACS1-1	ACO1-1	NA	6.6672	NA	NA	240.734
1219	Gloster 69	GG	ACS1-2	NA	CC	NA	NA	NA	NA
1001	Maharaji	TT	ACS1-1/2	ACO1-1	CC	NA	NA	NA	NA
1048	Red Cox's Pomona	GG	ACS1-1/2	ACO1-1	CC	6.71606	-44.5716	3.7226	247.206
1252	Kaz 95 08-01	GG	ACS1-1	NA	AA	9.88466	NA	NA	233.206
305	KAR 95	GT	ACS1-1/2	ACO1-1/2	CC	11.4731	-51.5229	5.5618	254.206
834	June Wealthy	GT	ACS1-1/2	NA	AA	NA	NA	NA	NA
208	Rosemary Russet	GG	ACS1-1	ACO1-1	CC	NA	NA	NA	NA
365	Circassian Apple	GT	ACS1-1	NA	CC	11.7936	NA	NA	282.651
765	Hudson's Golden Gem	GG	ACS1-1	ACO1-1	CC	11.4509	-50.3741	5.6826	275.082
437	Boiken	GT	ACS1-1/2	ACO1-1	CC	9.18852	-45.2099	5.0344	289.559
1268	Kaz 95 18-03	GG	ACS1-1	ACO1-1	CC	14.0122	-39.7611	8.4408	259.372
756	Erickson	GT	ACS1-1	ACO1-1	AC	4.62261	NA	NA	249.779
1062	Rossoshanskoje Polosatoje	GG	ACS1-1	ACO1-1	CC	11.0915	NA	NA	254.206
752	Hua Guan	TT	ACS1-2	ACO1-1/2	CC	8.32859	-5.24444	7.8918	285.713
780	Goodland	GG	ACS1-1	ACO1-1	AC	5.87486	-41.3875	3.4434	247.206
1302	Niedzwetzkyana	GG	ACS1-1	ACO1-1	CC	10.0615	-45.98	5.4352	247.206
821	Ingram	GG	ACS1-1/2	ACO1-1	CC	11.6276	-28.1698	8.3521	282
401	Arkansas Black	GG	ACS1-1	ACO1-1	CC	NA	NA	NA	NA
785	Isle of Wight Pippin	GT	ACS1-1/2	ACO1-1	CC	NA	NA	NA	NA
238	Chinook	TT	ACS1-2	ACO1-1	CC	10.4541	-15.7801	8.8044	278.429
1242	Kaz 95 05-01P-22	GG	ACS1-1	ACO1-1	AA	9.74358	NA	NA	233.194
33	Supermac	GG	ACS1-1	ACO1-1	CC	9.10006	-40.7339	5.39325	267.777
742	Golden Reinette	GT	ACS1-1	ACO1-1	CC	7.23392	-47.8107	3.77533	282.22
181	Viking	GG	ACS1-1	ACO1-1	AC	5.98675	-53.965	2.756	234.263
909	King Edward VII	GG	ACS1-1/2	NA	CC	9.32656	-49.2975	4.7288	289.11
109	Kaz 95 06-01	GG	ACS1-1	NA	AA	6.13698	NA	NA	239.931
1186	San Juan	GT	ACS1-1/2	ACO1-1	AA	NA	NA	NA	NA
966	Mislimka	GT	ACS1-1	ACO1-1	CC	9.60016	-39.7469	5.7844	261.261
916	Morden 363	GT	ACS1-1/2	ACO1-1	AC	6.03175	NA	NA	242.289
1118	Norda	TT	ACS1-1/2	ACO1-1/2	AC	8.29157	NA	NA	239.768
97	INR 6690	TT	ACS1-1/2	ACO1-1	CC	8.08926	-31.4375	5.5462	278.286
1067	Ortley	GT	ACS1-1/2	ACO1-1	CC	NA	NA	NA	NA
854	Golden Precoce	GT	ACS1-1/2	ACO1-1	CC	7.78762	-29.6267	5.4804	278.738
754	Korei	GT	ACS1-1/2	ACO1-1/2	CC	9.2816	-24.9957	6.9616	286.02
403	Black Ben Davis	GG	ACS1-1	ACO1-1	CC	9.74677	-14.0269	8.3796	282.661
289	KAR 112	GT	ACS1-1/2	ACO1-1	CC	8.10292	-43.2106	4.6016	268.214
674	S42-40-09	GG	ACS1-1	ACO1-1	AC	6.03986	NA	NA	259.736
229	Prime Red	GT	ACS1-2	ACO1-1	CC	7.91782	NA	NA	249.834
442	Charlamoff	GT	ACS1-1	ACO1-1	AA	5.12338	NA	NA	239.531
324	KAR 111	GT	ACS1-1/2	ACO1-1	CC	7.90162	-40.2603	4.7204	270.748
673	S38-04-01	GT	ACS1-1	ACO1-1	CC	7.31274	NA	NA	256.978
198	Winter Banana	GG	ACS1-1/2	ACO1-1	AC	10.3023	-52.1813	4.9264	263.983
542	Del Cirio	GT	ACS1-1	NA	CC	11.7822	NA	NA	273.736
531	C'Huero Biz Bras	GG	ACS1-1	ACO1-1	CC	NA	NA	NA	NA
1213	Sparreholm	GT	ACS1-1	ACO1-1	AA	6.19742	NA	NA	232.465
186	Pacific Gold	GG	ACS1-1/2	ACO1-1	CC	6.98907	-38.939	4.2676	282.23
828	Lord Seedling	GG	ACS1-1/2	ACO1-1	AC	9.19738	NA	NA	247.507
1052	Pott's Seedling	GT	ACS1-1/2	ACO1-1	CC	8.82912	-42.633	5.065	277.965
132	KAZ 96 01-03	GG	ACS1-1	ACO1-1	AA	7.46779	NA	NA	246.478
1227	KAS 67	TT	ACS1-1	ACO1-1	AC	6.65832	7.31234	7.1452	247.298
275	KAS 57	GT	ACS1-1	ACO1-1/2	CC	6.96286	NA	NA	245.736
318	KAR 108	TT	ACS1-1/2	ACO1-1	CC	8.44779	NA	NA	249.978
933	Northwood	GG	ACS1-1	ACO1-1	AC	9.17586	-30.3825	6.388	266.736
1139	Surpasse Frequin	GT	ACS1-1	ACO1-1/2	CC	9.31172	-35.1634	6.0374	267.825
304	KAR 83	GT	ACS1-1/2	ACO1-1/2	CC	9.97169	-45.5719	5.4274	271.446
303	Orangutang	GT	ACS1-1/2	ACO1-1	CC	9.86641	-13.1734	8.56667	274.96
323	KAR 114	TT	ACS1-1	ACO1-1	CC	6.46048	-2.48718	6.2998	253.76
1047	No Blow	GG	ACS1-1	ACO1-1	CC	NA	NA	NA	NA
985	Potter	GT	ACS1-1/2	ACO1-1	CC	10.4593	-47.2058	5.5219	254.437
64	Pia	TT	ACS1-1/2	ACO1-1	AC	6.89727	-39.1897	4.19425	247.745
34	SJCXN982	GT	ACS1-2	ACO1-1	CC	11.0324	NA	NA	275.576
103	Kaz 95 18-02P-30	GT	ACS1-1	ACO1-1/2	AA	10.6661	-48.8362	5.4572	247.021
976	Primus	GG	ACS1-1/2	ACO1-1	CC	NA	NA	NA	NA
538	Clear Gold	GT	ACS1-1/2	ACO1-1	CC	8.04601	-23.8927	6.1236	281.96
751	Krievu Rosmarins	GG	ACS1-1	ACO1-1	AA	8.30434	-40.7129	4.9234	247.353
448	Black Oxford	GT	ACS1-2	ACO1-1	CC	11.5404	-48.4212	5.9524	281.96
38	NY65707-19	GG	ACS1-1	ACO1-1/2	CC	8.44761	-40.8543	4.9964	274.96
389	Bonza	GT	ACS1-1/2	ACO1-1	CC	8.44961	-12.9309	7.357	267.96
60	Pinova	TT	ACS1-2	ACO1-1	CC	7.73784	-12.3115	6.7852	271.521
53	SPA 505	TT	ACS1-2	ACO1-1/2	CC	8.52736	-18.9128	6.9146	278.718
675	S19-23-52	GT	ACS1-1	NA	AC	8.75294	NA	NA	243.595
57	McIntosh	GG	ACS1-1	ACO1-1	CC	8.03121	-50.7496	3.9554	253.96
456	Coconut Crunch	TT	ACS1-2	ACO1-1/2	CC	10.3939	-21.1868	8.1918	281.879
4	Florina	TT	ACS1-1/2	ACO1-1	CC	9.74724	-37.3689	6.1048	271.379
499	Belle Fleur de France	GT	NA	ACO1-1	CC	10.7265	-40.1036	6.4248	290.101
729	Kendall	GT	ACS1-1	ACO1-1	CC	8.39054	-39.5581	5.0714	253.662
556	Battleford	GT	NA	NA	AA	6.35661	-37.6633	3.9625	239.529
443	Blahova Ruzena	GG	NA	ACO1-1	CC	13.0999	-22.3704	10.1694	289.114
1244	Kaz 95 05-01P-3	GG	ACS1-1	ACO1-1	AA	9.04255	-53.8736	4.171	229.552
259	KAS 53	TT	ACS1-2	NA	CC	NA	NA	NA	NA
851	Johannes Bottner	GG	ACS1-1	ACO1-1	CC	7.23774	-51.8966	3.4816	271.379
1055	Red Joaneting	GG	ACS1-1	ACO1-1	AA	NA	NA	NA	NA
946	Middleton Fameuse	GG	ACS1-1/2	ACO1-1	CC	8.39934	-46.7792	4.4702	260.862
845	Howgate Wonder	GT	ACS1-2	ACO1-1	CC	NA	NA	NA	NA
319	KAR 99	GT	ACS1-2	ACO1-1	AC	9.96681	NA	NA	274.529
177	Mollie's Delicious	GT	ACS1-1/2	ACO1-1	AC	6.80466	NA	NA	250.414
1057	Malabols	GT	ACS1-1	ACO1-1	AC	8.21681	-54.5103	3.7378	239.529
108	Kaz 95 18-02P-20	GT	ACS1-1	ACO1-1	AA	4.91041	13.4244	5.5696	246.529
347	KAR 32	GG	ACS1-1	ACO1-1	CC	10.1112	NA	NA	262.263
1286	KAZ 96 07-06	GT	ACS1-1	ACO1-1	AC	NA	NA	NA	NA
434	Blaxtayman	GT	ACS1-1	NA	CC	9.74439	NA	NA	267.767
87	S47-20-005	GT	ACS1-1	ACO1-1	AC	8.44987	NA	NA	239.795
161	FORM 181 (35-01)	GG	ACS1-1	NA	AA	5.87638	NA	NA	226.698
477	Daux Belan	TT	ACS1-1/2	ACO1-1	CC	NA	NA	NA	NA
1	Jonafree	GT	ACS1-1/2	NA	CC	8.72054	-38.1896	5.3902	275.286
290	KAS 69	GG	ACS1-1	ACO1-1/2	CC	7.42068	NA	NA	240.029
529	Ashmead's Kernel	GG	ACS1-1/2	NA	CC	NA	NA	NA	NA
1222	Greensleeves	GG	ACS1-1/2	ACO1-1	CC	6.97264	-48.4127	3.597	267.412
1036	Purpurroter Cousinot	GG	ACS1-1	ACO1-1	CC	12.37	-43.4098	7.0002	268.194
464	Brunnerling	GT	ACS1-1/2	ACO1-1	CC	10.2474	NA	NA	281.028
366	Bulmer Norman	GT	ACS1-1	ACO1-1	NA	8.432	NA	NA	254.279
1022	March #1	GG	ACS1-1	ACO1-1	CC	NA	NA	NA	NA
711	Leyda	GT	ACS1-1	ACO1-1	AC	NA	NA	NA	NA
6	Judaine	GT	ACS1-1/2	ACO1-1	CC	12.6871	-40.2211	7.5842	268.219
505	Alkmene	GG	ACS1-2	ACO1-1	CC	6.63541	-49.2511	3.3674	260.028
942	Mucina	GG	ACS1-1	NA	AC	13.8752	-25.7078	10.3082	253.028
384	Chenango Strawberry	TT	ACS1-1	ACO1-1	CC	NA	NA	NA	NA
1266	Kaz 95 18-02P-6	GT	ACS1-1	ACO1-1	AC	11.5193	NA	NA	247.325
481	Bouteille	TT	ACS1-1/2	ACO1-1	CC	NA	NA	NA	NA
708	Jonathan	TT	ACS1-1/2	ACO1-1/2	CC	8.96454	-26.1736	6.6182	271.521
543	Boche	GT	ACS1-1	ACO1-1	CC	8.83941	-35.0975	5.737	274.96
1081	Pumpkin Sweet	GT	ACS1-1/2	ACO1-1	CC	NA	NA	NA	NA
1168	Safstaholm	TT	ACS1-1	ACO1-1	NA	4.53746	-30.2209	3.1662	233.218
1236	S23-04-462	GG	ACS1-1	ACO1-1	CC	8.99347	-52.977	4.229	253.795
858	Elektra	GT	ACS1-2	ACO1-1	CC	NA	NA	NA	NA
911	Harry Masters Jersey	GG	ACS1-1/2	ACO1-1	AC	10.4457	-32.4682	7.0542	268.099
247	Geneva early	GG	ACS1-1	ACO1-1	AA	NA	NA	NA	NA
1113	Ottawa 4	NA	ACS1-2	ACO1-1	CC	12.4801	-11.4797	11.0474	275.722
310	KAS 70	GT	ACS1-2	ACO1-1	CC	NA	NA	NA	NA
230	Eden	TT	ACS1-2	ACO1-1	CC	8.55456	-24.0265	6.4992	247.532
311	KAR 81	GG	ACS1-1	ACO1-1	CC	9.81638	NA	NA	247.507
925	Nehou	GT	ACS1-1/2	ACO1-1	CC	NA	NA	NA	NA
342	KAS 20	GG	ACS1-1	ACO1-1	AC	NA	NA	NA	NA
707	Krapchatoe	GT	ACS1-1/2	ACO1-1	AC	6.18589	NA	NA	240.437
759	Halberstadter Jungfernapfel	GT	ACS1-1	NA	CC	9.17587	-35.1909	5.9468	254.745
472	Crimson Bramley	GT	ACS1-1/2	NA	CC	NA	NA	NA	NA
1156	White Jersey	GT	ACS1-1	ACO1-1	AC	NA	NA	NA	NA
1137	Seestermuher Zitronenapfel	TT	ACS1-1/2	ACO1-1	CC	NA	NA	NA	NA
146	Cox's Orange Pippin	GG	ACS1-1/2	ACO1-1	CC	NA	NA	NA	NA
627	S42-48-06	TT	ACS1-1	ACO1-1	AA	NA	NA	NA	NA
231	Coxs Orange	GG	ACS1-1/2	ACO1-1	CC	NA	NA	NA	NA
722	Golden Winesap	GT	ACS1-1	ACO1-1	CC	NA	NA	NA	NA
898	Exeter Cross	GG	ACS1-1/2	ACO1-1	AC	5.60681	NA	NA	225.529
698	S19-17-31	GT	ACS1-1	NA	AC	8.71284	-44.0504	4.8748	267.874
888	Lobo	GT	ACS1-1	ACO1-1	CC	8.90521	-54.8354	4.022	253.529
609	S47-24-47	GG	ACS1-1	ACO1-1	CC	7.10252	NA	NA	262.101
918	Luke	GT	ACS1-1/2	ACO1-1	AC	8.16784	NA	NA	253.883
984	Ottawa 271	GG	ACS1-1	ACO1-1	AA	NA	NA	NA	NA
65	Holly	TT	ACS1-2	ACO1-1/2	CC	9.32354	-45.6237	5.0698	264.487
35	8B 14 56	GT	ACS1-1	ACO1-1/2	CC	7.22275	-10.8954	6.4358	271.847
934	Ottawa 292	GG	ACS1-1/2	ACO1-1	AC	4.51321	NA	NA	232.529
95	SJC 8444-2	TT	ACS1-1	ACO1-1	CC	7.58774	-48.5143	3.9066	253.662
973	Oekonomierat Echter-meyer	GG	ACS1-1	ACO1-1	NA	14.21	-50.3517	7.055	282.315
254	Jerseyred	GG	ACS1-1/2	ACO1-1	NA	NA	NA	NA	NA
292	KAR 88	TT	ACS1-1	ACO1-1	AA	8.46035	NA	NA	243.552
223	Haralson	TT	ACS1-2	ACO1-1/2	CC	7.63556	-26.6511	5.6006	254.315
1123	Maude	GG	ACS1-1	ACO1-1	AC	8.84561	-49.367	4.4788	239.028
878	Heyer #2	GT	ACS1-1	ACO1-1	AA	4.95066	NA	NA	236.177
1130	Twistbody Jersey	GG	ACS1-1/2	ACO1-1	AC	NA	NA	NA	NA
184	Djulabia	GT	ACS1-1	ACO1-1	CC	9.19755	NA	NA	275.096
1051	Paragon	GT	ACS1-1	NA	CC	13.0366	NA	NA	281.904
503	Berner Rosen	GG	ACS1-1	ACO1-1	CC	8.32174	-38.5562	5.1132	257.786
1112	Obilnoye	GG	ACS1-1	ACO1-1	CC	8.49938	-34.9105	5.5322	282.651
930	Renown	GG	ACS1-1	ACO1-1	CC	NA	NA	NA	NA
489	Champagne Reinette	GG	ACS1-1	ACO1-1	CC	10.0332	-40.5175	5.968	288.028
1098	Mariborka	TT	ACS1-1	ACO1-1	CC	7.11649	-45.7261	3.8624	267.84
1054	Mannington Pearmain	GG	ACS1-1	NA	CC	NA	NA	NA	NA
1163	William Crump	GT	ACS1-2	ACO1-1	CC	9.42848	-36.4726	5.98967	269.165
1108	Nico	GG	ACS1-1	NA	AA	NA	NA	NA	NA
728	Graue Renette Von Zabergau	GT	ACS1-1	NA	CC	9.00301	-23.3878	6.8974	281.028
895	Kidd's Orange Red	GT	ACS1-1/2	NA	CC	NA	NA	NA	NA
348	KAR 37	TT	ACS1-1	ACO1-1	AA	NA	NA	NA	NA
343	KAS 6	GG	ACS1-1	ACO1-1/2	CC	8.24849	-12.7768	7.1946	278.471
823	Ivan	NA	ACS1-1	NA	NA	13.8446	-29.1419	9.81	247.698
809	Kitanosachi	TT	ACS1-1	ACO1-1	CC	NA	NA	NA	NA
776	Fillbarrel	GG	ACS1-1/2	ACO1-1	CC	NA	NA	NA	NA
286	KAS 77	GG	ACS1-1	ACO1-1	AC	NA	NA	NA	NA
548	Belle de Boskoop	GT	ACS1-1	ACO1-1	CC	9.35863	-43.6317	5.2753	279.116
1107	Potter Cox	GG	ACS1-1/2	ACO1-1	CC	10.5325	-52.1102	5.044	265.035
212	Ein Shemer	GG	ACS1-1/2	ACO1-1	AC	10.9046	NA	NA	246.931
74	Sir Prize	GG	ACS1-1/2	ACO1-1	NA	7.7645	-48.0662	4.0324	260.968
340	KAR 1	GG	ACS1-1	ACO1-1	CC	10.6676	-45.1684	5.8492	261.507
1194	Sylvia	GT	ACS1-1	ACO1-1	AC	4.0715	NA	NA	225.968
118	Kaz 95 05-01P-25	GT	ACS1-1	ACO1-1	AC	5.5839	NA	NA	253.968
98	INR 3318	TT	ACS1-2	ACO1-2	CC	9.72499	-6.93458	9.0506	275.357
328	KAS 39	GG	ACS1-1	ACO1-1/2	CC	7.45393	NA	NA	271.489
677	S38-03-28	GT	ACS1-1	ACO1-1	AC	9.91394	-52.8553	4.6739	268.31
810	Glenorchie	GG	ACS1-1	ACO1-1	AC	6.1657	-55.1811	2.7634	239.968
583	Canada Grise	GT	ACS1-1	NA	CC	10.0104	-61.8197	3.822	278.599
140	Rambo-Red Summer	GT	ACS1-1	ACO1-1/2	CC	7.0443	NA	NA	260.968
48	Red Delicious	GT	ACS1-1/2	ACO1-2	CC	8.27029	NA	NA	275.103
653	S47-25-82	GT	ACS1-1/2	ACO1-1	CC	9.3889	-35.6922	6.0378	274.968
549	Blaze	GG	ACS1-1/2	ACO1-1	AC	7.99889	NA	NA	261.206
126	Kaz 95 05-01P-16	GT	ACS1-1	ACO1-1	AA	7.22812	NA	NA	233.22
1075	Rambourg d'Automme	TT	ACS1-1	ACO1-1	CC	NA	NA	NA	NA
820	Keuleman	TT	ACS1-1	ACO1-1	CC	NA	NA	NA	NA
965	Paradiso	TT	ACS1-1	ACO1-1	CC	12.3076	-36.3756	7.83067	275.334
43	Rubinette	GG	ACS1-2	ACO1-1	CC	7.21173	-37.5147	4.50627	277.026
18	Generos	TT	ACS1-1/2	ACO1-2	CC	NA	NA	NA	NA
251	Red-Del-Stark	GT	ACS1-1/2	ACO1-2	CC	8.62751	-26.892	6.3074	275.027
157	Korichnoe Polosatoje	GT	ACS1-1	ACO1-1	AA	NA	NA	NA	NA
1205	St. Anna Rode Boskoop	GT	ACS1-1	ACO1-1	CC	10.5914	-38.8845	6.473	278.517
1240	Balancier	GT	ACS1-1	ACO1-1	NA	NA	NA	NA	NA
182	Ozark Gold	TT	ACS1-1/2	ACO1-1/2	CC	8.38189	-43.6547	4.7228	264.75
1101	Reineta do Caravia	GT	ACS1-1	ACO1-1	CC	10.2205	NA	NA	281.755
110	Kaz 95 10-01L	GG	ACS1-1	ACO1-1	AA	7.4165	-35.177	4.8076	225.755
68	Rewina	GT	ACS1-1/2	ACO1-1/2	CC	8.06579	-24.0198	6.1284	267.918
202	Hartmann-Muhle 1 x Oberwartha 2	TT	ACS1-2	ACO1-1	CC	NA	NA	NA	NA
924	Oliver or Senator	GG	ACS1-1/2	ACO1-1	CC	11.3789	-45.9332	6.1522	271.6
1135	Suislepas Rozabols	GG	ACS1-1	ACO1-1	AA	NA	NA	NA	NA
29	Ottawa 654	GT	ACS1-1/2	ACO1-1	CC	7.77679	-43.2131	4.4162	254.1
313	KAS 64	GT	ACS1-1	NA	CC	8.37901	NA	NA	271.54
967	Norland	GT	ACS1-1	ACO1-1	AA	6.87769	-55.5112	3.0598	226.25
355	KAS 19	GG	ACS1-1	ACO1-1	CC	6.3303	NA	NA	246.755
205	Gala	GT	ACS1-2	ACO1-1/2	CC	10.9513	-38.7397	6.7088	253.755
893	Kardinal Bea	GT	ACS1-1	ACO1-1	CC	8.35321	-38.2872	5.155	257.631
130	KAZ 96 09-01P-4	GT	ACS1-1	ACO1-1	AC	NA	NA	NA	NA
800	Merton 778	GT	ACS1-1/2	ACO1-1	CC	9.78628	-52.0594	4.6916	275.219
1291	KAZ 96 08-01P-37	NA	ACS1-1	ACO1-1	AA	11.2111	NA	NA	239.802
364	KAR 23	GG	ACS1-1	ACO1-1	CC	10.0128	NA	NA	239.403
844	Eickhoff	GT	ACS1-1/2	ACO1-1	AC	8.59771	-28.8368	6.1184	267.818
1129	Smordodina	GT	ACS1-1/2	ACO1-1	AC	NA	NA	NA	NA
555	Black Gilliflower	GT	ACS1-1/2	ACO1-1	CC	10.637	-51.4291	5.1665	282.211
647	S47-23-82	GG	ACS1-1	ACO1-1	AC	6.17799	-54.0368	2.8396	229.333
889	Isayev's Desertnyi	GT	ACS1-1	ACO1-1/2	AC	NA	NA	NA	NA
412	Edelborsdorfer	NA	ACS1-1	ACO1-1/2	CC	NA	NA	NA	NA
1230	Milwaukee	GT	ACS1-1	ACO1-1	AC	6.87263	-30.8445	4.7528	281.584
417	Early Harvest	GT	ACS1-1	ACO1-1/2	AA	NA	NA	NA	NA
1084	Paides Ziemas Abols	GT	ACS1-1	NA	AA	6.7209	NA	NA	260.159
779	Jefferis	GG	ACS1-1	ACO1-1	AC	7.5191	-36.8542	4.748	239.159
1068	Red Ralls	GT	ACS1-2	ACO1-1/2	CC	9.46011	NA	NA	285.318
143	Ingrid Marie	GG	ACS1-1/2	NA	CC	NA	NA	NA	NA
700	S16-15-106	GT	ACS1-1/2	ACO1-1/2	CC	7.8775	-25.8064	5.8446	281.159
664	S19-25-36	GT	ACS1-1/2	ACO1-1	AC	12.9801	NA	NA	239.159
763	Grosse Mouche	GT	ACS1-1	ACO1-1	CC	NA	NA	NA	NA
850	Huvitus	GT	ACS1-1	ACO1-1	AA	NA	NA	NA	NA
274	KAR 86	GT	ACS1-1	ACO1-1	CC	7.19364	NA	NA	250.81
411	Aivania	GT	ACS1-1	ACO1-1	CC	8.51555	-23.1383	6.5452	276.263
423	Chautauqua	GT	ACS1-1/2	ACO1-1	CC	8.48854	-35.129	5.5066	285.81
1144	Spasserud	GT	ACS1-1	ACO1-1	AC	NA	NA	NA	NA
980	Mitschurins Samenloser	GG	ACS1-1	ACO1-1	AC	7.4009	NA	NA	245.097
356	KAR 25	GT	ACS1-1	ACO1-1	CC	7.0259	NA	NA	253.968
807	Kingjon	TT	ACS1-1/2	ACO1-1/2	CC	7.78523	-29.3457	5.5006	268.124
803	Griffith	GT	ACS1-1/2	ACO1-1	CC	9.99508	-34.6679	6.53	282.219
890	Grise Dieppoise	GG	ACS1-1/2	ACO1-1	AC	13.4227	-18.7077	10.9116	248.545
1025	Pomme Cloche	GG	ACS1-1/2	ACO1-1	CC	10.4876	-27.8176	7.5702	278.364
778	Idajon	GG	ACS1-1/2	ACO1-1	CC	7.4981	-41.8226	4.3622	267.968
213	Reinette Simirenko	GG	ACS1-1/2	ACO1-1	CC	NA	NA	NA	NA
860	Elisa Ratkee	GT	ACS1-1	ACO1-1	CC	NA	NA	NA	NA
1004	Lurared	TT	ACS1-1/2	ACO1-1/2	CC	6.89364	-42.5035	3.9636	268.081
1237	S23-06-129	GT	ACS1-1/2	ACO1-1	CC	8.59741	-37.8429	5.3439	275.535
116	KAZ 93-19-02	TT	ACS1-1	ACO1-1/2	AA	NA	NA	NA	NA
1073	Nugget	GT	ACS1-1/2	ACO1-1	CC	9.84857	NA	NA	274.968
462	Crawley Reinette	GT	ACS1-1/2	ACO1-2	CC	8.1243	-48.533	4.18133	274.755
1061	Norhey	NA	ACS1-1	ACO1-1	AA	9.54971	NA	NA	233.477
244	KAS 21	GG	ACS1-1	ACO1-1	AC	6.90204	NA	NA	246.931
972	Pomme Raisin	GT	ACS1-1	ACO1-1	CC	7.9197	-24.8305	5.9532	267.755
862	Hubbardston Nonsuch	GT	ACS1-1/2	ACO1-1	CC	10.2389	NA	NA	289.131
470	Barkley Rome	GG	ACS1-1/2	ACO1-1	CC	9.91131	-39.5095	5.9954	278.488
587	Jonasty	GT	ACS1-1/2	ACO1-1	CC	8.5317	-39.6205	5.1514	274.755
268	KAR 80	GG	ACS1-1	ACO1-1	CC	9.4325	NA	NA	253.755
61	Piflora	GT	ACS1-1	ACO1-1/2	CC	8.57629	-39.3398	5.2024	265.263
1147	Stone Pippin	GT	ACS1-1	ACO1-1	CC	11.7259	-32.2202	7.9478	288.988
624	S42-08-08	GG	ACS1-1	ACO1-1	AC	5.87275	NA	NA	260.882
363	KAR 14	GG	ACS1-1	ACO1-2	CC	8.57092	NA	NA	255.101
649	S23-14-46	GT	NA	ACO1-1	AC	10.1647	NA	NA	254.444
840	Ernst Bosch	GT	ACS1-1/2	NA	AC	9.5383	-39.8976	5.73275	239.755
1212	Uljanisceva	GG	ACS1-1/2	ACO1-1	CC	8.63699	NA	NA	285.487
753	Kestrel	GG	ACS1-1	ACO1-1	CC	7.87444	-37.1511	4.949	257.703
335	Sid the Kid	GG	ACS1-1/2	NA	CC	8.85038	-29.3702	6.251	254.619
690	S10-16-14	GT	ACS1-1/2	ACO1-1	AC	9.43773	-53.6075	4.3784	250.382
358	Black Pearl	GG	ACS1-2	ACO1-1	CC	10.4934	-43.2674	5.9532	257.727
710	Heimenhofer	GT	ACS1-1	ACO1-1	CC	9.6967	-30.3928	6.7496	267.159
1150	Sipolins	TT	ACS1-1	ACO1-1	AC	10.3725	-23.3145	7.9542	267.159
652	S47-23-49	GG	ACS1-1	ACO1-1	AC	7.20818	-49.2632	3.6572	253.682
138	Petrel	GG	ACS1-1/2	ACO1-1	AC	NA	NA	NA	NA
1030	Lorna Doone	GG	ACS1-1	ACO1-1	AC	6.91879	NA	NA	243.662
948	Mantuanskoye	GT	ACS1-1/2	ACO1-1/2	CC	8.6369	-14.4068	7.3926	274.159
680	S38-03-15	GT	ACS1-1	ACO1-1	AC	NA	NA	NA	NA
299	KAR 104	GT	ACS1-1/2	ACO1-1	CC	8.32753	-36.3893	5.2972	268.459
790	Lemoen	GT	ACS1-1/2	NA	CC	9.76087	-33.5638	6.48475	264.066
339	KAR 16	TT	ACS1-1	NA	CC	8.0665	-19.3008	6.5096	260.159
141	Red Apple	GT	ACS1-1	ACO1-1	AA	5.6491	-37.8167	3.5128	246.159
78	NY75413	GT	ACS1-1	ACO1-1/2	CC	8.62683	NA	NA	271.084
1060	Martha	GT	ACS1-1	ACO1-1	NA	11.9291	-62.77	4.4412	246.742
510	Charden	GT	ACS1-1/2	NA	CC	7.65433	-42.4508	4.405	281.584
71	MN1797	GT	ACS1-1/2	ACO1-1	CC	8.24668	-37.0874	5.1882	265.061
176	Jonagold	GT	ACS1-1/2	ACO1-1	CC	7.26194	-37.295	4.5536	281.929
1044	Milton	GG	ACS1-1	ACO1-1	AC	NA	NA	NA	NA
1131	Starking	GT	ACS1-1/2	ACO1-2	CC	8.80544	NA	NA	271.177
1217	Charlotte	GG	ACS1-1/2	ACO1-1	CC	6.80691	-47.233	3.5918	264.242
395	Alton	GG	ACS1-1	ACO1-1	AA	4.4698	-30.5294	3.1052	232.895
351	KAR 5	GG	ACS1-1	NA	CC	7.39526	-44.9999	4.0674	254.058
1065	Pewaukee	GG	ACS1-1	ACO1-1	CC	10.1414	NA	NA	281.895
523	Crown Prince Rudolf	GT	ACS1-1	ACO1-1	CC	9.3278	NA	NA	260.895
832	Flower of Kent	GG	ACS1-1	ACO1-1	NA	7.41788	NA	NA	260.76
388	Belle Imperiale	GT	ACS1-1/2	ACO1-1	AC	4.18254	-50.0495	2.0892	226.72
855	Euzia	GT	ACS1-1	ACO1-1	NA	NA	NA	NA	NA
588	Reine des Reinettes	TT	ACS1-1	NA	CC	9.92464	-45.7875	5.3804	272.03
910	Jaune lu Desert	GT	ACS1-1	ACO1-1	NA	9.38127	NA	NA	255.11
1193	Royale d'Angleterre	GT	ACS1-1	NA	CC	9.26632	NA	NA	275.298
426	Claudius Herbstapfel	TT	ACS1-1	ACO1-1	AC	5.6226	NA	NA	239.895
902	Freiherr Von Berlepsch	GT	ACS1-1/2	NA	CC	NA	NA	NA	NA
156	Cherry Cox	GG	ACS1-1/2	ACO1-1	CC	9.74628	NA	NA	268.219
129	Kaz 95 09-03F	GG	ACS1-1	ACO1-1	AA	5.27414	-67.6952	1.7038	226.53
502	Cartigny	GG	ACS1-1	ACO1-1	CC	NA	NA	NA	NA
1196	Suislepper	GG	ACS1-1	ACO1-1	AA	NA	NA	NA	NA
106	KAZ 96 07-01P-24	GG	ACS1-1	ACO1-1	AA	NA	NA	NA	NA
660	S29-13-105	GG	ACS1-1	ACO1-1	CC	7.80428	-46.9163	4.1428	261.087
89	Galarina	GT	ACS1-2	ACO1-1	CC	9.1906	3.17278	9.4822	274.895
500	Apfel aus Grunheide	GG	ACS1-1/2	ACO1-1	CC	NA	NA	NA	267.895
1184	Sensacion	GT	ACS1-1	ACO1-1	CC	NA	NA	NA	NA
826	Goldsmith	TT	ACS1-1/2	ACO1-1	CC	8.26915	-12.3882	7.24475	275.279
13	INR 6407	TT	ACS1-2	ACO1-1	CC	9.5048	-15.6595	8.0164	260.665
811	Litevsky Jadernac	GT	ACS1-1/2	ACO1-1	AC	8.29174	-51.793	3.9972	253.947
772	Kitaika Zolotaia Ranniaia	NA	ACS1-1	NA	AA	10.3465	NA	NA	225.837
1224	KAR 28	GG	ACS1-1	ACO1-1/2	CC	8.78134	-42.3673	5.06093	272.105
1175	Tioga	GT	ACS1-1/2	ACO1-1	CC	NA	NA	NA	NA
528	DNAerton Late Sweet	GT	ACS1-1	ACO1-1	CC	NA	NA	NA	NA
367	Collins June	GT	ACS1-1	ACO1-1/2	AA	3.89756	NA	NA	226.383
234	Iwakami	TT	ACS1-2	ACO1-2	CC	8.24668	NA	NA	257.472
1138	Yellow Arkad	GT	ACS1-1	ACO1-1	AA	NA	NA	NA	NA
332	KAS 44	GG	ACS1-1/2	ACO1-1	CC	9.85978	-45.2832	5.39495	258.713
638	S23-04-570	GG	ACS1-1	ACO1-1	AC	8.5786	NA	NA	239.665
1003	Potomac	GT	ACS1-1/2	ACO1-1	CC	10.1872	-35.8256	6.5376	274.873
896	Gilliflower	GT	ACS1-1/2	ACO1-1	CC	10.6201	NA	NA	278.472
397	Bushy Grove	GG	ACS1-1	ACO1-1	CC	6.1318	-49.881	3.0732	246.665
237	SJC A 37+	GT	ACS1-1	ACO1-1/2	AC	6.87706	NA	NA	236.571
891	Khashabi	GG	ACS1-1	ACO1-1/2	AA	3.82331	NA	NA	250.451
476	Antonovka	GT	ACS1-1	ACO1-1	AC	8.3464	NA	NA	253.665
432	Earliblaze	TT	ACS1-1/2	ACO1-1	AC	7.95924	-23.0278	6.1264	253.73
764	Feys Record	GT	ACS1-1	ACO1-1	AC	8.72267	NA	NA	261.745
45	Melrose	TT	ACS1-2	ACO1-1/2	CC	7.63975	-17.8115	6.279	268.009
107	Kaz 95 18-08	TT	ACS1-1	ACO1-1	CC	10.8042	-26.5468	7.936	253.657
469	Amur Naliv	GG	ACS1-1	ACO1-1	CC	7.45215	-47.3575	3.923	258.6
180	GMAL 3310	TT	ACS1-1	ACO1-1	AA	NA	NA	NA	NA
225	Idared	GT	ACS1-1/2	ACO1-1/2	CC	8.78284	-15.4396	7.4268	278.087
956	Repinaldo do Liebana	GT	ACS1-1	ACO1-1	CC	7.46612	-20.738	5.9178	289.22
547	Beatrix	GT	ACS1-1	ACO1-1	CC	7.76607	NA	NA	261.082
125	KAZ 96 07-08	GG	ACS1-1	ACO1-1	AA	NA	NA	NA	NA
206	Idagold	GT	ACS1-2	ACO1-1/2	CC	8.75651	NA	NA	268.477
418	Anisim	GG	ACS1-1	ACO1-1	CC	9.92764	-24.9137	7.4543	281.426
424	Bessemianka Michurina	GT	ACS1-1	ACO1-1	NA	NA	NA	NA	NA
40	Braeburn	GT	ACS1-1/2	NA	CC	12.9091	-9.16361	11.7262	274.834
718	Jan Steen	GG	ACS1-1	ACO1-1	AC	NA	NA	NA	NA
267	KAS 72	GT	ACS1-1	ACO1-1/2	CC	9.51894	NA	NA	278.419
612	S47-21-32	GT	ACS1-1	ACO1-1	CC	6.74688	NA	NA	243.186
266	KAR 103	GG	ACS1-1	ACO1-1	CC	7.00784	-51.7597	3.3806	250.419
152	Kimball McIntosh 2-4-4-4	GG	ACS1-1	ACO1-1	CC	7.2498	NA	NA	260.093
273	KAR 90	GT	ACS1-1	ACO1-1	CC	7.1826	-23.9217	5.4644	267.093
766	Guldborg	GG	ACS1-1	ACO1-1	CC	NA	NA	NA	NA
171	Empire	GG	ACS1-1/2	ACO1-1/2	CC	8.79452	-36.8106	5.5572	275.094
486	Brettacher	GT	ACS1-1	NA	CC	NA	NA	NA	NA
573	Bashkirian Beauty	GT	ACS1-1	NA	CC	NA	NA	NA	NA
558	Alexander	GG	ACS1-1	NA	CC	5.897	-50.5817	2.9142	253.895
586	Ottawa 381	GG	ACS1-1	ACO1-1/2	CC	9.40578	NA	NA	260.931
55	McShay	GT	ACS1-1	ACO1-1	CC	6.70954	NA	NA	267.895
827	Ermak	NA	ACS1-1	NA	AC	5.40464	NA	NA	240.72
688	S16-06-84	GG	ACS1-1/2	ACO1-1	AC	5.69069	-58.2968	2.3732	229.904
1008	Oxbo	GT	ACS1-1	ACO1-1	AC	7.603	NA	NA	253.895
400	Dubbele Zoete Aagt	GT	ACS1-1	ACO1-1	CC	8.7058	-31.8127	5.93625	253.895
428	Brazil	GG	ACS1-1/2	NA	CC	8.45287	-44.5703	4.6854	271.67
958	Minister von Hammerstein	TT	ACS1-1/2	ACO1-1/2	CC	7.4288	-30.021	5.1986	274.895
1145	Schoner aus Miltenberg	GT	ACS1-1	ACO1-1	CC	NA	NA	NA	NA
544	Conrad	GT	ACS1-1/2	NA	CC	7.50274	-37.7868	4.6677	268.235
727	Lord Lambourne	GG	ACS1-1/2	ACO1-1	CC	6.88232	-41.0286	4.0586	261.498
190	GMAL 3223	GT	ACS1-1/2	NA	AC	8.245	-62.3117	3.1074	250.328
1160	Tydemans Early Worcester	GG	ACS1-1	ACO1-1	CC	6.41576	NA	NA	240.186
546	Acme	GG	ACS1-1	ACO1-1	CC	NA	NA	NA	NA
47	11W-19-18	GT	ACS1-2	ACO1-1	CC	8.98824	NA	NA	253.845
880	Late Strawberry	GT	ACS1-1/2	ACO1-1	AC	7.98558	NA	NA	257.472
298	KAR 110	GG	ACS1-1/2	ACO1-1	AC	6.69694	-29.2513	4.738	264.915
25	Co-op 28	GT	ACS1-2	ACO1-1	CC	7.83626	-2.72658	7.6226	271.443
1080	Mill End	GG	ACS1-1/2	ACO1-1/2	CC	9.97804	-37.619	6.2244	278.451
744	Jamba	GG	ACS1-1	ACO1-1	AC	6.2014	-52.1657	2.9664	253.665
15	Co-op 29	GG	ACS1-1/2	ACO1-1	CC	10.043	-33.731	6.6554	274.665
334	KAS 41	TT	ACS1-1	ACO1-1	CC	8.89189	NA	NA	250.298
875	Greenchisel	GT	ACS1-1	ACO1-1	AC	NA	NA	NA	NA
148	Marshall McIntosh	NA	ACS1-1	ACO1-1	CC	7.76816	-50.8764	3.816	250.884
1211	Tohoku 2	GG	ACS1-1	ACO1-1	CC	7.50179	-42.0432	4.3478	247.289
868	Linda	GT	ACS1-1/2	ACO1-1	CC	7.28272	-35.5564	4.69325	254.298
277	Masonova	GG	ACS1-1	ACO1-1	CC	NA	NA	NA	NA
770	Golden Russet	GG	ACS1-1/2	ACO1-1	CC	13.2707	-43.7513	7.4646	282.477
1275	Kaz 95 18-10	GG	ACS1-1	ACO1-1	AC	10.4828	NA	NA	243.789
409	Bodil Neergaard	GG	ACS1-1/2	ACO1-1	CC	NA	NA	NA	NA
1218	Charlotte	GG	ACS1-1/2	ACO1-1	AC	6.4882	NA	NA	225.665
1210	Smokehouse	GG	ACS1-1/2	ACO1-1	CC	9.40766	-41.5689	5.497	278.883
1034	Nitschners Erdbeerapfel	GG	ACS1-1	ACO1-1	AC	9.0684	-56.8193	3.9158	253.665
5	Liberty	GT	ACS1-1	ACO1-1/2	CC	9.58109	-36.2432	6.1086	271.586
527	Beacon	TT	ACS1-1/2	ACO1-1	AA	NA	NA	NA	NA
454	Cranzhevoje	GG	ACS1-1/2	ACO1-1	AC	7.6118	NA	NA	267.093
576	Tom McLean	GT	ACS1-1	ACO1-1/2	CC	10.912	-45.3959	5.9584	267.093
631	S47-21-29	GG	ACS1-1	ACO1-1	AC	5.94887	NA	NA	239.093
1292	KAZ 96 08-17	GT	ACS1-1	ACO1-1	CC	9.33749	-48.8128	4.7796	260.872
59	Priscilla	GT	ACS1-1/2	ACO1-1/2	CC	11.4974	-39.6915	6.9339	271.186
1153	Sundance	GT	ACS1-2	ACO1-1	CC	NA	NA	NA	NA
838	Herma	GT	ACS1-1/2	ACO1-1	CC	NA	NA	NA	NA
1029	Norfolk Royal	GT	ACS1-1	ACO1-1	AC	NA	NA	NA	NA
651	S23-03-749	GT	ACS1-1	ACO1-1	AC	7.07412	-44.3146	3.93925	261.298
642	S23-02-626	GT	ACS1-1	ACO1-1	NA	9.36804	NA	NA	277.944
179	Yellow Transparent	GG	ACS1-1	ACO1-1	AA	7.128	-60.0758	2.8458	225.093
617	S42-28-05	GG	ACS1-1	NA	CC	NA	NA	NA	NA
1272	Kaz 95 18-05	GT	ACS1-1	ACO1-1	AC	8.1746	-40.3347	4.8774	239.093
215	KAZ 95 08-06	GG	ACS1-1	ACO1-1	AC	5.86784	-41.4776	3.434	246.587
852	Ikorocavka Alaja	GT	ACS1-1	ACO1-1	AA	3.55194	-35.7815	2.281	247.101
1159	Wright	GT	ACS1-1	ACO1-1	CC	7.21166	-38.6022	4.4278	271.285
1037	Redgold	GT	ACS1-1/2	ACO1-1/2	CC	8.6416	-35.3176	5.5896	267.093
885	Jones Favorite	GT	ACS1-1	ACO1-1	CC	11.5282	-47.2372	6.0826	288.093
859	Egri Piros	GG	ACS1-1	ACO1-1	AC	7.0984	-41.6453	4.14225	239.313
20	Romus 3	GT	ACS1-1	ACO1-1	AC	7.4548	NA	NA	225.313
407	Dermen Black Stayman	GT	ACS1-1	NA	CC	9.652	-47.3917	5.07775	281.313
796	Goldjon	TT	ACS1-1	ACO1-1	CC	8.27936	-19.9938	6.624	267.767
308	KAS 40	GT	ACS1-2	ACO1-1	CC	8.41846	-36.176	5.373	264.707
224	Spartan	GG	ACS1-1	ACO1-1/2	CC	8.384	-44.4855	4.65433	267.313
1120	Michaelmas Red	GG	ACS1-1/2	NA	CC	7.61058	NA	NA	243.296
359	KAR 26	GG	ACS1-1	ACO1-1	CC	6.77312	-55.1876	3.0352	255.101
233	MN1802	TT	ACS1-2	ACO1-1	CC	6.36735	NA	NA	268.009
1126	Rambour Franc	TT	ACS1-1	ACO1-1	CC	NA	NA	NA	NA
629	S47-25-51	GT	ACS1-1	ACO1-1	CC	8.248	-34.0398	5.4404	274.313
794	Frequin Tardive de la Sarthe	GT	ACS1-1	ACO1-1	CC	NA	NA	NA	NA
1284	KAZ 96 07-03	GT	ACS1-1	ACO1-1	AA	5.2222	NA	NA	239.313
471	Deacon Jones	GG	ACS1-1/2	ACO1-1	CC	9.16596	-44.0451	5.1288	274.819
839	Koidu Renett	GT	ACS1-1	ACO1-1	AC	9.59954	NA	NA	236.529
1109	Mother	GG	ACS1-1/2	ACO1-1	CC	7.8596	-45.6512	4.2716	260.313
907	Imperial Stayman	GT	ACS1-1/2	ACO1-1	CC	9.23088	-35.3135	5.97113	268.288
27	NA	GT	ACS1-1/2	ACO1-1	CC	11.3319	-43.2927	6.426	268.576
799	Gibbs Golden Gage	NA	ACS1-1	NA	NA	NA	NA	NA	NA
1192	Saivanskaiya(Apple-Tree From Saivan)	GT	ACS1-1/2	ACO1-1/2	CC	9.09994	-44.6106	5.0404	278.529
368	Amri	GG	ACS1-1	NA	CC	11.8687	NA	NA	275.444
775	Karastojanka	GG	ACS1-1	ACO1-1	CC	9.81474	-38.3173	6.054	275.106
1282	KAZ 96 05-05	GT	ACS1-1	ACO1-1	AC	10.42	NA	NA	239.637
801	Liestnaya Antonoffku	GG	ACS1-1	ACO1-1	CC	7.278	NA	NA	253.637
1124	Red Dougherty	GT	ACS1-1	ACO1-1	CC	12.0072	-37.4525	7.5102	285.668
433	Captain Kidd	GT	ACS1-1/2	NA	CC	8.57509	-36.4578	5.4488	264.284
10	Vanda	GG	ACS1-1/2	ACO1-1	CC	NA	NA	NA	NA
1157	Spur Winter Banana	GT	ACS1-1	ACO1-1	AC	8.69626	-38.8381	5.3188	250.429
1248	Kaz 95 06-04	GG	ACS1-1	ACO1-1	AA	9.43166	NA	NA	240.369
990	Muscadet de Dieppe	GT	ACS1-1	ACO1-1	CC	8.70408	NA	NA	255.545
979	Peau d'Ane	GT	ACS1-1	ACO1-1	CC	12.8957	-23.9869	9.8024	282.444
830	Golden Noble	GG	ACS1-1/2	ACO1-1	CC	NA	NA	NA	NA
931	Orei	GT	ACS1-2	ACO1-1/2	CC	8.20726	-22.2152	6.384	275.057
466	Chieftain	TT	ACS1-2	ACO1-1/2	CC	10.0907	-51.702	4.8736	271.572
7	Novaspy	GG	ACS1-1	ACO1-1/2	CC	8.39767	NA	NA	282.23
634	S47-12-67	GG	ACS1-1	ACO1-1	AC	NA	NA	NA	NA
1167	Yellow Bellflower	GG	ACS1-1	ACO1-1	CC	NA	NA	NA	NA
1041	Marin Onfroy	GG	ACS1-1	ACO1-1	CC	NA	NA	NA	NA
203	Virginiagold	TT	ACS1-1	ACO1-1	CC	7.7762	-19.6394	6.249	274.637
493	Anis Aliy K-32	TT	ACS1-1	NA	AC	7.80539	NA	NA	253.915
1074	Peau de Vache	NA	ACS1-1	ACO1-1	CC	9.2802	-45.4365	5.0636	274.015
295	KAR 102	GG	ACS1-1	ACO1-1	CC	9.06128	NA	NA	246.647
783	Gallia Beauty	GG	ACS1-1/2	ACO1-1	CC	10.2387	-41.7155	5.9676	281.622
312	Crimson Gold	TT	ACS1-1/2	ACO1-1/2	CC	10.6666	-34.0671	7.0328	274.015
1090	Reneta Woskowa	GT	ACS1-1	ACO1-1	CC	10.4925	-45.3094	5.7384	261.23
822	Hermann	GT	ACS1-1	ACO1-1	CC	10.2971	NA	NA	271.117
733	Golden Harvey	GT	ACS1-1/2	ACO1-1/2	CC	9.76709	NA	NA	274.761
616	S41-11-03	GG	ACS1-1	ACO1-1/2	CC	9.10784	NA	NA	263.905
1095	Mr. Prothero	GT	NA	NA	CC	8.3666	-38.6418	5.1336	274.015
131	Rhode Island Greening	GT	ACS1-1/2	ACO1-1	CC	10.0408	-47.5599	5.2654	281.604
867	Iunost	GG	ACS1-1	ACO1-1	AA	4.45144	-26.8821	3.2548	225.761
461	Beauty of Bath	GT	ACS1-1/2	ACO1-1	AC	4.611	NA	NA	225.015
894	John Standish	GG	ACS1-1	ACO1-1	AC	12.7562	-31.779	8.7024	277.973
695	Ottawa 533	GT	ACS1-1	ACO1-1	AC	7.44288	-45.3034	4.071	247.219
276	KAS 59	TT	ACS1-1/2	ACO1-1/2	CC	7.48144	NA	NA	257.59
825	Garland	GT	ACS1-1/2	ACO1-1	CC	7.10879	NA	NA	246.761
287	KAS 61	GT	ACS1-2	ACO1-1/2	CC	8.36369	-39.113	5.0924	271.104
280	KAR 94	GG	ACS1-1	ACO1-1	CC	6.62384	NA	NA	254.062
1172	Uralskoje Nalivnoje	GT	ACS1-1	NA	NA	3.35327	NA	NA	260.015
866	Longfield	GT	ACS1-1/2	ACO1-1	AC	7.4152	-57.4388	3.156	260.313
241	MN1849	GG	ACS1-2	ACO1-1	AC	6.3962	NA	NA	253.604
856	Gloria Mundi	GG	ACS1-1	ACO1-1	CC	10.7956	NA	NA	288.313
85	SJC 658	GT	ACS1-1/2	ACO1-1	CC	7.02499	-42.7672	4.0206	257.613
419	Early Banta	GG	ACS1-1	NA	AC	7.29519	-44.4291	4.054	250.613
1190	Slor	GT	ACS1-1/2	NA	NA	6.19008	-44.2075	3.4536	254.219
207	Medaille d'Or	GG	ACS1-1	ACO1-1	AC	NA	NA	NA	NA
145	Redspur Delicious	GT	ACS1-1/2	ACO1-2	CC	9.16789	-24.7177	6.9018	268.113
1200	Beautiful Arcade	GG	ACS1-1	ACO1-1	AA	NA	NA	NA	NA
36	MN1839	TT	ACS1-2	ACO1-1	AC	9.07771	-40.1325	5.4346	261.325
1238	Sinta	GG	ACS1-1/2	ACO1-1/2	CC	7.04678	NA	NA	274.661
221	Megumi	GT	ACS1-2	ACO1-1/2	CC	8.0558	-44.6138	4.4618	281.313
914	Primrouge	GT	ACS1-2	ACO1-1	CC	7.99496	NA	NA	246.819
1174	Rubra Precoce Breviglieri	GG	ACS1-1/2	NA	CC	NA	NA	NA	NA
1103	Melba	GG	ACS1-1	ACO1-1	NA	7.057	-57.9028	2.9708	225.313
39	Keepsake	GT	ACS1-1/2	ACO1-1	CC	10.8352	-29.0922	7.683	274.313
725	Jonagram	GT	ACS1-1	ACO1-1/2	CC	7.02086	-47.9045	3.65755	264.395
991	Porter	GT	ACS1-1	NA	AC	7.51167	-39.2758	4.5614	254.745
557	Amere de Bellevue	GT	ACS1-1	ACO1-1	CC	11.4393	-43.8024	6.4286	269.165
904	Jouveaux	GT	ACS1-1/2	ACO1-1	CC	11.4944	-34.4966	7.5292	281.968
220	Sweet Delicious	GT	ACS1-1/2	NA	CC	7.64678	-36.1517	4.88233	274.931
998	Primate	GG	ACS1-1/2	ACO1-1	AA	5.1868	NA	NA	232.637
922	Lyman Prolific	GT	ACS1-1	ACO1-1	AC	13.8084	-56.8755	5.9548	239.637
357	Heart of Gold	GT	ACS1-2	ACO1-1	CC	11.1913	-34.5048	7.32975	261.23
511	Cestra Belferkitaika	GT	ACS1-1	ACO1-1	AC	NA	NA	NA	NA
1079	Northern Lights	TT	ACS1-1/2	ACO1-1	AA	6.19548	NA	NA	241.165
421	Coe's Golden Drop	TT	ACS1-1	ACO1-1/2	CC	NA	NA	NA	NA
350	KAR 24	GT	ACS1-1	ACO1-1	AC	6.899	-48.2708	3.5688	253.637
440	Court Pendu	GT	ACS1-1	ACO1-1/2	CC	NA	NA	NA	NA
797	Gales	GT	ACS1-2	ACO1-2	CC	8.51778	-40.1299	5.0996	264.323
9	Pristine	TT	ACS1-1/2	ACO1-1/2	AC	7.69734	NA	NA	225.933
741	Ellis Bitter	GT	ACS1-1/2	ACO1-1	CC	NA	NA	NA	NA
716	Inducoa No. II	GG	ACS1-1	ACO1-1	CC	9.7166	-49.8528	4.8726	274.637
818	Huidobro	GT	ACS1-1	ACO1-1	CC	10.3439	-45.5621	5.631	285.644
168	Kaz 95 18-09	GT	ACS1-1	NA	AA	9.53344	NA	NA	250.428
1116	Lowry	GT	ACS1-1/2	ACO1-1	CC	10.2887	-46.8225	5.4713	285.428
691	S10-16-48	GG	ACS1-1/2	ACO1-1	AC	10.6257	NA	NA	246.981
261	KAS 73	GG	ACS1-1	ACO1-1	CC	7.65014	NA	NA	250.437
1232	SweeTango	TT	ACS1-2	ACO1-1	NA	8.19534	-14.9915	6.96674	251.198
104	KAZ 96 08-01P-29	GG	ACS1-1	NA	AA	4.10588	NA	NA	246.647
614	S47-20-38	GT	ACS1-1	ACO1-1	AC	5.82749	NA	NA	232.833
836	Holstein	GT	ACS1-1/2	NA	CC	8.1524	NA	NA	260.015
595	S47-24-04	GG	ACS1-1	ACO1-1/2	CC	9.00006	NA	NA	257.246
813	King David	GT	ACS1-1/2	ACO1-1	CC	9.739	-44.3249	5.4222	274.015
1099	Pervenec Samarkanda	GT	ACS1-1	ACO1-1	CC	NA	NA	NA	NA
239	Empress	GG	ACS1-1	ACO1-1/2	CC	6.934	NA	NA	253.015
1002	Odin	GT	ACS1-1/2	ACO1-1	CC	7.4362	-43.2183	4.2224	253.015
1161	Stroming	GT	ACS1-1/2	NA	AA	6.0412	NA	NA	253.015
927	Pup's Jeannette	GT	ACS1-1	ACO1-1	CC	13.0806	NA	NA	288.473
463	Autumn Arctic	GT	ACS1-1	ACO1-1	CC	7.35079	-60.4567	2.90675	250.157
917	Rosu de Cluj	TT	ACS1-1/2	ACO1-1	CC	10.7836	-31.6258	7.3732	267.015
978	Red Sauce	GT	ACS1-1/2	NA	AC	8.9044	-41.4492	5.2136	253.015
1165	Tom Putt	GT	ACS1-1/2	ACO1-1	NA	8.62084	-57.2942	3.6816	246.73
814	La Paix	GG	ACS1-1/2	ACO1-1	CC	7.22094	-42.1128	4.18	260.622
508	Coast Apple	GT	ACS1-1/2	ACO1-1/2	CC	8.84687	-38.6043	5.4316	288.795
553	Belle Fille	TT	ACS1-1	NA	CC	NA	NA	NA	NA
1250	Kaz 95 06-08	GT	ACS1-1	ACO1-1	AA	6.74368	-42.7197	3.8628	246.512
1152	Williams	TT	ACS1-1/2	NA	AC	7.2512	NA	NA	239.015
394	American Summer Pearmain	GT	ACS1-1	ACO1-1	CC	8.25115	-43.1837	4.688	243.461
658	S29-08-17	GG	ACS1-1/2	ACO1-1	CC	7.87215	-36.1115	5.0294	267.692
82	Remura	GG	ACS1-1/2	NA	CC	7.12895	-48.7021	3.657	253.986
390	Aargauer Jubilaums	GT	ACS1-1	ACO1-1	CC	9.29558	-47.1899	4.909	282.651
960	Princesa	GT	ACS1-2	ACO1-1	CC	8.67775	-39.7425	5.229	274.692
777	Field Spy	GG	ACS1-1	ACO1-1	CC	9.92868	-44.4861	5.5118	276.165
580	GA6132	GG	ACS1-1	NA	CC	11.3302	NA	NA	281.692
877	Eurika	GT	ACS1-1	ACO1-1	AC	10.2107	-38.777	6.2513	267.744
112	Kaz 95 10-05F	GG	ACS1-1	ACO1-1	AC	9.85391	-31.5703	6.743	239.961
195	Poeltsamaa Winter Apple	GT	ACS1-1	NA	AC	10.689	NA	NA	253.692
522	Cheal's Golden Gem	NA	ACS1-1	NA	AC	NA	NA	NA	NA
430	Devonshire Quarrenden	GT	ACS1-1/2	ACO1-1	AC	7.18106	-44.7087	3.9705	229.461
265	KAS 58	GG	ACS1-1/2	ACO1-1	CC	7.45575	NA	NA	267.692
947	Paraquet	GG	ACS1-1/2	ACO1-1	CC	10.6502	-50.4777	5.2742	267.692
681	S38-06-140	GG	ACS1-1	ACO1-1	CC	7.70512	-48.6757	3.9546	261.134
1023	Merton Beauty	GG	ACS1-1	ACO1-1	AC	6.58662	NA	NA	253.965
262	Chehalis	GG	ACS1-1	ACO1-1/2	CC	4.70915	NA	NA	260.692
514	Dakota	GT	ACS1-1	ACO1-1/2	AC	7.10124	-50.5495	3.5116	254.397
492	Beforest	GG	ACS1-1/2	ACO1-1	AC	NA	NA	NA	NA
199	Barenhecke 3 x Klipphausen	TT	ACS1-1/2	ACO1-1	CC	13.9652	-6.0993	13.1134	282.194
545	Bongkushu (880626)	GT	ACS1-1	ACO1-1	CC	8.97998	-47.3317	4.7296	253.667
1142	Saltcote Pipin	GG	ACS1-2	ACO1-1/2	CC	8.83802	-54.4943	4.0218	268.315
331	KAS 48	GG	NA	NA	AC	7.38254	-41.6352	4.3088	257.382
939	Merton Delight	GG	ACS1-1/2	ACO1-1	AC	5.90975	-27.057	4.31075	239.466
791	Hotle Rome	GG	ACS1-1/2	ACO1-1	CC	9.90192	-46.7588	5.2719	282.021
117	Kaz 95 18-06	GT	ACS1-1	ACO1-1	NA	7.03428	NA	NA	260.76
1033	Marachal	TT	ACS1-1/2	ACO1-1	CC	9.34271	NA	NA	260.848
69	Regine	TT	ACS1-2	ACO1-1/2	CC	7.86502	8.49053	8.5328	275.021
602	S47-23-22	GG	ACS1-1	ACO1-1/2	CC	7.68612	NA	NA	257.352
833	Hoover	GG	ACS1-1	ACO1-1/2	CC	10.9743	NA	NA	269.165
540	Dukat	GT	ACS1-2	ACO1-1/2	CC	10.345	-30.339	7.2064	260.466
468	Ananas Berzenicki	GT	ACS1-1	ACO1-1	AC	8.49275	NA	NA	232.466
46	8C 18 30	GG	ACS1-2	ACO1-1	CC	10.0253	-39.2099	6.0944	261.021
1070	Nanot	TT	ACS1-1	ACO1-1	CC	8.90573	-38.6957	5.4596	271.396
236	Kogetsu	TT	NA	ACO1-1/2	CC	8.06715	-27.0895	5.8818	260.466
19	Crimson Crisp	TT	ACS1-2	ACO1-1/2	CC	11.4839	-23.5345	8.7812	264.559
478	Bob White	TT	ACS1-1	NA	CC	NA	NA	NA	NA
3	Enterprise	GT	ACS1-1/2	ACO1-1	CC	9.72131	-38.8395	5.9456	271.788
445	Atlas	GT	ACS1-1	ACO1-1	AC	NA	NA	NA	NA
988	Reveles Bumbierabols	GT	ACS1-1	ACO1-1	AA	4.56738	-27.788	3.2982	229.087
945	Pomme Thoury	GG	ACS1-2	ACO1-1	CC	11.6221	-23.7693	8.8596	269.165
1141	Tilsith	GT	ACS1-1	ACO1-1	AC	6.15787	NA	NA	229.294
589	Princesse	TT	ACS1-1	NA	CC	NA	NA	NA	NA
496	Bemali	GG	ACS1-1	ACO1-1	CC	NA	NA	NA	NA
817	Kile	GT	ACS1-1/2	ACO1-1/2	CC	7.73792	NA	NA	285.741
1111	Red Astrachan	GT	ACS1-1/2	ACO1-1	AA	NA	NA	NA	245.938
915	Lyons	TT	ACS1-2	ACO1-2	AC	7.40194	NA	NA	253.618
1035	Nubeena	GT	ACS1-1	ACO1-1	CC	13.417	-22.3971	10.412	288.578
373	C.P. Close	GT	ACS1-1	ACO1-1	AA	4.78955	-49.2698	2.42975	224.938
816	Jonared	TT	ACS1-1/2	ACO1-1/2	CC	8.88475	-41.8329	5.168	259.938
513	Anoka	GG	ACS1-1	ACO1-1	AC	5.57615	NA	NA	231.938
706	King Cole	GT	ACS1-1/2	ACO1-1/2	CC	8.40141	-17.2592	6.9514	274.841
296	KAR 101	GG	ACS1-1	ACO1-1	CC	8.80117	NA	NA	278.066
353	KAS 45	GT	ACS1-1	ACO1-1	CC	5.99737	NA	NA	250.318
572	Baxter	GG	ACS1-1	NA	CC	NA	NA	NA	NA
659	S23-04-05	GG	ACS1-1	ACO1-1	AC	NA	NA	NA	NA
314	KAS 56	GT	ACS1-1	ACO1-1/2	CC	NA	NA	NA	NA
1121	Manche Rouge	GT	ACS1-1/2	ACO1-1	AC	10.9386	-34.4796	7.167	240.698
86	SJC 686-1	GG	ACS1-1/2	ACO1-1/2	CC	8.87321	-36.9022	5.5988	274.51
687	S10-17-58	GT	ACS1-1	ACO1-1	AC	10.7037	NA	NA	268.745
352	KAR 30	GT	ACS1-1	ACO1-1	CC	7.35234	-45.2147	4.028	250.495
1239	Sinta	GG	ACS1-1/2	ACO1-1/2	CC	7.02741	-37.704	4.3778	271.387
594	S47-21-33	GG	ACS1-1	ACO1-1	CC	6.78064	NA	NA	250.456
584	Gala Must Regal Prince	GT	ACS1-2	ACO1-1/2	CC	8.77553	NA	NA	257.509
628	S47-21-84	GT	ACS1-1	ACO1-1	AC	6.11712	NA	NA	246.956
1155	Zoete Ermgaard	GT	ACS1-1	ACO1-1	CC	NA	NA	NA	NA
446	Cornish Gilliflower	GG	ACS1-2	NA	CC	9.59162	NA	NA	268.428
1072	Reine des Pommes	GT	ACS1-1/2	ACO1-1	CC	NA	NA	NA	NA
610	S47-25-72	GT	ACS1-1/2	ACO1-1	CC	8.09058	-25.7531	6.007	282.194
219	KAZ 96 06-01P-28	GT	ACS1-1	ACO1-1	AA	NA	NA	NA	NA
1274	Kaz 95 18-10	GG	ACS1-1	ACO1-1/2	AC	8.84337	-31.4356	6.0634	253.943
1197	Snow	GG	ACS1-1/2	ACO1-1	CC	6.91155	-42.4992	3.9742	260.692
872	Frequin Lacaille	GG	ACS1-1	ACO1-1	CC	NA	NA	NA	NA
167	Granny Smith	TT	ACS1-1/2	ACO1-1	CC	10.2198	-21.276	8.0454	281.692
713	Laxton's Fortune	GT	ACS1-1/2	ACO1-1/2	AC	NA	NA	NA	NA
222	Golden Delicious	GT	ACS1-1/2	ACO1-1	CC	8.69288	NA	NA	274.76
422	Brusnichnoe	GT	ACS1-1/2	ACO1-1	AA	7.54128	-39.7874	4.5408	232.726
835	Lambrook Pippin	GT	ACS1-1/2	ACO1-1/2	CC	9.33378	-31.4618	6.3972	282.651
1094	Lovell	GG	ACS1-1	ACO1-1	AC	7.25875	-56.1633	3.182	253.466
92	Cotton Candy	GG	ACS1-1/2	ACO1-1	AA	2.73932	NA	NA	240.298
1187	Spencer	GG	ACS1-1/2	ACO1-1	CC	8.45835	-47.3538	4.453	274.738
928	Marquesa	GT	ACS1-1/2	ACO1-1	CC	8.05335	-35.8031	5.17	274.466
380	Colby Baldwin	GT	ACS1-1/2	NA	CC	NA	NA	NA	NA
249	KAS 11	GG	ACS1-1	ACO1-1	AA	NA	NA	NA	NA
438	Beverly Hills	GG	ACS1-1	ACO1-1	AC	5.01792	-34.7539	3.274	247.284
325	KAS 42	GG	ACS1-1	ACO1-1	CC	NA	NA	NA	NA
501	Akin	GG	ACS1-1/2	ACO1-1	CC	10.4364	-41.1423	6.1426	267.466
1096	Redhook	GG	ACS1-1/2	ACO1-1	AC	8.45397	NA	NA	257.33
480	Blairmont	GT	ACS1-1/2	ACO1-1	AC	7.44631	-42.5729	4.2762	243.606
685	S19-15-03	GG	ACS1-1	NA	AC	6.99923	NA	NA	253.896
196	Domaine	GT	ACS1-1	ACO1-1	CC	10.7554	NA	NA	282.325
1110	Red Canel	GG	ACS1-1	ACO1-1/2	CC	6.91608	NA	NA	248.545
908	Feuillard	GT	ACS1-1	NA	AC	NA	NA	NA	NA
723	Frequin Audievre	GT	ACS1-1	ACO1-1	CC	10.3118	-21.4741	8.0974	267.466
994	Nittany	TT	ACS1-1/2	ACO1-1/2	CC	8.23555	NA	NA	267.466
200	GMAL 1750	GG	ACS1-1	ACO1-1	AA	9.56927	NA	NA	240.745
250	Orin	GT	ACS1-1/2	ACO1-1/2	CC	7.71328	-23.9364	5.867	278.113
592	Korona	GG	ACS1-1/2	ACO1-1	CC	6.17434	-54.0291	2.8384	250.079
892	Kerry Pippin	TT	ACS1-1/2	ACO1-1	AC	10.0634	NA	NA	238.938
187	Finson's Orange	GT	ACS1-1	ACO1-1	AC	NA	NA	NA	NA
703	Hardy Cumberland	GT	ACS1-2	ACO1-1/2	CC	8.97133	-33.9986	5.9212	278.131
1077	Puregold	GT	ACS1-1/2	ACO1-1	CC	8.20124	-18.5025	6.6838	278.118
137	Emilia	GT	ACS1-1	ACO1-1/2	CC	8.97367	-32.3309	6.0724	281.795
72	Arlet	GT	ACS1-1/2	ACO1-1/2	CC	8.61122	-34.6782	5.625	264.078
121	Kaz 95 09-02F	GT	ACS1-1	ACO1-1	AA	4.95824	NA	NA	243.079
83	Reglindis	GT	ACS1-1/2	ACO1-1	CC	8.61953	-47.1085	4.559	253.631
1007	Maunzenapfel	GT	ACS1-1	ACO1-1	CC	NA	NA	NA	NA
1299	KAZ 96 09-05	TT	ACS1-1	ACO1-2	AC	8.19288	NA	NA	260.76
789	Lande	GG	ACS1-1	ACO1-1	CC	10.3578	-23.6323	7.91	282.913
243	Hokuto	GT	ACS1-1/2	ACO1-1/2	CC	7.66368	-1.55906	7.5442	275.237
611	S47-21-25	GT	ACS1-1	ACO1-1	AC	6.86151	-36.8419	4.3336	243.52
307	KAR 84	GT	ACS1-2	ACO1-1	CC	9.02615	-30.6571	6.259	266.938
577	Cannonball	GG	ACS1-1/2	ACO1-1	AC	7.34802	NA	NA	254.241
21	Judeline	GT	ACS1-1/2	ACO1-1	CC	8.62635	-44.8504	4.7574	259.938
798	Hall Keeper	GG	ACS1-1	ACO1-1	CC	11.871	-31.2966	8.1558	285.52
1050	Notaire	GT	ACS1-1	ACO1-1/2	CC	9.60178	-39.1217	5.8454	260.931
643	S29-13-73	GG	ACS1-1	ACO1-1	CC	10.3985	-30.8147	7.1942	254.08
999	Muz-alma	GT	ACS1-1/2	ACO1-1	CC	NA	NA	NA	NA
133	Banon's Seedling	GT	ACS1-1/2	ACO1-1	AC	10.9606	-38.5072	6.74	239.584
599	S47-25-41	GT	ACS1-1	ACO1-1	AC	5.79238	NA	NA	243.842
1019	Red Dijmanszoet	GG	ACS1-1	ACO1-1	CC	NA	NA	NA	NA
431	Arkansas	GG	ACS1-1	ACO1-1	CC	NA	NA	NA	NA
490	Benitts Roter Finkenwerde	GT	ACS1-1/2	ACO1-1	CC	9.80167	NA	NA	261.745
769	Galicia	GT	ACS1-1/2	ACO1-1	CC	8.56823	-39.5091	5.183	253.584
1083	Reinette d' Anjou	GT	ACS1-1/2	NA	CC	8.44685	-36.2662	5.3835	281.833
926	Oswego	GT	ACS1-1	ACO1-1	CC	8.92223	-39.8544	5.36633	288.584
578	Astrachan	GG	ACS1-1/2	ACO1-1	AC	4.47383	NA	NA	239.584
848	Jakob Fischer	GT	ACS1-1	ACO1-1	NA	8.37107	NA	NA	241.11
962	Mleevskaya Crasavitsa	GT	ACS1-1	ACO1-1	CC	9.28563	-35.5779	5.982	281.584
871	Honora	GG	ACS1-1	ACO1-1	AC	6.48232	NA	NA	257.431
414	Alnarp 2	GT	ACS1-1	ACO1-1	AC	NA	NA	NA	NA
657	S47-23-52	GG	ACS1-1	ACO1-1	AC	5.69537	-34.1957	3.7478	232.954
429	Belle de Crollon	GT	ACS1-1/2	ACO1-1	CC	NA	NA	NA	NA
44	SJCA 16R5A15	GT	ACS1-1/2	ACO1-1/2	CC	7.00535	-39.1251	4.2645	257.407
385	Bonum	GG	ACS1-1	ACO1-1	CC	10.4294	-47.8648	5.4374	281.584
970	Ottawa 546	GT	ACS1-1/2	ACO1-1	CC	9.74827	-48.5345	5.017	275.745
453	Canavial-14	GT	ACS1-1	ACO1-1/2	CC	9.80866	-46.221	5.275	282.517
552	Diana	GT	ACS1-1/2	NA	AC	6.13227	-40.151	3.6701	246.324
570	Bowden Seedling	TT	ACS1-1/2	ACO1-1/2	CC	7.72225	-28.7599	5.50133	275.148
228	Reinette Russet	TT	ACS1-1	NA	NA	9.98527	NA	NA	275.082
743	Liaofu	GG	ACS1-1	ACO1-1	AC	NA	NA	NA	NA
73	Trent	GT	ACS1-1	ACO1-1	CC	11.1464	-40.2302	6.6622	281.489
1089	Ogden	GT	ACS1-1	ACO1-1	AC	NA	NA	NA	NA
1195	Sunset	GG	ACS1-1	ACO1-1	CC	8.69437	NA	NA	260.907
336	KAR 2	GG	ACS1-1	ACO1-1/2	CC	8.97575	-45.57	4.8855	268.009
447	Creamy Kitaika	NA	ACS1-1	NA	AA	NA	NA	NA	NA
344	KAR 36	TT	ACS1-1	ACO1-1/2	AC	7.57808	NA	NA	253.489
537	Binet Rouge	GT	ACS1-1	ACO1-1	CC	11.0753	-35.0679	7.1914	278.407
1000	Paradis do Vayre	GT	ACS1-1	ACO1-1/2	CC	12.4528	-32.918	8.3536	285.142
201	KAZ 96 07-04	GT	ACS1-1	ACO1-1	AA	NA	NA	NA	NA
56	Zestar	TT	ACS1-2	ACO1-1	AC	5.48503	NA	NA	253.489
943	Red Canada	GT	ACS1-1	ACO1-1	CC	9.91507	NA	NA	282.23
256	Boughsweet	GG	ACS1-1	NA	AC	NA	NA	NA	NA
386	Coombs Wealthy	TT	ACS1-1/2	NA	AC	NA	NA	NA	NA
399	Cleopatra	GT	ACS1-1/2	ACO1-1	CC	9.93375	-48.0096	5.1646	282.117
330	KAR 92	GG	ACS1-1	ACO1-1	CC	6.85572	NA	NA	243.394
375	Dekkers Glorie	GT	ACS1-1	ACO1-1	CC	8.51158	-46.487	4.5548	254.651
1215	Vogelcalville	GG	ACS1-1/2	ACO1-1	CC	9.37887	-31.8532	6.3914	260.795
746	Gladstone	GT	ACS1-1/2	ACO1-1	AC	NA	NA	NA	NA
1301	Niedzwetzkyana	GG	ACS1-1	ACO1-1	CC	9.70405	-53.5864	4.504	253.982
1069	McClintock Grimes	GT	ACS1-1/2	ACO1-1	CC	9.55176	-40.4884	5.6844	254.382
80	SJC 8428-2	GG	ACS1-1	ACO1-1/2	CC	6.81763	-46.6472	3.6374	267.219
937	Ohio Nonpareil	GG	ACS1-1	ACO1-1	CC	8.94385	-37.4766	5.592	281.724
954	Quebec Belle	GT	ACS1-1/2	ACO1-1/2	CC	7.9846	-34.4589	5.2332	281.707
1294	KAZ 96 09-01P-2	GT	ACS1-1/2	ACO1-1	CC	NA	NA	NA	NA
929	Montgomery	GG	ACS1-1	ACO1-1	AC	6.07816	NA	NA	246.49
32	Shizuka	GT	ACS1-1/2	NA	CC	8.08335	-40.2847	4.827	278.332
920	Ottawa 274	GG	ACS1-1/2	ACO1-1	AC	5.21923	NA	NA	225.219
1189	Worcester Pearmain	GG	ACS1-1	ACO1-1	CC	6.52967	NA	NA	243.007
773	Korobovka	GT	ACS1-1	ACO1-1	AA	NA	NA	NA	NA
194	Spokane Beauty	GG	ACS1-1	ACO1-1	CC	9.36543	NA	NA	281.219
1256	Kaz 95 09-05F	GT	ACS1-1	NA	AA	7.77452	NA	NA	240.22
869	Foxwhelp	GT	ACS1-1	ACO1-1	CC	NA	NA	NA	NA
452	Britemac	GG	ACS1-1	ACO1-1	CC	7.53605	-51.4228	3.6608	254.165
81	Freedom	GT	ACS1-1/2	ACO1-1	AC	8.37266	NA	NA	257.882
439	Blenheim Orange	GT	ACS1-1	ACO1-1	CC	8.67688	NA	NA	274.76
495	Early Joe	GG	ACS1-1	NA	AA	NA	NA	NA	NA
210	KAZ 93-42-01	GT	ACS1-1	ACO1-1/2	AA	NA	NA	NA	NA
164	Delicious	GT	ACS1-1/2	ACO1-2	CC	8.53185	NA	NA	281.907
76	Redstarkingvale	GT	ACS1-1/2	ACO1-2	CC	9.30866	NA	NA	279.722
689	S19-10-04	GG	ACS1-1	ACO1-1	CC	8.05388	-58.9059	3.30967	254.237
575	Ottawa 665	GG	ACS1-1	ACO1-1	CC	7.70206	-40.3432	4.5948	263.958
648	S29-05-38	GG	ACS1-1	ACO1-1	AA	NA	NA	NA	NA
253	Sayaka	TT	ACS1-1/2	ACO1-1/2	CC	7.74648	NA	NA	264.65
271	Rogers Mac	TT	ACS1-2	ACO1-1	AC	6.85903	-37.9329	4.2572	239.584
52	Kensei	TT	ACS1-2	ACO1-1/2	CC	8.59767	-10.9945	7.6524	282.745
1164	Signe Tillisch	GG	ACS1-1/2	ACO1-1	CC	6.90718	NA	NA	254.194
1021	Messire Jacques	GT	ACS1-1	ACO1-1	CC	NA	NA	NA	NA
504	Doux Normandie	GG	ACS1-1	ACO1-1	CC	NA	NA	NA	NA
37	SJCA 14R3A108	TT	ACS1-1/2	ACO1-1	CC	8.08063	NA	NA	253.584
863	Golden Nugget	GG	ACS1-1/2	ACO1-1	CC	6.91094	NA	NA	268.117
93	K: 1107	GG	ACS1-1	ACO1-1	CC	8.30588	-50.3219	4.1262	255.545
940	Oriole	GT	ACS1-1/2	ACO1-1	AC	NA	NA	NA	NA
704	Joan	GG	ACS1-1/2	ACO1-1	AC	7.80147	-43.062	4.442	278.53
661	S47-21-24	GT	ACS1-1	ACO1-1	CC	8.18183	NA	NA	260.489
1059	Rougemont	GT	ACS1-1/2	ACO1-1	NA	5.38195	NA	NA	243.467
404	Alpinist	TT	ACS1-1/2	ACO1-1	CC	NA	NA	NA	NA
402	Crollon	GG	ACS1-1	ACO1-1	AC	NA	NA	NA	NA
1235	S14-15-72	NA	NA	NA	NA	7.91367	-33.8664	5.2336	253.795
637	S20-07-41	GT	ACS1-1/2	ACO1-1	NA	6.28543	-35.1675	4.075	246.489
987	Red Spy	GG	ACS1-1	ACO1-1	CC	8.97295	NA	NA	290.263
1233	Ribston	GT	ACS1-1/2	ACO1-1	CC	9.4008	-53.3806	4.3826	261.094
450	Collamer Twenty Ounce	GG	ACS1-1/2	ACO1-1	CC	6.98983	NA	NA	260.489
774	Lakeland	TT	ACS1-2	ACO1-1/2	AC	7.59152	-53.2241	3.551	256.901
568	Annie Elizabeth	GT	ACS1-2	ACO1-1/2	CC	NA	NA	NA	NA
1201	Nova Russet	GT	NA	ACO1-1	CC	9.30555	-33.4483	6.193	275.3
1104	Rose de Benauge	TT	ACS1-1	ACO1-1	CC	10.5494	NA	NA	288.489
211	GMAL 3244	GG	ACS1-1	NA	AC	NA	NA	NA	NA
720	Korallo	GG	ACS1-1/2	ACO1-1	CC	7.98538	-37.7412	4.9716	268.194
1087	Peypring Cerueuko	GG	ACS1-1	ACO1-1	CC	NA	NA	NA	NA
1042	Roter Eiserapfel	NA	NA	NA	NA	9.79423	-40.3894	5.8384	260.489
567	Bietigheimer	GT	ACS1-1	ACO1-1	NA	8.03608	NA	NA	253.489
641	S23-03-20	GG	ACS1-1	ACO1-1	CC	NA	NA	NA	NA
427	Blair	GG	ACS1-1	ACO1-1	CC	7.15975	NA	NA	253.724
487	Belle Norman	GG	ACS1-1	ACO1-1	CC	NA	NA	NA	NA
1271	Kaz 95 18-04	GT	ACS1-1	ACO1-1	AC	13.1184	-48.9131	6.7018	253.219
654	S12-31-18	GG	ACS1-2	ACO1-1/2	CC	8.56206	-48.4913	4.4102	281.728
971	Niagara	GG	ACS1-1/2	ACO1-1	AC	8.6155	-46.7054	4.5916	253.707
1043	Lubec #1	GG	ACS1-1	ACO1-1	CC	6.95823	NA	NA	260.219
563	Dunning	GG	ACS1-1/2	ACO1-1	AC	6.79571	-44.5768	3.7664	240.325
170	KAZ 96 07-10	GT	ACS1-1	NA	AA	NA	NA	NA	NA
950	Reta	GG	ACS1-1	ACO1-1	AC	8.90735	-52.0755	4.2688	260.65
482	Court Royal	GT	ACS1-1	NA	CC	NA	NA	NA	NA
14	CBR 4T 29	GT	ACS1-1/2	ACO1-1	CC	9.66038	-17.9804	7.9234	274.72
1148	Teign Harvey	GT	ACS1-1	ACO1-1	CC	9.07143	-45.3118	4.961	253.219
1031	Malt Bagaevskii	TT	ACS1-1	NA	AA	6.82207	NA	NA	236.363
197	GMAL 2251	GT	ACS1-1	NA	AA	9.02648	NA	NA	249.99
874	Kemp	TT	ACS1-1	ACO1-1	CC	NA	NA	NA	NA
1024	Pederstrup	GT	ACS1-1	ACO1-1	CC	7.28365	NA	NA	276.101
160	Fuji Red Sport Type 2	TT	ACS1-2	ACO1-2	CC	8.68677	-14.4446	7.432	285.661
786	Geoagiu 21	GT	ACS1-1/2	NA	CC	9.18268	-40.2244	5.489	253.76
300	KAR 105	GG	ACS1-1/2	ACO1-1	AC	7.96003	-50.3739	3.95025	253.219
1151	Wainwright	GT	ACS1-1	NA	CC	NA	NA	NA	NA
232	Senshu	TT	ACS1-2	ACO1-1/2	CC	7.39443	-18.3947	6.03425	281.584
306	KAR 89	TT	ACS1-1	ACO1-1	AC	10.3316	NA	NA	267.584
512	Bedford Red	GT	ACS1-1/2	ACO1-1/2	CC	8.33567	-53.014	3.9166	282.23
1009	Pixie	GT	ACS1-1/2	ACO1-1	CC	10.3144	-36.4929	6.5504	289.112
410	Dufflin	GT	ACS1-1	ACO1-1/2	CC	NA	NA	NA	NA
632	S47-25-48	GG	ACS1-1/2	ACO1-1	CC	9.32408	-45.8714	5.047	276.165
451	Damelot	GT	ACS1-1/2	ACO1-1	CC	11.3214	-44.4046	6.2942	267.584
533	Crookston	GT	ACS1-1/2	ACO1-1	AC	7.97629	NA	NA	243.296
596	S42-38-04	GG	ACS1-1	ACO1-1	CC	8.6319	-50.5864	4.26533	264.641
26	Priam	GG	ACS1-1/2	ACO1-1	CC	8.62925	NA	NA	254.014
903	Golden Uralian	TT	ACS1-1	ACO1-1	AA	7.08635	NA	NA	226.009
185	KAZ 96 08-15	GG	ACS1-1	ACO1-1	CC	10.0137	-41.1494	5.8931	246.672
382	Democrat	GT	ACS1-1	ACO1-1	CC	10.0545	-24.7382	7.5672	281.889
881	Julyred	GG	ACS1-1	ACO1-1	AC	2.28416	NA	NA	239.584
906	Kaiser Wilhelm	GT	ACS1-1	ACO1-1	CC	9.12195	-28.0001	6.5678	278.665
983	Pigeonnet	GT	ACS1-1/2	ACO1-1	CC	11.2182	-15.7176	9.455	288.584
188	Jonamac	GT	ACS1-1/2	ACO1-1/2	CC	7.48023	-53.5442	3.475	260.584
1132	Yellow Delicious	GT	ACS1-1/2	ACO1-1	CC	8.33035	-28.0847	5.9908	289.009
762	Le Bret	GG	ACS1-1/2	ACO1-1	CC	NA	NA	NA	NA
1056	Renetta Dorata	GT	ACS1-1	ACO1-2	CC	9.71068	NA	NA	274.76
1134	Royal Jersey	TT	ACS1-1	ACO1-1	CC	11.6508	-16.7562	9.6986	260.489
354	KAR 17	GT	ACS1-1/2	NA	AC	8.39243	NA	NA	260.489
1259	Kaz 95 10-03F	GT	ACS1-1	ACO1-1	NA	3.88123	-15.2382	3.2898	246.489
579	S29-13-72	GG	ACS1-1/2	ACO1-1	CC	7.25818	-50.128	3.6198	260.894
135	Stayman	GT	ACS1-1	NA	CC	10.1489	-49.5658	5.1185	281.795
1149	Vienna	GG	NA	ACO1-1	CC	9.80027	NA	NA	260.907
1114	Oldenburg	GT	ACS1-1/2	ACO1-1	CC	NA	NA	NA	NA
709	Hibernal	GG	ACS1-1	ACO1-1	NA	6.91963	-50.1744	3.44775	246.489
288	KAS 50	GG	ACS1-1/2	NA	CC	6.64083	NA	NA	253.489
264	KAS 62	GG	ACS1-1/2	ACO1-1	CC	NA	NA	NA	NA
1276	Kaz 95 18-14	GT	ACS1-1	ACO1-1	CC	12.2866	-46.3034	6.5975	265.463
459	Drakenstein	TT	ACS1-1	ACO1-1/2	CC	8.38999	-24.7389	6.3144	257.384
829	Keegan's Crab	GT	ACS1-2	ACO1-1	AC	4.13123	NA	NA	239.489
693	S19-12-42	GT	ACS1-1	ACO1-1	AC	7.77897	-50.9627	3.8146	254.296
615	S42-61-05	GG	ACS1-1	ACO1-1	AA	NA	NA	NA	NA
719	Lindel	GG	ACS1-1/2	NA	CC	9.69833	NA	NA	281.489
154	Clivia	GT	ACS1-2	ACO1-1	CC	9.37643	-41.8329	5.454	260.489
337	KAR 34	GT	ACS1-1	ACO1-1	CC	9.84807	NA	NA	268.745
381	Carola	GT	ACS1-1/2	ACO1-1	CC	8.26983	NA	NA	260.489
474	Cheddar	GG	ACS1-1	NA	AC	5.43303	NA	NA	239.219
209	Smith Jonathan	TT	ACS1-1/2	ACO1-1/2	CC	7.60363	-24.2651	5.7586	281.219
1026	Noel Deschamps	GT	ACS1-1	ACO1-1	CC	13.2041	-52.654	6.2516	278.66
732	Jubillee	GT	ACS1-1	NA	CC	9.89188	-32.1221	6.7144	282.16
374	Bisbee	GT	ACS1-1/2	ACO1-2	CC	8.1724	-14.6836	6.9724	278.075
315	KAR 51	GT	ACS1-1/2	ACO1-1/2	CC	8.3551	-42.0275	4.84367	267.575
1169	Stembridge Cluster	GG	ACS1-1/2	ACO1-1	CC	NA	NA	NA	NA
1221	Greensleeves	GG	ACS1-1	ACO1-1	AC	6.67687	-66.2537	2.2532	240.082
278	KAR 91	TT	ACS1-1	ACO1-1	AA	5.25842	NA	NA	240.279
406	Bisbee Giant Winesap	GT	ACS1-1/2	NA	CC	9.0275	-39.4052	5.4702	285.363
23	Rebella	TT	ACS1-2	ACO1-1/2	CC	7.91428	NA	NA	250.66
172	GMAL 3265	GT	ACS1-1	ACO1-1	AC	NA	NA	NA	NA
387	Charles Ross	GG	ACS1-2	ACO1-1	CC	10.1784	NA	NA	253.219
730	Gold Canel	GT	ACS1-1	ACO1-1	AA	NA	NA	NA	NA
1066	Mingan	GT	ACS1-1	ACO1-1/2	CC	7.40963	-43.1416	4.213	281.219
326	Evangeline	GG	ACS1-1	ACO1-1	CC	7.60435	-26.9024	5.5586	271.15
485	Caravel	GG	ACS1-1	ACO1-1	AA	5.89438	-39.9054	3.5422	229.22
897	Kamsomolez	TT	ACS1-1	ACO1-1	AC	10.676	-14.5699	9.1205	246.931
1071	Red Cinnamon	GT	ACS1-1/2	ACO1-1/2	CC	10.1267	-24.8502	7.6102	276.103
1136	Vilberie	GT	ACS1-1	ACO1-1	CC	NA	NA	NA	NA
