# Supplementary material for: Apple Ripening Is Controlled by a NAC Transcription Factor
Source: Front Genet. 2021 Jun 22;12:671300. doi: 10.3389/fgene.2021.671300 (PMC8258254; doi:10.3389/fgene.2021.671300)
Supplement: Supplementary Figure 1 — Correlations among phenotypes. The distributions of each phenotype are shown as well as dot plots of comparisons between each pair of phenotypes. The results of a Pearson correlation test are provided for each pairwise comparison. [file Data_Sheet_1.zip › Supplementary files/Supp Tables/Table 3.fasta]

>MD11G1239900
GTCCAATTGATCTTAGTCTCTCCCATGGTTTCTTGGTGAAGTGGGGTCCTTGTCAAAAATTGGCGGTATTATGCGCTACAAAAGCATGACAACTGAAGCATAAAGCTTGTTCCCACCCCAGACTTATCCGTCTATATCTTTTTGTTACCTTGTGTGGTCTGTGGGCCCCACCTCACCTCACAGTACACGTGTCGTTCTCTCTCACGTTTGCGAATTACACGTGTTGGCCTATCAACGGCCCACCTTCCAGTTCGCGTCGTCCTAGGGTTTCCATCACCTCCATATCCCCATGACCTCACTTTCTCTCCCTCTCCCTAGGCTAACCACCACAAAGTCACTCTCAATCCCATGCTCAAAATTAGGCCACCTCCGTAATCATGATTAACGCAGTAATTATACATCTCATAAACTGTCTAATCTACCCCTGATCCCGTTACGTGGCCTTCTACCATTGGTTCCATTGTTTAAAAACCATGCAGGCAACTGCAGCTCGATATTCCCCTTCACATACTTAAAACAGGGGCCCTGCAAGTCTGCCACCTCCAAACGACATTTAAAGCTTTATATGTAAATTGTGTGATATGTAATATGTGCTTGGCTGCAAAGGAACCCTCCGAACCCATAAACCAAAGATGGAGAGCACCGACTCGTCAACGGGCTCACAACAGCAGCAGCTGCAGCCGCCACAGCCACCACCTCCTCCGCTGCCAAACCTCCCACCTGGGTTCCGCTTCCACCCGACAGATGAAGAGCTAGTTGTCCACTATCTCAAGAAAAAGGCCACCTCCGCTCCCCTTCCGGTTTCCATCATCGCTGACGTCGACCTTTACAAGTTCGACCCCTGGGAGCTCCCAGGTATGCACGAAATTAAATTTCTTGCATACGGCAGGTGTATATAAAATTCTTTCTTATAACATGTGTATATATGTTACCGACAACAATAATACTGATTGTATTATGTGTTTCCTTCTTTTTCGTTTTTCTTTCTTGGTTCAGCTAAGGCTACGTTTGGAGAGCAAGAGTGGTATTTTTTCAGTCCTAGGGACCGGAAATACCCGAACGGAGCGAGACCAAATAGGGCGGCGACTTCCGGGTATTGGAAGGCGACGGGGACTGATAAGCCGGTGCTGACTTCCGGCGGTATTCAGAAAGTTGGTGTGAAAAAAGCACTTGTGTTCTATGGAGGAAAACCCCCGAAAGGAATTAAAACCAATTGGATTATGCACGAGTACAGGCTTGCTGATAACAAGCCCAACAACAAACCACCAGGGTGTGACTTGGGCAACAAGAAGAACTCCTTGAGGGTAATCCAGAACTAAGCACTTCTATAATAGTTCACTAATGATATTTAAATTTGGTTTTTGGACCCCATGGTAGAATTTGTACGTACGTTTTATTTGTTAATTTAATTTGGAGATTAATAAATTGAATTAATGTGTTTTTGTTTATGTGTAGCTTGATGATTGGGTGCTGTGTAGAATTTACAAGAAGAACAACACACATAGGCCGATGGATCATGAGAGGGAGGATTCCATGGAGGACATCTTGGGACCGTTGATGCCACCATCTATAAGTCATGTGGGCCACCATCAGAATATGAAGCTGCACCTTCCAAAGTCTAATTTGAGTTATGGGCCGCCTTTCATGGAAAATAACCAAATTTTTTTTGACGGGATGATGAGCAGCACCGACGGATCGGCTTCTACTCATCAGCTGCCACAAAAACGGCCAATAGTTCCATCCCTGTACTGGAATAATCAGGAGGAGGATGACCAGACGGCTGCTGATCCTTCATCAAGCAAGAGAATACAACTACACCAATTGGACACTGGTACTAATTCTAATGGTGATGGGATTAATGGCGGTGCTACTAATAACAATTCTACTTCTATTGCCAATCTACTTTCCCAGCTTCCTCAGACTCCACCATTGCACCAACATGCAGTATTGGGGTCACTTGGCGACGGTCTATTCCGGACGCCGTATCAACTGCCTGGGAGGAATTGGTATTCTGACTCCAATTTGGGATAGAGGGTTGATGAATTTGATGATTATGG
>MD03G1222600
ATTAGAGAAATTTTTCAATGTGACAGGAACACAGAGCATAACACCATATATCATTATATTATTAAAAGAACACTTAAAAAAACTTTTCTCCAATTAAATTATGACATACAATATTCTGATTCGTATTCTAACACTTAAAAAAAACTTTTCTCCAATTAAATTATGACATACAATGTTCTGATTCATATTCCAGCCAAAAATCTCTCGTCCAATTCATCATGTAGTCTCTCCAATGGGTTGTTGGTGGGGTCCTTGGCAAAATTGGTGCTATTTTTGCGCAATAAAAGCATGACAACTTTTTTTTATCGCTTCTGTAAAAAAAAAAAGCATGACATCTGAAGCGTAATGCTTGTTCCCACCCCAGGCTTATCCGTCTGTATAATTTTGTTGCCTCGCGTGGTCCGTGGGCCCCACGGAAGTCCACCACACGTGTCGACCTTTCTCTCGTTTTCGAATTACACGTGTCGGCCTATCAACGGCCCACTTTTCAGTTCGCTTCGTCCTAGGGTTTTCCATCACCTCCATATCCCCTTTCCCTACCTGTCCCTATGCTAACCACCACACAGTCACTCTCAATCCCATGCACAAAATTAGGCCCCCGCCTTAATCATGGTTAACGAAGTAATTACACATCATATAAAATGGCTAATCTACCCTGATCCCATTACGTGGCCTTGACCATTGGTTCCCTAGTTTAAAAACCATGCAGGCAACTGCAGCGGAATATTGCCCCCTCACATACTTAAAACAGGGGCCCTGCCAGTCTGCCACCTCCAAACGACATTGAAGGTCTATATGTAATATGTGCTTGGCTGCACAGAAACCCTCCGAACCCAATAACCAAGGATGGAGTGCACCGACTCGTCCGCGGGCTCACAACAGCAACAGCACCAGCAGCCGCCACCTCCGCAGCCAAACCTGCCGCCCGGGTTCCGCTTCCACCCGACGGACGAAGAGCTAGTCGTCCACTATCTCAAGAAAAAGGCCACCTCCGCTCCCCTCCCGGTTGCTATTATCGCTGAAGTCGACCTTTACAAGTTCGACCCCTGGGAGCTCCCAGGTATGCGTGAAATTATAATTCTTGTATTCAACATGTGTATAAAATTATTGCATACAACAAGTGTGTATAATATTATCGACAACAATAAACTGATTATATTATTTGTTTTCTTCTTTTTTCCTCTTTTCTTTATTTGTGCAGCTAAGGCTACGTTTGGAGAGCAAGAGTGGTATTTTTTCAGTCCTAGGGACCGGAAGTACCCGAACGGAGCGAGACCCAATAGGGCAGCGACTTCCGGGTATTGGAAAGCGACGGGGACTGATAAGCCGGTGCTGACTTCCGGCGATACTCAGAAAGTTGGTGTGAAAAAAGCACTTGTGTTCTATGGAGGAAAACCCCCAAAAGGAATTAAAACCAATTGGATTATGCACGAGTACAGGCTTGCTGATAACAAGCCCAACAACAAGCCACCTGGGTGTGACTTGGGCAACAAGAAGAACTCCATGAGGGTAATCCAACACTAAGCACGTGTATAATTAACTGATTAATTGATTAATGATATTTAAATTGGTTTTTTGTACCCCATGGTATCATTGGTACTTACCTTTTATTTGTTAATTTAATTTGGAGATTAGTAAATTGATTAATATGTTTGTGTTCATGTAGCTTGATGATTGGGTGCTGTGTAGAATTTACAAGAAGAACAACACGCATAGGCCGATGGATCATGAGAGGGAGGATTCCATGGAGGACATAATGGGACCATTGATGCCACCATCCATAAGTCATGTGGGCCACCATCAGAATATGAAGCTGCACTTTCCAAAATCTAATTCGAGTTATGGACCGCCTTTCATGGAAAATGACCAAATATTTTTTGATGGGATAATGAGCAGCACCGACGGATCAGCTTCTACTCATCAGCTGCAACTAAAACGGCCAATAGTTCCATCTTGGTACTGGAATAATCAGGAAGATGATCAGACGGCTGCTGATCCTTCATCAAGCAAGAGAATACAACTGCACCAATTGGACAATGGTACTAATTCTAATGGTGCTGGGATTAATGGTGGTTCTACAAATAACAATTCTAGTTCTATTGCCAATCTACTTTCCCAGCTTCCACAGACGCCACCATTGCACCAACATGCAGTTCTGGGGTCACTTGGCGACGGTATATTCCGGACGCCATATCAACTGCCTGGAATGAATTGGTATTCTGAGTCCAATTTGGGATAGAGGGTTGATGAATTTGATGATTTATGG
>Circassian_Apple
ATTAGAGAAATTTTTCAATATGACAGGAACACAGAGCATAACACCATATATCATTATATTATTAAAAGAACACTTAAAAAAACTTTTCTCCAATTAAATTATGACATACAATGTTCTGATTTGTATTCTAACACTTCAAAAAAACTTTTCTCCAATTAAATTATGACATACAATGTTCTGATTCATATTCCAGCCAAAAATCTCTCGTCCAATTCATCATGTAGTCTCTCCAATGGGTTGTTGGTGGGGTCCTTGGCAAAATTGGTGCTATTTTTGCGCAATAAAAGCATGACAACTTTTTTTTATCGCTTCTGTCAAAAAAAAAAGCATGACATCTGAAGCGTAATGCTTGTTCCCACCCCAGGCTTATCCGTCTGTATAATTTTGTTGCCTCGTGTGGTCCGTGGGCTCCACGGAACGTCCACCACACGTGTCGACCTTTCTCTCGTTTTCGAATTACACGTGTCGGCCTATCAACGGCCCACTTTTCAGTTCGCTTCGTCCTAGGGTTTTCCATCACCTCCATATCCCCTTTCCCTACCTGTCCCTATGCTAACCACCACACAGTCACTCTCAATCCCATGCACAAAATTAGGCCCTCGCCTTAATCATGGTTAACGAAGTAATTACACATCATATAAAATGGCTAATCTACCCTGATCCCATTACGTGGCCTTGACCATTGGTTCCCTAGTTTAAAAACCATGCAGGCAACTGCAGCGGAATATTGCCCCCTCACATACTTAAAACAGGGGCCCTGCCAGTCTGCCACCTCCAAACGACATTGAAGGTCTATATGTAATATGTGCTTGGCTGCACAGAAACCCTCCGAACCCAATAACCAAGGATGGAGTGCACCGACTCGTCCGCGGGCTCACAACAGCAACAGCACCAGCAGCCGCCACCTCCGCAGCCAAACCTGCCGCCCGGGTTCCGCTTCCACCCGACGGACGAAGAGCTAGTCGTCCACTATCTCAAGAAAAAGGCCACCTCCGCTCCCCTCCCGGTTGCTATCATCGCTGAAGTCGACCTTTACAAGTTCGACCCCTGGGAGCTCCCAGGTATGCGTGAAATTATAATTCTTGTATTCAACATGTGTATAAAATTATTGCATACAACAAGTGTGTATAATATTATCGACAACAATAAACTGATTATATTATTTGTTTTCTTCTTTTTTCCTCTTTTCTTTATTTGTGCAGCTAAGGCTACGTTTGGAGAGCAAGAGTGGTATTTTTTCAGTCCTAGGGACCGGAAGTACCCGAACGGAGCGAGACCCAATAGGGCAGCGACTTCCGGGTATTGGAAAGCGACGGGGACTGATAAGCCGGTGCTGACTTCCGGCGATACTCAGAAAGTTGGTGTGAAAAAAGCACTTGTGTTCTATGGAGGAAAACCCCCAAAAGGAATTAAAACCAATTGGATTATGCACGAGTACAGGCTTGCTGATAACAAGCCCAACAACAAGCCACCTGGGTGTGACTTGGGCAACAAGAAGAACTCCTTGAGGGTAATCCAACACTAAGCACGTGTATAATTAACTGATTAATTGATTAATGATATTTAAATTGGTATTTTGTACCCCATGGTATCATTGGTACTTACCTTTTATTTGTTGATTTAATTTGAAGATTAGTAAATTGATTAATATGTTTGTGTTCATGTAGCTTGATGATTGGGTGCTGTGTAGAATTTACAAGAAGAACAACACGCATAGGCCGATGGATCATGAGAGGGAGGATTCCATGGAGGACATAATGGGACCATTGATGCCACCATCCATAAGTCATGTGGGCCACCATCAGAATATGAAGCTGCACTTTCCAAAATCTAATTCGAGTTATGGACCGCCTATCATGGAAAATGACCAAATATTTTTTGATGGGATAATGAGCAGCACCGACGGATCAGCTTCTACTCATCAGCTGCAACTAAAACGGCCAATAGTTCCATCTTGGTACTGGAATAATCAGGAAGATGATCAGACGGCTGCTGATCCTTCATCAAGCAAGAGAATACAACTGCACCAATTGGACAATGGTACTAATTCTAATGGTGCTGGGATTAATGGTGGTTCTACAAATAACAATTCTAGTTCTATTGCCAATCTACTTTCCCAGCTTCCACAGACGCCACCATTGCACCAACATGCAGTTCTGGGGTCACTTGGCGACGGTATATTCCGGACGCCATATCAACTGCCTGGAATGAATTGGTATTCTGAGTCCAATTTGGGATAGAGGGTTGATGAATTTGATGATTTATGG
>Bouteille
ATTAGAGAAATTTTTCAATGTGACAGGAACACAGAGCATAACACCATATATCATTATATTATTAAAAGAACACTTAAAAAAACTTTTCTCCAATTAAATTATGACATACAATATTCTGATTCGTATTCTAACACTTAAAAAAAACTTTTCTCCAATTAAATTATGACATACAATGTTCTGATTCATATTCCAGCCAAAAATCTCTCGTCCAATTCATCATGTAGTCTCTCCAATGGGTTGTTGGTGGGGTCCTTGGCAAAATTGGTGCTATTTTTGCGCAATAAAAGCATGACAACTTTTTTTTATCGCTTCTGTAAAAAAAAAAAGCATGACATCTGAAGCGTAATGCTTGTTCCCACCCCAGGCTTATCCGTCTGTATAATTTTGTTGCCTCGCGTGGTCCGTGGGCCCCACGGAAGTCCACCACACGTGTCGACCTTTCTCTCGTTTTCGAATTACACGTGTCGGCCTATCAACGGCCCACTTTTCAGTTCGCTTCGTCCTAGGGTTTTCCATCACCTCCATATCCCCTTTCCCTACCTGTCCCTATGCTAACCACCACACAGTCACTCTCAATCCCATGCACAAAATTAGGCCCCCGCCTTAATCATGGTTAACGAAGTAATTACACATCATATAAAATGGCTAATCTACCCTGATCCCATTACGTGGCCTTGACCATTGGTTCCCTAGTTTAAAAACCATGCAGGCAACTGCAGCGGAATATTGCCCCCTCACATACTTAAAACAGGGGCCCTGCCAGTCTGCCACCTCCAAACGACATTGAAGGTCTATATGTAATATGTGCTTGGCTGCACAGAAACCCTCCGAACCCAATAACCAAGGATGGAGTGCACCGACTCGTCCGCGGGCTCACAACAGCAACAGCACCAGCAGCCGCCACCTCCGCAGCCAAACCTGCCGCCCGGGTTCCGCTTCCACCCGACGGACGAAGAGCTAGTCGTCCACTATCTCAAGAAAAAGGCCACCTCCGCTCCCCTCCCGGTTGCTATTATCGCTGAAGTCGACCTTTACAAGTTCGACCCCTGGGAGCTCCCAGGTATGCGTGAAATTATAATTCTTGTATTCAACATGTGTATAAAATTATTGCATACAACAAGTGTGTATAATATTATCGACAACAATAAACTGATTATATTATTTGTTTTCTTCTTTTTTCCTCTTTTCTTTATTTGTGCAGCTAAGGCTACGTTTGGAGAGCAAGAGTGGTATTTTTTCAGTCCTAGGGACCGGAAGTACCCGAACGGAGCGAGACCCAATAGGGCAGCGACTTCCGGGTATTGGAAAGCGACGGGGACTGATAAGCCGGTGCTGACTTCCGGCGATACTCAGAAAGTTGGTGTGAAAAAAGCACTTGTGTTCTATGGAGGAAAACCCCCAAAAGGAATTAAAACCAATTGGATTATGCACGAGTACAGGCTTGCTGATAACAAGCCCAACAACAAGCCACCTGGGTGTGACTTGGGCAACAAGAAGAACTCCATGAGGGTAATCCAACACTAAGCACGTGTATAATTAACTGATTAATTGATTAATGATATTTAAATTGGTTTTTTGTACCCCATGGTATCATTGGTACTTACCTTTTATTTGTTAATTTAATTTGGAGATTAGTAAATTGATTAATATGTTTGTGTTCATGTAGCTTGATGATTGGGTGCTGTGTAGAATTTACAAGAAGAACAACACGCATAGGCCGATGGATCATGAGAGGGAGGATTCCATGGAGGACATAATGGGACCATTGATGCCACCATCCATAAGTCATGTGGGCCACCATCAGAATATGAAGCTGCACTTTCCAAAATCTAATTCGAGTTATGGACCGCCTTTCATGGAAAATGACCAAATATTTTTTGATGGGATAATGAGCAGCACCGACGGATCAGCTTCTACTCATCAGCTGCAACTAAAACGGCCAATAGTTCCATCTTGGTACTGGAATAATCAGGAAGATGATCAGACGGCTGCTGATCCTTCATCAAGCAAGAGAATACAACTGCACCAATTGGACAATGGTACTAATTCTAATGGTGCTGGGATTAATGGTGGTTCTACAAATAACAATTCTAGTTCTATTGCCAATCTACTTTCCCAGCTTCCACAGACGCCACCATTGCACCAACATGCAGTTCTGGGGTCACTTGGCGACGGTATATTCCGGACGCCATATCAACTGCCTGGAATGAATTGGTATTCTGAGTCCAATTTGGGATAGAGGGTTGATGAATTTGATGATTTATGG
>Coxs_Orange
ATTAGAGAAATTTTTCAATATGACAGGAACACAGAGCATAACACCATATATCATTATATTATTAAAAGAACACTTAAAAAAACTTTTCTCCAATTAAATTATGACATACAATGTTCTGATTCGTATTCTAACACTTAAAAAAAACTTTTCTCCAATTAAATTATGACATACAATGTTCTGATTCATATTCCAGCCAAAAATCTCTCGTCCAATTCATCATGTAGTCTCTCCAATGGGTTGTTGGTGGGGTCCTTGGCAAAATTGGTGCTATTTTTGCGCAATAAAAGCATGACAACTTTTTTTTATCGCTTCTGTCAAAAAAAAAAGCATGACATCTGAAGCGTAATGCTTGTTCCCACCCCAGGCTTATCCGTCTGTATAATTTTGTTGCCTCGTGTGGTCCGTGGGCCCCACGGAACGTCCACCACACGTGTCGACCTTTCTCTCGTTTTCGAATTACACGTGTCGGCCTATCAACGGCCCACTTTTCAGTTCGCTTCGTCCTAGGGTTTTCCATCACCTCCATATCCCCTTTCCCTACCTGTCCCAATGCTAACCACCACACAGTCACTCTCAATCCCATGCACAAAATTAGGCCCCCGCCTTAATCATGGTTAACGAAGTAATTACACATCATATAAAATGGCTAATCTACCCTGATCCCATTACGTGGCCTTGACCATTGGTTCCCTAGTTTAAAAACCATGCAGGCAACTGCAGCGGAATATTTTCCCCTCACATACTTAAAACAGGGGCCCTGCCAGTCTGCCACCTCCAAACGACATTGAAGGTCTATATGTAATATGTGCTTGGCTGCACAGAAACCCTCCGAACCCAATAACCAAGGATGGAGTGCACCGACTCGTCCGCGGGCTCACAACAGCAACAGCACCAGCAGCCGCCACCTCCGCAGCCAAACCTGCCGCCCGGGTTCCGCTTCCACCCGACGGACGAAGAGCTAGTCGTCCACTATCTCAAGAAAAAGGCCACCTCCGCTCCCCTCCCGGTTGCTATCATCGCTGAAGTCGACCTTTACAAGTTCGACCCCTGGGAGCTCCCAGGTATGCGTGAAATTATAATTCTTGTATTCAACATGTGTATAAAATTATTGCATACAACAAGTGTGTATAATATTATCGACAACAATAAACTGATTATATTATTTGTTTTCTTCTTTTTTCCTCTTTTCTTTATTTGTTCAGCTAAGGCTACGTTTGGAGAGCAAGAGTGGTATTTTTTCAGTCCTAGGGACCGGAAGTACCCGAACGGAGCGAGACCCAATAGGGCAGCGACTTCCGGGTATTGGAAAGCGACGGGGACTGATAAGCCGGTGCTGACTTCCGGCGATACTCAGAAAGTTGGTGTGAAAAAAGCACTTGTGTTCTATGGAGGAAAACCCCCAAAAGGAATTAAAACCAATTGGATTATGCACGAGTACAGGCTTGCTGATAACAAGCCCAACAACAAGCCACCTGGGTGTGACTTGGGCAACAAGAAGAACTCCTTGAGGGTAATCCAACACTAAGCACGTGTATAATTAACTGATTAATTGATTAATGATATTTAAATTGGTTTTTTGTACCCCATGGTATCATTGGTACTTACCTTTTATTTGTTAATTTAATTTGAAGATTAGTAAATTGATTAATATGTTTGTGTTCATGTAGCTTGATGATTGGGTGCTGTGTAGAATTTACAAGAAGAACAACACGCATAGGCCGATGGATCATGAGAGGGAGGATTCCATGGAGGACATAATGGGACCATTGATGCCACCATCCATAAGTCATGTGGGCCACCATCAGAATATGAAGCTGCACTTTCCAAAATCTAATTCGAGTTATGGACCGCCTTTCATGGAAAATGACCAAATATTTTTTGATGGGATAATGAGCAGCACCGACGGATCAGCTTCTACTCATCAGCTGCAACTAAAACGGCCAATAGTTCCATCTTGGTACTGGAATAATCAGGAAGATGATCAGACGGCTGCTGATCCTTCATCAAGCAAGAGAATACAACTGCACCAATTGGACAATGGTACTAATTCTAATGGTGCTGGGATTAATGGTGGTTCTACAAATAACAATTCTAGTTCTATTGCCAATCTACTTTCCCAGCTTCCACAGACGCCACCATTGCACCAACATGCAGTTCTGGGGTCACTTGGCGACGGTATATTCCGGACGCCATATCAACTGCCTGGAATGAATTGGTATTCTGAGTCCAATTTGGGATAAAGGGTTGATGAATTTGATGATTTATGG
>Anna_1
ATTAGAGAAATTTTTCAATGTGACAGGAACACAGAGCATAACACCATATATCATTATATTATTAAAAGAACACTTAAAAAAACTTTTCTCCAATTAAATTATGACATACAATATTCTGATTCGTATTCTAACACTTAAAAAAAACTTTTCTCCAATTAAATTATGACATACAATGTTCTGATTCATATTCCAGCCAAAAATCTCTCGTCCAATTCATCATGTAGTCTCTCCAATGGGTTGTTGGTGGGGTCCTTGGCAAAATTGGTGCTATTTTGCGCAATAAAAGCATGACAACTTTTTTTTATCGCTTCTGTAAAAAAAAAAAGCATGACATCTGAAGCGTAATGCTTGTTCCCACCCCAGGCTTATCCGTCTGTATAATTTTGTTGCCTCGCGTGGTCCGTGGGCCCCACGGAAGTCCACCACACGTGTCGACCTTTCTCTCGTTTTCGAATTACACGTGTCGGCCTATCAACGGCCCACTTTTCAGTTCGCTTCGTCCTAGGGTTTTCCATCACCTCCATATCCCCTTTCCCTACCTGTCCCTATGCTAACCACCACACAGTCACTCTCAATCCCATGCACAAAATTAGGCCCCCGCCTTAATCATGGTTAACGAAGTAATTACACATCATATAAAATGGCTAATCTACCCTGATCCCATTACGTGGCCTTGACCATTGGTTCCCTAGTTTAAAAACCATGCAGGCAACTGCAGCGGAATATTGCCCCCTCACATACTTAAAACAGGGGCCCTGCCAGTCTGCCACCTCCAAACGACATTGAAGGTCTATATGTAATATGTGCTTGGCTGCACAGAAACCCTCCGAACCCAATAACCAAGGATGGAGTGCACCGACTCGTCCGCGGGCTCACAACAGCAACAGCACCAGCAGCCGCCACCTCCGCAGCCAAACCTGCCGCCCGGGTTCCGCTTCCACCCGACGGACGAAGAGCTAGTCGTCCACTATCTCAAGAAAAAGGCCACCTCCGCTCCCCTCCCGGTTGCTATTATCGCTGAAGTCGACCTTTACAAGTTCGACCCCTGGGAGCTCCCAGGTATGCGTGAAATTATAATTCTTGTATTCAACATGTGTATAAAATTATTGCATACAACAAGTGTGTATAATATTATCGACAACAATAAACTGATTATATTATTTGTTTTCTTCTTTTTTCCTCTTTTCTTTATTTGTGCAGCTAAGGCTACGTTTGGAGAGCAAGAGTGGTATTTTTTCAGTCCTAGGGACCGGAAGTACCCGAACGGAGCGAGACCCAATAGGGCAGCGACTTCCGGGTATTGGAAAGCGACGGGGACTGATAAGCCGGTGCTGACTTCCGGCGATACTCAGAAAGTTGGTGTGAAAAAAGCACTTGTGTTCTATGGAGGAAAACCCCCAAAAGGAATTAAAACCAATTGGATTATGCACGAGTACAGGCTTGCTGATAACAAGCCCAACAACAAGCCACCTGGGTGTGACTTGGGCAACAAGAAGAACTCCATGAGGGTAATCCAACACTAAGCACGTGTATAATTAACTGATTAATTGATTAATGATATTTAAATTGGTTTTTTGTACCCCATGGTATCATTGGTACTTACCTTTTATTTGTTAATTTAATTTGGAGATTAGTAAATTGATTAATATGTTTGTGTTCATGTAGCTTGATGATTGGGTGCTGTGTAGAATTTACAAGAAGAACAACACGCATAGGCCGATGGATCATGAGAGGGAGGATTCCATGGAGGACATAATGGGACCATTGATGTCACCATCCATAAGTCATGTGGGCCACCATCAGAATATGAAGCTGCACTTTCCAAAATCTAATTCGAGTTATGGACCGCCTTTCATGGAAAATGACCAAATATTTTTTGATGGGATAATGAGCAGCACCGACGGATCAGCTTCTACTCATCAGCTGCAACTAAAACGGCCAATAGTTCCATCTTGGTACTGGAATAATCAGGAAGATGATCAGACGGCTGCTGATCCTTCATCAAGCAAGAGAATACAACTGCACCAATTGGACAATGGTACTAATTCTAATGGTGATGGGATTAATGGTGGTTCTACAAATAACAATTCTTGTTCTATTGCCAATCTACTTTCCGAGCTTCCAGAGACTCCACCATTGCACCAACATGCAGTTCTGGGGTCACTTGGCGACGGTATATTTCAGACGCCATATCAACTGCCTGGAAAGAATTGGTATTCTGAGTCCAATTTGGGATAGAGGGTTGATGAATTTGATGATTTATGG
>Anna_2
ATTAGAGAAATTTTTCAATGTGACAAAAACACAGAGCATAACACCATATATCATTATATTATTAAAAAAACACTTAAAAAAAAAACTTTTCTCCAATTAAATTATGACATACAATGTTCTGATTCGTATTCTGGCCAAAAATCTCTCGTCCAATTCATCATGTAGTCTCTCCAATGGTTTTTTGGTGGGGTCCTTGGCAAAGTTGGTGGTATTTTTGCGCAATAAAAGCATGACAACTTTTTTTTTTATCGCTTCCGTCAAAAAAAACAGAAAAAAAGCATGACATCTGAAGCATAATGCTTGTTCCCACCCCAGGCTTATCCGTCTATATAATTTTGTTGCCTTGTGTGGTCCGTGGGCCCCACGGAGGTCCACTACACGTGTCGACCTTTCTCTCGTTTTCGAATTACAAGTGTCGGCCTATCAACGGCCCACTTTTCAGTTCGCTTCGTCTTAGGGTTTTCCATCACCGCCATATCCCCTTTCCCTACCTGTCCCTATGCTAACCACCACACAGTCACTCTCAATCCCATGCACAAAATTAGGCCCCCGCCTTAATCATGCTTAACGATGTAATTACACATCATATAAAATGGCTAATCTACCCTGATCCCATTACGGGGCCTTTACCATTGGTTCCCTAGTTTAAAAACCATGCAGGCAACTGCAGCGGAATATTGCCCTCACATGCTTAAAACAGGGGCCCTGCCAGTCTGCCACCTCCAAACGACATTGAAGGTCTATATGTAATATGTGCTTGGCTGCACAGAAACCCTCCGAACCCAATAACCAAAGATGGAGAGCACCTACTCGTCCGCGGGCTCACAACAGCAACAGCACCAGCAGCCGCAGCCGCAGCCGCCACCTCCGCAGCCAAACCTGCCGCCCGGGTTCCGCTTCCACCCTACGGACGAAGAGCTAGTCGTCCACTATCTCAAGAAAAAGGCCACCGCCGCTCCCCTCCCAGTTGCTATCATCGCTGAAGTCGACCTTTACAAGTTCGACCCCTGGGAGCTCCCAGGTATGCGTGAAATTATAATTCTTGTATTCAACATGTGTATAAAATTATTGCATACAACAAGTGTGTATAATATTATAAACAACAATAAACTGATTATATTATTTGTTTTCTTCTTTTTTTCTTTTTTTCTTTATTTGTGCAGCTAAGGCTACGTTTGGAGAGCAAGAGTGGTATTTTTTCAGTCCTAGGGACCGGAAGTACCCGAACGGAGCGAGACCCAATAGGGCAGCTACTTCCGGGTATTGGAAAGCGACGGGGACTGATAAGCCGGTGCTGACTTCCGGCGATACTCAGAAAGTTGGTGTGAAAAAAGCACTTGTGTTCTATGGAGGAAAACCCCCAAAAGGAATGAAAACCAATTGGATTATGCACGAGTACAGGCTTGCTGATAACAAGCCCAACAAGAAGCCACCTGGGTGTGACTTGGGCAACAAGAACTCCTTGAGGGTAATCCAACACGAAGCACGTGTATAATTAACTGATTAATTGATTAATGATATTTAAATTGGTATTTTGTACCCCGTGGTATAATTGGTACTTGCCTTTTATATGTTAATTTAATTTGAAGATTAGTAAATTGATTAATATGTTTGTGTTCATGTAGCTTGATGATTGGGTGCTGTGTAGAATTTACAAGAAGAACAACACGCATAGGCCGATGGATCATGAGAGGGAGGATTCCATGGAGGACATAATGGGACCATTGATGCCACCATCCATAAGTCATGTGGGCCACCATCAGAATATGAAGCTGCACTTTCCAAAATCTAATTCGAGTTATGGACCGCCTTTCATGGAAAATGACCAAATATTTTTTGATGGGATAATGAGCAGCACCGACGGATCAGCTTCTACTCATCAGCTGCAACTAAAACGGCCAATAGTTCCATCTTGGTACTGGAATAATCAGGAAGATGATCAGACGGCTGCTGTTCCTTCATCAAGCAAGAGAATACAACTGCACCAATTGGACAATGGTACTAATTCTAATGGTGATGGGATTAATGGTGGTTCTACAAATAACAATTCTTGTTCTATTGCCAATCTACTTTCCGAGCTTCCAGAGACTCCACCATTGCACCAACATGCAGTTCTGGGGTCACTTGGCGACGGTATATTTCAGACGCCATATCAACTGCCTGGAAAGAATTGGTATTCTGAGTCCAATTTGGGATAGAGGGTTGATGAATTTGATGATTTATGG
>Deacon_Jones
ATTAGAGAAATTTTTCAATATGACAGGAACACAGAGCATAACACTATATATTATTATATTATTAAAAGAACACTTAAAAAAACTTTTCTCCAATTAAATTATGACATACAATGTTCTGATTCGTATTCTAACACTTAAAAAAAACTTTTCTCCAATTAAATTATGACATACAATGTTCTGATTCATATTCCAGCCAAAAATATCTCGTCCAATTCATCATGTAGTCTCTCCAATGGGTTGTTGGTGGGGTCCTTGGCAAAATTGGTGCTATTTTTGCGCAATAAAAGCATGACAACTTTTTTTTATCGCTTCTGTCAAAAAAAAAAGCATGACATCTGAAGCGTAATGCTTGTTCCCACCCCAGGCTTATCCGTCTGTATAATTTTGTTGCCTCGTGTGGTCCGTGGGCCCCACGGAACGTCCACCACACGTGTCGACCTTTCTCTCGTTTTCGAATTACACGTGTCGGCCTATCAACGGCCCACTTTTCAGTTCGCTTCGTCCTAGGGTTTTCCATCACCTCCATATCCCCTTTCCCTACCTGTCCCAATGCTAACCACCACACAGTCACTCTCAATCCCATGCACAAAATTAGGCCCCCGCCTTAATCATGGTTAACGAAGTAATTACACATCATATAAAATGGCTAATCTACCCTGATCCCATTACGTGGCCTTGACCATTGGTTCCCTAGTTTAAAAACCATGCAGGCAACTGCAGCGGAATATTTTCCCCTCACATACTTAAAACAGGGGCCCTGCCAGTCTGCCACCTCCAAACGACATTGAAGGTCTATATGTAATATGTGCTTGGCTGCACAGAAACCCTCCGAACCCAATAACCAAGGATGGAGTGCACCGACTCGTCCGCGGGCTCACAACAGCAACAGCACCAGCAGCCGCCACCTCCGCAGCCAAACCTGCCGCCCGGGTTCCGCTTCCACCCGACGGACGAAGAGCTAGTCGTCCACTATCTCAAGAAAAAGGCCACCTCCGCTCCCCTCCCGGTTGCTATCATCGCTGAAGTCGACCTTTACAAGTTCGACCCCTGGGAGCTCCCAGGTATGCGTGAAATTATAATTCTTGTATTCAACATGTGTATAAAATTATTGCATACAACAAGTGTGTATAATATTATCGACAACAATAAACTGATTATATTATTTGTTTTCTTCTTTTTTCCTCTTTTCTTTATTTGTTCAGCTAAGGCTACGTTTGGAGAGCAAGAGTGGTATTTTTTCAGTCCTAGGGACCGGAAGTACCCGAACGGAGCGAGACCCAATAGGGCAGCGACTTCCGGGTATTGGAAAGCGACGGGGACTGATAAGCCGGTGCTGACTTCCGGCGATACTCAGAAAGTTGGTGTGAAAAAAGCACTTGTGTTCTATGGAGGAAAACCCCCAAAAGGAATTAAAACCAATTGGATTATGCACGAGTACAGGCTTGCTGATAACAAGCCCAACAACAAGCCACCTGGGTGTGACTTGGGCAACAAGAAGAACTCCTTGAGGGTAATCCAACACTAAGCACGTGTATAATTAACTGATTAATTGATTAATGATATTTAAATTGGTTTTTTGTACCCCATGGTATCATTGGTACTTACCTTTTATTTGTTAATTTAATTTGAAGATTAGTAAATTGATTAATATGTTTGTGTTCATGTAGCTTGATGATTGGGTGCTGTGTAGAATTTACAAGAAGAACAACACGCATAGGCCGATGGATCATGAGAGGGAGGATTCCATGGAGGACATAATGGGACCATTGATGCCACCATCCATAAGTCATGTGGGCCACCATCAGAATATGAAGCTGCACTTTCCAAAATCTAATTCGAGTTATGGACCGCCTTTCATGGAAAATGACCAAATATTTTTTGATGGGATAATGAGCAGCACCGACGGATCAGCTTCTACTCATCAGCTGCAACTAAAACGGCCAATAGTTCCATCTTGGTACTGGAATAATCAGGAAGATGATCAGACGGCTGCTGATCCTTCATCAAGCAAGAGAATACAACTGCACCAATTGGACAATGGTACTAATTCTAATGGTGCTGGGATTAATGGTGGTTCTACAAATAACAATTCTAGTTCTATTGCCAATCTACTTTCCCAGCTTCCACAGACGCCACCATTGCACCAACATGCAGTTCTGGGGTCACTTGGCGACGGTATATTCCGGACGCCATATCAACTGCCTGGAATGAATTGGTATTCTGAGTCCAATTTGGGATAAAGGGTTGATGAATTTGATGATTTATGG
>Early_Harvest
ATTAGAGAAATTTTTCAATGTGACAAAAACACAGAGCATAACACCATATATCATTATATTATTAAAAAAACACTTAAAAAAAAAAACTTTTCTCCAATTAAATTATGACATACAATGTTCTGATTCGTATTCTGGCCAAAAATCTCTCGTCCAATTCATCATGTAGTCTCTCCAATGGTTTTTTGGTGGGGTCCTTGGCAAAGTTGGTGGTATTTTTGCGCAATAAAAGCATGACAACTTTTTTTTTTATCGCTTCCGTCAAAAAAAACAGAAAAAAAGCATGACATCTGAAGCATAATGCTTGTTCCCACCCCAGGCTTATCCGTCTATATAATTTTGTTGCCTTGTGTGGTCCGTGGGCCCCACGGAGGTCCACTACACGTGTCGACCTTTCTCTCGTTTTCGAATTACAAGTGTCGGCCTATCAACGGCCCACTTTTCAGTTCGCTTCGTCCTAGGGTTTTCCATCACCGCCATATCCCCTTTCCCTACCTGTCCCTATGCTAACCACCACACAGTCACTCTCAATCCCATGCACAAAATTAGGCCCCCGCCTTAATCATGCTTAACGATGTAATTACACATCATATAAAATGGCTAATCTACCCTGATCCCATTACGGGGCCTTTACCATTGGTTCCCTAGTTTAAAAACCATGCAGGCAACTGCAGCGGAATATTGCCCTCACATGCTTAAAACAGGGGCCCTGCCAGTCTGCCACCTCCAAACGACATTGAAGGTCTATATGTAATATGTGCTTGGCTGCACAGAAACCCTCCGAACCCAATAACCAAAGATGGAGAGCACCTACTCGTCCGCGGGCTCACAACAGCAACAGCACCAGCAGCCGCAGCCGCAGCCGCCACCTCCGCAGCCAAACCTGCCGCCCGGGTTCCGCTTCCACCCTACGGACGAAGAGCTAGTCGTCCACTATCTCAAGAAAAAGGCCACCGCCGCTCCCCTCCCGGTTGCTATCATCGCTGAAGTCGACCTTTACAAGTTCGACCCCTGGGAGCTCCCAGGTATGCGTGAAATTATAATTCTTGTATTCAACATGTGTATAAAATTATTGCATACAACAAGTGTGTATAATATTATAAACAACAATAAACTGATTATATTATTTGTTTTCTTCTTTTTTTCTTTTTTTCTTTATTTGTGCAGCTAAGGCTACGTTTGGAGAGCAAGAGTGGTATTTTTTCAGTCCTAGGGACCGGAAGTACCCGAACGGAGCGAGACCCAATAGGGCAGCTACTTCCGGGTATTGGAAAGCGACGGGGACTGATAAGCCGGTGCTGACTTCCGGCGATACTCAGAAAGTTGGTGTGAAAAAAGCACTTGTGTTCTATGGAGGAAAACCCCCAAAAGGAATGAAAACCAATTGGATTATGCACGAGTACAGGCTTGCTGATAACAAGCCCAACAAGAAGCCACCTGGGTGTGACTTGGGCAACAAGAACTCCTTGAGGGTAATCCAACACGAAGCACGTGTATAATTAACTGATTAATTGATTAATGATATTTAAATTGGTATTTTGTACCCCGTGGTATAATTGGTACTTGCCTTTTATATGTTAATTTAATTTGAAGATTAGTAAATTGATTAATATGTTTGTGTTCATGTAGCTTGATGATTGGGTGCTGTGTAGAATTTACAAGAAGAACAACACGCATAGGCCGATGGATCATGAGAGGGAGGATTCCATGGAGGACATAATGGGACCATTGATGCCACCATCCATAAGTCATGTGGGCCACCATCAGAATATGAAGCTGCACTTTCCAAAATCTAATTCGAGTTATGGACCGCCTTTCATGGAAAATGACCAAATATTTTTTGATGGGATAATGAGCAGCACCGACGGATCAGCTTCTACTCATCAGCTGCAACTAAAACGGCCAATAGTTCCATCTTGGTACTGGAATAATCAGGAAGATGATCAGACGGCTGCTGTTCCTTCATCAAGCAAGAGAATACAACTGCACCAATTGGACAATGGTACTAATTCTAATGGTGATGGGATTAATGGTGGTTCTACAAATAACAATTCTTGTTCTATTGCCAATCTACTTTCCGAGCTTCCAGAGACTCCACCATTGCACCAACATGCAGTTCTGGGGTCACTTGGCGACGGTATATTTCAGACGCCATATCAACTGCCTGGAAAGAATTGGTATTCTGAGTCCAATTTGGGATAGAGTGTTGATGAATTTGATGATTTATGG
>Collins_June
ATTAGAGAAATTTTTCAATGTGACAAAAACACAGAGCATAACACCATATATCATTATATTATTAAAAAAACACTTAAAAAAAAAAACTTTTCTCCAATTAAATTATGACATACAATGTTCTGATTCGTATTCTGGCCAAAAATCTCTCGTCCAATTCATCATGTAGTCTCTCCAATGGTTTTTTGGTGGGGTCCTTGGCAAAGTTGGTGGTATTTTTGCGCAATAAAAGCATGACAACTTTTTTTTTTATCGCTTCCGTCAAAAAAAACAGAAAAAAAGCATGACATCTGAAGCATAATGCTTGTTCCCACCCCAGGCTTATCCGTCTATATAATTTTGTTGCCTTGTGTGGTCCGTGGGCCCCACGGAGGTCCACTACACGTGTCGACCTTTCTCTCGTTTTCGAATTACAAGTGTCGGCCTATCAACGGCCCACTTTTCAGTTCGCTTCGTCCTAGGGTTTTCCATCACCGCCATATCCCCTTTCCCTACCTGTCCCTATGCTAACCACCACACAGTCACTCTCAATCCCATGCACAAAATTAGGCCCCCGCCTTAATCATGCTTAACGATGTAATTACACATCATATAAAATGGCTAATCTACCCTGATCCCATTACGGGGCCTTTACCATTGGTTCCCTAGTTTAAAAACCATGCAGGCAACTGCAGCGGAATATTGCCCTCACATGCTTAAAACAGGGGCCCTGCCAGTCTGCCACCTCCAAACGACATTGAAGGTCTATATGTAATATGTGCTTGGCTGCACAGAAACCCTCCGAACCCAATAACCAAAGATGGAGAGCACCTACTCGTCCGCGGGCTCACAACAGCAACAGCACCAGCAGCCGCAGCCGCAGCCGCCACCTCCGCAGCCAAACCTGCCGCCCGGGTTCCGCTTCCACCCTACGGACGAAGAGCTAGTCGTCCACTATCTCAAGAAAAAGGCCACCGCCGCTCCCCTCCCGGTTGCTATCATCGCTGAAGTCGACCTTTACAAGTTCGACCCCTGGGAGCTCCCAGGTATGCGTGAAATTATAATTCTTGTATTCAACATGTGTATAAAATTATTGCATACAACAAGTGTGTATAATATTATAAACAACAATAAACTGATTATATTATTTGTTTTCTTCTTTTTTTCTTTTTTTCTTTATTTGTGCAGCTAAGGCTACGTTTGGAGAGCAAGAGTGGTATTTTTTCAGTCCTAGGGACCGGAAGTACCCGAACGGAGCGAGACCCAATAGGGCAGCTACTTCCGGGTATTGGAAAGCGACGGGGACTGATAAGCCGGTGCTGACTTCCGGCGATACTCAGAAAGTTGGTGTGAAAAAAGCACTTGTGTTCTATGGAGGAAAACCCCCAAAAGGAATGAAAACCAATTGGATTATGCACGAGTACAGGCTTGCTGATAACAAGCCCAACAAGAAGCCACCTGGGTGTGACTTGGGCAACAAGAACTCCTTGAGGGTAATCCAACACGAAGCACGTGTATAATTAACTGATTAATTGATTAATGATATTTAAATTGGTATTTTGTACCCCGTGGTATAATTGGTACTTGCCTTTTATATGTTAATTTAATTTGAAGATTAGTAAATTGATTAATATGTTTGTGTTCATGTAGCTTGATGATTGGGTGCTGTGTAGAATTTACAAGAAGAACAACACGCATAGGCCGATGGATCATGAGAGGGAGGATTCCATGGAGGACATAATGGGACCATTGATGCCACCATCCATAAGTCATGTGGGCCACCATCAGAATATGAAGCTGCACTTTCCAAAATCTAATTCGAGTTATGGACCGCCTTTCATGGAAAATGACCAAATATTTTTTGATGGGATAATGAGCAGCACCGACGGATCAGCTTCTACTCATCAGCTGCAACTAAAACGGCCAATAGTTCCATCTTGGTACTGGAATAATCAGGAAGATGATCAGACGGCTGCTGTTCCTTCATCAAGCAAGAGAATACAACTGCACCAATTGGACAATGGTACTAATTCTAATGGTGATGGGATTAATGGTGGTTCTACAAATAACAATTCTTGTTCTATTGCCAATCTACTTTCCGAGCTTCCAGAGACTCCACCATTGCACCAACATGCAGTTCTGGGGTCACTTGGCGACGGTATATTTCAGACGCCATATCAACTGCCTGGAAAGAATTGGTATTCTGAGTCCAATTTGGGATAGAGGGTTGATGAATTTGATGATTTATGG
>Directeur_Lesage_1
ATTAGAGAAATTTTTCAATATGACAGGAACACAGAGCATAACACCATATATCATTATATTATTAAAAGAACACTTAAAAAAACTTTTCTCCAATTAAATTATGACATACAATGTTCTGATTTGTATTCTAACACTTCAAAAAAACTTTTCTCCAATTAAATTATGACATACAATGTTCTGATTCATATTCCAGCCAAAAATCTCTCGTCCAATTCATCATGTAGTCTCTCCAATGGGTTGTTGGTGGGGTCCTTGGCAAAATTGGTGCTATTTTTGCGCAATAAAAGCATGACAACTTTTTTTTATCGCTTCTGTCAAAAAAAAAAGCATGACATCTGAAGCGTAATGCTTGTTCCCACCCCAGGCTTATCCGTCTGTATAATTTTGTTGCCTCGTGTGGTCCGTGGGCTCCACGGAACGTCCACCACACGTGTCGACCTTTCTCTCGTTTTCGAATTACACGTGTCGGCCTATCAACGGCCCACTTTTCAGTTCGCTTCGTCCTAGGGTTTTCCATCACCTCCATATCCCCTTTCCCTACCTGTCCCTATGCTAACCACCACACAGTCACTCTCAATCCCATGCACAAAATTAGGCCCTCGCCTTAATCATGGTTAACGAAGTAATTACACATCATATAAAATGGCTAATCTACCCTGATCCCATTACGTGGCCTTGACCATTGGTTCCCTAGTTTAAAAACCATGCAGGCAACTGCAGCGGAATATTGCCCCCTCACATACTTAAAACAGGGGCCCTGCCAGTCTGCCACCTCCAAACGACATTGAAGGTCTATATGTAATATGTGCTTGGCTGCACAGAAACCCTCCGAACCCAATAACCAAGGATGGAGTGCACCGACTCGTCCGCGGGCTCACAACAGCAACAGCACCAGCAGCCGCCACCTCCGCAGCCAAACCTGCCGCCCGGGTTCCGCTTCCACCCGACGGACGAAGAGCTAGTCGTCCACTATCTCAAGAAAAAGGCCACCTCCGCTCCCCTCCCGGTTGCTATCATCGCTGAAGTCGACCTTTACAAGTTCGACCCCTGGGAGCTCCCAGGTATGCGTGAAATTATAATTCTTGTATTCAACATGTGTATAAAATTATTGCATACAACAAGTGTGTATAATATTATCGACAACAATAAACTGATTATATTATTTGTTTTCTTCTTTTTTCCTCTTTTCTTTATTTGTGCAGCTAAGGCTACGTTTGGAGAGCAAGAGTGGTATTTTTTCAGTCCTAGGGACCGGAAGTACCCGAACGGAGCGAGACCCAATAGGGCAGCGACTTCCGGGTATTGGAAAGCGACGGGGACTGATAAGCCGGTGCTGACTTCCGGCGATACTCAGAAAGTTGGTGTGAAAAAAGCACTTGTGTTCTATGGAGGAAAACCCCCAAAAGGAATTAAAACCAATTGGATTATGCACGAGTACAGGCTTGCTGATAACAAGCCCAACAACAAGCCACCTGGGTGTGACTTGGGCAACAAGAAGAACTCCTTGAGGGTAATCCAACACTAAGCACGTGTATAATTAACTGATTAATTGATTAATGATATTTAAATTGGTATTTTGTACCCCATGGTATCATTGGTACTTACCTTTTATTTGTTAATTTAATTTGAAGATTAGTAAATTGATTAATATGTTTGTGTTCATGTAGCTTGATGATTGGGTGCTGTGTAGAATTTACAAGAAGAACAACACGCATAGGCCGATGGATCATGAGAGGGAGGATTCCATGGAGGACATAATGGGACCATTGATGCCACCATCCATAAGTCATGTGGGCCACCATCAGAATATGAAGCTGCACTTTCCAAAATCTAATTCGAGTTATGGACCGCCTATCATGGAAAATGACCAAATATTTTTTGATGGGATAATGAGCAGCACCGACGGATCAGCTTCTACTCATCAGCTGCAACTAAAACGGCCAATAGTTCCATCTTGGTACTGGAATAATCAGGAAGATGATCAGACGGCTGCTGATCCTTCATCAAGCAAGAGAATACAACTGCACCAATTGGACAATGGTACTAATTCTAATGGTGCTGGGATTAATGGTGGTTCTACAAATAACAATTCTAGTTCTATTGCCAATCTACTTTCCCAGCTTCCACAGACGCCACCATTGCACCAACATGCAGTTCTGGGGTCACTTGGCGACGGTATATTCCGGACGCCATATCAACTGCCTGGAATGAATTGGTATTCTGAGTCCAATTTGGGATAGAGGGTTGATGAATTTGATGATTTATGG
>Directeur_Lesage_2
ATTAGAGAAATTTTTCAATGTGACAAAAACACAGAGCATAACACCATATATCATTATATTATTAAAAAAACACTTAAAAAAAAAAACTTTTCTCCAATTAAATTATGACATACAATGTTCTGATTCGTATTCTGGCCAAAAATCTCTCGTCCAATTCATCATGTAGTCTCTCCAATGGTTTTTTGGTGGGGTCCTTGGCAAAGTTGGTGGTATTTTTGCGCAATAAAAGCATGACAACTTTTTTTTTTATCGCTTCCGTCAAAAAAAACAGAAAAAAAGCATGACATCTGAAGCATAATGCTTGTTCCCACCCCAGGCTTATCCGTCTATATAATTTTGTTGCCTTGTGTGGTCCGTGGGCCCCACGGAGGTCCACTACACGTGTCGACCTTTCTCTCGTTTTCGAATTACAAGTGTCGGCCTATCAACGGCCCACTTTTCAGTTCGCTTCGTCCTAGGGTTTTCCATCACCGCCATATCCCCTTTCCCTACCTGTCCCTATGCTAACCACCACACAGTCACTCTCAATCCCATGCACAAAATTAGGCCCCCGCCTTAATCATGCTTAACGATGTAATTACACATCATATAAAATGGCTAATCTACCCTGATCCCATTACGGGGCCTTTACCATTGGTTCCCTAGTTTAAAAACCATGCAGGCAACTGCAGCGGAATATTGCCCTCACATGCTTAAAACAGGGGCCCTGCCAGTCTGCCACCTCCAAACGACATTGAAGGTCTATATGTAATATGTGCTTGGCTGCACAGAAACCCTCCGAACCCAATAACCAAAGATGGAGAGCACCTACTCGTCCGCGGGCTCACAACAGCAACAGCACCAGCAGCCGCAGCCGCAGCCGCCACCTCCGCAGCCAAACCTGCCGCCCGGGTTCCGCTTCCACCCTACGGACGAAGAGCTAGTCGTCCACTATCTCAAGAAAAAGGCCACCGCCGCTCCCCTCCCGGTTGCTATCATCGCTGAAGTCGACCTTTACAAGTTCGACCCCTGGGAGCTCCCAGGTATGCGTGAAATTATAATTCTTGTATTCAACATGTGTATAAAATTATTGCATACAACAAGTGTGTATAATATTATAAACAACAATAAACTGATTATATTATTTGTTTTCTTCTTTTTTTCTTTTTTTCTTTATTTGTGCAGCTAAGGCTACGTTTGGAGAGCAAGAGTGGTATTTTTTCAGTCCTAGGGACCGGAAGTACCCGAACGGAGCGAGACCCAATAGGGCAGCTACTTCCGGGTATTGGAAAGCGACGGGGACTGATAAGCCGGTGCTGACTTCCGGCGATACTCAGAAAGTTGGTGTGAAAAAAGCACTTGTGTTCTATGGAGGAAAACCCCCAAAAGGAATGAAAACCAATTGGATTATGCACGAGTACAGGCTTGCTGATAACAAGCCCAACAAGAAGCCACCTGGGTGTGACTTGGGCAACAAGAACTCCTTGAGGGTAATCCAACACGAAGCACGTGTATAATTAACTGATTAATTGATTAATGATATTTAAATTGGTATTTTGTACCCCGTGGTATAATTGGTACTTGCCTTTTATATGTTAATTTAATTTGAAGATTAGTAAATTGATTAATATGTTTGTGTTCATGTAGCTTGATGATTGGGTGCTGTGTAGAATTTACAAGAAGAACAACACGCATAGGCCGATGGATCATGAGAGGGAGGATTCCATGGAGGACATAATGGGACCATTGATGCCACCATCCATAAGTCATGTGGGCCACCATCAGAATATGAAGCTGCACTTTCCAAAATCTAATTCGAGTTATGGACCGCCTTTCATGGAAAATGACCAAATATTTTTTGATGGGATAATGAGCAGCACCGACGGATCAGCTTCTACTCATCAGCTGCAACTAAAACGGCCAATAGTTCCATCTTGGTACTGGAATAATCAGGAAGATGATCAGACGGCTGCTGTTCCTTCATCAAGCAAGAGAATACAACTGCACCAATTGGACAATGGTACTAATTCTAATGGTGATGGGATTAATGGTGGTTCTACAAATAACAATTCTAGTTCTATTGCCAATCTACTTTCCCAGCTTCCACAGACGCCACCATTGCACCAACATGCAGTTCTGGGGTCACTTGGCGACGGTATATTCCGGACGCCATATCAACTGCCTGGAATGAATTGGTATTCTGAGTCCAATTTGGGATAGAGGGTTGATGAATTTGATGATTTATGG
>Beacon
ATTAGAGAAATTTTTCAATGTGACAAAAACACAGAGCATAACACCATATATCATTATATTATTAAAAAAACACTTAAAAAAAAAAACTTTTCTCCAATTAAATTATGACATACAATGTTCTGATTCGTATTCTGGCCAAAAATCTCTCGTCCAATTCATCATGTAGTCTCTCCAATGGTTTTTTGGTGGGGTCCTTGGCAAAGTTGGTGGTATTTTTGCGCAATAAAAGCATGACAACTTTTTTTTTATCGCTTCCGTCAAAAAAAACAGAAAAAAAGCATGACATCTGAAGCATAATGCTTGTTCCCACCCCAGGCTTATCCGTCTATATAATTTTGTTGCCTTGTGTGGTCCGTGGGCCCCACGGAGGTCCACTACACGTGTCGACCTTTCTCTCGTTTTCGAATTACAAGTGTCGGCCTATCAACGGCCCACTTTTCAGTTCGCTTCGTCCTAGGGTTTTCCATCACCGCCATATCCCCTTTCCCTACCTGTCCCTATGCTAACCACCACACAGTCACTCTCAATCCCATGCACAAAATTAGGCCCCCGCCTTAATCATGCTTAACGATGTAATTACACATCATATAAAATGGCTAATCTACCCTGATCCCATTACGGGGCCTTTACCATTGGTTCCCTAGTTTAAAAACCATGCAGGCAACTGCAGCGGAATATTGCCCTCACATGCTTAAAACAGGGGCCCTGCCAGTCTGCCACCTCCAAACGACATTGAAGGTCTATATGTAATATGTGCTTGGCTGCACAGAAACCCTCCGAACCCAATAACCAAAGATGGAGAGCACCTACTCGTCCGCGGGCTCACAACAGCAACAGCACCAGCAGCCGCAGCCGCAGCCGCCACCTCCGCAGCCAAACCTGCCGCCCGGGTTCCGCTTCCACCCTACGGACGAAGAGCTAGTCGTCCACTATCTCAAGAAAAAGGCCACCGCCGCTCCCCTCCCGGTTGCTATCATCGCTGAAGTCGACCTTTACAAGTTCGACCCCTGGGAGCTCCCAGGTATGCGTGAAATTATAATTCTTGTATTCAACATGTGTATAAAATTATTGCATACAACAAGTGTGTATAATATTATAAACAACAATAAACTGATTATATTATTTGTTTTCTTCTTTTTTTCTTTTTTTCTTTATTTGTGCAGCTAAGGCTACGTTTGGAGAGCAAGAGTGGTATTTTTTCAGTCCTAGGGACCGGAAGTACCCGAACGGAGCGAGACCCAATAGGGCAGCTACTTCCGGGTATTGGAAAGCGACGGGGACTGATAAGCCGGTGCTGACTTCCGGCGATACTCAGAAAGTTGGTGTGAAAAAAGCACTTGTGTTCTATGGAGGAAAACCCCCAAAAGGAATGAAAACCAATTGGATTATGCACGAGTACAGGCTTGCTGATAACAAGCCCAACAAGAAGCCACCTGGGTGTGACTTGGGCAACAAGAACTCCTTGAGGGTAATCCAACACGAAGCACGTGTATAATTAACTGATTAATTGATTAATGATATTTAAATTGGTATTTTGTACCCCGTGGTATAATTGGTACTTGCCTTTTATATGTTAATTTAATTTGAAGATTAGTAAATTGATTAATATGTTTGTGTTCATGTAGCTTGATGATTGGGTGCTGTGTAGAATTTACAAGAAGAACAACACGCATAGGCCGATGGATCATGAGAGGGAGGATTCCATGGAGGACATAATGGGACCATTGATGCCACCATCCATAAGTCATGTGGGCCACCATCAGAATATGAAGCTGCACTTTCCAAAATCTAATTCGAGTTATGGACCGCCTTTCATGGAAAATGACCAAATATTTTTTGATGGGATAATGAGCAGCACCGACGGATCAGCTTCTACTCATCAGCTGCAACTAAAACGGCCAATAGTTCCATCTTGGTACTGGAATAATCAGGAAGATGATCAGACGGCTGCTGTTCCTTCATCAAGCAAGAGAATACAACTGCACCAATTGGACAATGGTACTAATTCTAATGGTGATGGGATTAATGGTGGTTCTACAAATAACAATTCTTGTTCTATTGCCAATCTACTTTCCGAGCTTCCAGAGACTCCACCATTGCACCAACATGCAGTTCTGGGGTCACTTGGCGACGGTATATTTCAGACGCCATATCAACTGCCTGGAAAGAATTGGTATTCTGAGTCCAATTTGGGATAGAGGGTTGATGAATTTGATGATTTATGG
>Blairmont_1
ATTAGAGAAATTTTTCAATGTGACAGGAACACAGAGCATAACACCATATATCATTATATTATTAAAAGAACACTTAAAAAAACTTTTCTCCAATTAAATTATGACATACAATATTCTGATTCGTATTCTAACACTTAAAAAAAACTTTTCTCCAATTAAATTATGACATACAATGTTCTGATTCATATTCCAGCCAAAAATCTCTCGTCCAATTCATCATGTAGTCTCTCCAATGGGTTGTTGGTGGGGTCCTTGGCAAAATTGGTGCTATTTTTGCGCAATAAAAGCATGACAACTTTTTTTTATCGCTTCTGTAAAAAAAAAAAGCATGACATCTGAAGCGTAATGCTTGTTCCCACCCCAGGCTTATCCGTCTGTATAATTTTGTTGCCTCGCGTGGTCCGTGGGCCCCACGGAAGTCCACCACACGTGTCGACCTTTCTCTCGTTTTCGAATTACACGTGTCGGCCTATCAACGGCCCACTTTTCAGTTCGCTTCGTCCTAGGGTTTTCCATCACCTCCATATCCCCTTTCCCTACCTGTCCCTATGCTAACCACCACACAGTCACTCTCAATCCCATGCACAAAATTAGGCCCCCGCCTTAATCATGGTTAACGAAGTAATTACACATCATATAAAATGGCTAATCTACCCTGATCCCATTACGTGGCCTTGACCATTGGTTCCCTAGTTTAAAAACCATGCAGGCAACTGCAGCGGAATATTGCCCCCTCACATACTTAAAACAGGGGCCCTGCCAGTCTGCCACCTCCAAACGACATTGAAGGTCTATATGTAATATGTGCTTGGCTGCACAGAAACCCTCCGAACCCAATAACCAAGGATGGAGTGCACCGACTCGTCCGCGGGCTCACAACAGCAACAGCACCAGCAGCCGCCACCTCCGCAGCCAAACCTGCCGCCCGGGTTCCGCTTCCACCCGACGGACGAAGAGCTAGTCGTCCACTATCTCAAGAAAAAGGCCACCTCCGCTCCCCTCCCGGTTGCTATTATCGCTGAAGTCGACCTTTACAAGTTCGACCCCTGGGAGCTCCCAGGTATGCGTGAAATTATAATTCTTGTATTCAACATGTGTATAAAATTATTGCATACAACAAGTGTGTATAATATTATCGACAACAATAAACTGATTATATTATTTGTTTTCTTCTTTTTTCCTCTTTTCTTTATTTGTGCAGCTAAGGCTACGTTTGGAGAGCAAGAGTGGTATTTTTTCAGTCCTAGGGACCGGAAGTACCCGAACGGAGCGAGACCCAATAGGGCAGCGACTTCCGGGTATTGGAAAGCGACGGGGACTGATAAGCCGGTGCTGACTTCCGGCGATACTCAGAAAGTTGGTGTGAAAAAAGCACTTGTGTTCTATGGAGGAAAACCCCCAAAAGGAATTAAAACCAATTGGATTATGCACGAGTACAGGCTTGCTGATAACAAGCCCAACAACAAGCCACCTGGGTGTGACTTGGGCAACAAGAAGAACTCCATGAGGGTAATCCAACACTAAGCACGTGTATAATTAACTGATTAATTGATTAATGATATTTAAATTGGTTTTTTGTACCCCATGGTATCATTGGTACTTACCTTTTATTTGTTAATTTAATTTGGAGATTAGTAAATTGATTAATATGTTTGTGTTCATGTAGCTTGATGATTGGGTGCTGTGTAGAATTTACAAGAAGAACAACACGCATAGGCCGATGGATCATGAGAGGGAGGATTCCATGGAGGACATAATGGGACCATTGATGCCACCATCCATAAGTCATGTGGGCCACCATCAGAATATGAAGCTGCACTTTCCAAAATCTAATTCGAGTTATGGACCGCCTTTCATGGAAAATGACCAAATATTTTTTGATGGGATAATGAGCAGCACCGACGGATCAGCTTCTACTCATCAGCTGCAACTAAAACGGCCAATAGTTCCATCTTGGTACTGGAATAATCAGGAAGATGATCAGACGGCTGCTGATCCTTCATCAAGCAAGAGAATACAACTGCACCAATTGGACAATGGTACTAATTCTAATGGTGCTGGGATTAATGGTGGTTCTACAAATAACAATTCTAGTTCTATTGCCAATCTACTTTCCCAGCTTCCACAGACGCCACCATTGCACCAACATGCAGTTCTGGGGTCACTTGGCGACGGTATATTCCGGACGCCATATCAACTGCCTGGAATGAATTGGTATTCTGAGTCCAATTTGGGATAGAGGGTTGATGAATTTGATGATTTATGG
>Blairmont_2
ATTAGAGAAATTTTTCAATGTGACAAAAACACAGAGCATAACACCATATATCATTATATTATTAAAAAAACACTTAAAAAAAAAACTTTTCTCCAATTAAATTATGACATACAATGTTCTGATTCGTATTCTGGCCAAAAATCTCTCGTCCAATTCATCATGTAGTCTCTCCAATGGTTTTTTGGTGGGGTCCTTGGCAAAGTTGGTGGTATTTTTGCGCAATAAAAGCATGACAACTTTTTTTTTTATCGCTTCCGTCAAAAAAAACAGAAAAAAAGCATGACATCTGAAGCATAATGCTTGTTCCCACCCCAGGCTTATCCGTCTATATAATTTTGTTGCCTTGTGTGGTCCGTGGGCCCCACGGAGGTCCACTACACGTGTCGACCTTTCTCTCGTTTTCGAATTACAAGTGTCGGCCTATCAACGGCCCACTTTTCAGTTCGCTTCGTCCTAGGGTTTTCCATCACCGCCATATCCCCTTTCCCTACCTGTCCCTATGCTAACCACCACACAGTCACTCTCAATCCCATGCACAAAATTAGGCCCCCGCCTTAATCATGCTTAACGATGTAATTACACATCATATAAAATGGCTAATCTACCCTGATCCCATTACGGGGCCTTTACCATTGGTTCCCTAGTTTAAAAACCATGCAGGCAACTGCAGCGGAATATTGCCCTCACATGCTTAAAACAGGGGCCCTGCCAGTCTGCCACCTCCAAACGACATTGAAGGTCTATATGTAATATGTGCTTGGCTGCACAGAAACCCTCCGAACCCAATAACCAAAGATGGAGAGCACCTACTCGTCCGCGGGCTCACAACAGCAACAGCACCAGCAGCCGCAGCCGCAGCCGCCACCTCCGCAGCCAAACCTGCCGCCCGGGTTCCGCTTCCACCCTACGGACGAAGAGCTAGTCGTCCACTATCTCAAGAAAAAGGCCACCGCCGCTCCCCTCCCGGTTGCTATCATCGCTGAAGTCGACCTTTACAAGTTCGACCCCTGGGAGCTCCCAGGTATGCGTGAAATTATAATTCTTGTATTCAACATGTGTATAAAATTATTGCATACAACAAGTGTGTATAATATTATAAACAACAATAAACTGATTATATTATTTGTTTTCTTCTTTTTTTCTTTTTTTCTTTATTTGTGCAGCTAAGGCTACGTTTGGAGAGCAAGAGTGGTATTTTTTCAGTCCTAGGGACCGGAAGTACCCGAACGGAGCGAGACCCAATAGGGCAGCTACTTCCGGGTATTGGAAAGCGACGGGGACTGATAAGCCGGTGCTGACTTCCGGCGATACTCAGAAAGTTGGTGTGAAAAAAGCACTTGTGTTCTATGGAGGAAAACCCCCAAAAGGAATGAAAACCAATTGGATTATGCACGAGTACAGGCTTGCTGATAACAAGCCCAACAAGAAGCCACCTGGGTGTGACTTGGGCAACAAGAACTCCTTGAGGGTAATCCAACACGAAGCACGTGTATAATTAACTGATTAATTGATTAATGATATTTAAATTGGTATTTTGTACCCCGTGGTATAATTGGTACTTGCCTTTTATATGTTAATTTAATTTGAAGATTAGTAAAGTGATTAATATGTTTGTGTTCATGTAGCTTGATGATTGGGTGCTGTGTAGAATTTACAAGAAGAACAACACGCATAGGCCGATGGATCATGAGAGGGAGGATTCCATGGAGGACATAATGGGACCATTGATGCCACCATCCATAAGTCATGTGGGCCACCATCAGAATATGAAGCTGCACTTTCCAAAATCTAATTCGAGTTATGGACCGCCTTTCATGGAAAATGACCAAATATTTTTTGATGGGATAATGAGCAGCACCGACGGATCAGCTTCTACTCATCAGCTGCAACTAAAACGGCCAATAGTTCCATCTTGGTACTGGAATAATCAGGAAGATGATCAGACGGCTGCTGTTCCTTCATCAAGCAAGAGAATACAACTGCACCAATTGGACAATGGTACTAATTCTAATGGTGATGGGATTAATGGTGGTTCTACAAATAACAATTCTTGTTCTATTGCCAATCTACTTTCCGAGCTTCCAGAGACTCCACCATTGCACCAACATGCAGTTCTGGGGTCACTTGGCGACGGTATATTTCAGACGCCATATCAACTGCCTGGAAAGAATTGGTATTCTGAGTCCAATTTGGGATAGAGGGTTGATGAATTTGATGATTTATGG
>Petrel_1
ATTAGAGAAATTTTTCAATATGACAGGAACACAGAGCATAACACCATATATCATTATATTATTAAAAGAACACTTAAAAAAACTTTTCTCCAATTAAATTATGACATACAATGTTCTGATTCGTATTCTAACACTTAAAAAAAACTTTTCTCCAATTAAATTATGACATACAATGTTCTGATTCATATTCCAGCCAAAAATCTCTCGTCCAATTCATCATGTAGTCTCTCCAATGGGTTGTTGGTGGGGTCCTTGGCAAAATTGGTGCTATTTTTGCGCAATAAAAGCATGACAACTTTTTTTTATCGCTTCTGTCAAAAAAAAAAAGCATGACATCTGAAGCGTAATGCTTGTTCCCACCCCAGGCTTATCCGTCTGTATAATTTTGTTGCCTCGTGTGGTCCGTGGGCTCCACGGAACGTCCACCACACGTGTCGACCTTTCTCTCGTTTTCGAATTACACGTGTCGGCCTATCAACGGCCCACTTTTCAGTTCGCTTCGTCCTAGGGTTTTCCATCACCTCCATATCCCCTTTCCCTACCTGTCCCTATGCTAACCACCACACAGTCACTCTCAATCCCATGCACAAAATTAGGCCCTCGCCTTAATCATGGTTAACGAAGTAATTACACATCATATAAAATGGCTAATCTACCCTGATCCCATTACGTGGCCTTGACCATTGGTTCCCTAGTTTAAAAACCATGCAGGCAACTGCAGCGGAATATTGCCCCCTCACATACTTAAAACAGGGGCCCTGCCAGTCTGCCACCTCCAAACGACATTGAAGGTCTATATGTAATATGTGCTTGGCTGCACAGAAACCCTCCGAACCCAATAACCAAGGATGGAGTGCACCGACTCGTCCGCGGGCTCACAACAGCAACAGCACCAGCAGCCGCCACCTCCGCAGCCAAACCTGCCGCCCGGGTTCCGCTTCCACCCGACGGACGAAGAGCTAGTCGTCCACTATCTCAAGAAAAAGGCCACCTCCGCTCCCCTCCCGGTTGCTATCATCGCTGAAGTCGACCTTTACAAGTTCGACCCCTGGGAGCTCCCAGGTATGCGTGAAATTATAATTCTTGTATTCAACATGTGTATAAAATTATTGCATACAACAAGTGTGTATAATATTATCGACAACAATAAACTGATTATATTATTTGTTTTCTTCTTTTTTCCTCTTTTCTTTATTTGTGCAGCTAAGGCTACGTTTGGAGAGCAAGAGTGGTATTTTTTCAGTCCTAGGGACCGGAAGTACCCGAACGGAGCGAGACCCAATAGGGCAGCGACTTCCGGGTATTGGAAAGCGACGGGGACTGATAAGCCGGTGCTGACTTCCGGCGATACTCAGAAAGTTGGTGTGAAAAAAGCACTTGTGTTCTATGGAGGAAAACCCCCAAAAGGAATTAAAACCAATTGGATTATGCACGAGTACAGGCTTGCTGATAACAAGCCCAACAACAAGCCACCTGGGTGTGACTTGGGCAACAAGAAGAACTCCTTGAGGGTAATCCAACACTAAGCACGTGTATAATTAACTGATTAATTGATTAATGATATTTAAATTGGTATTTTGTACCCCATGGTATCATTGGTACTTACCTTTTATTTGTTAATTTAATTTGAAGATTAGTAAATTGATTAATATGTTTGTGTTCATGTAGCTTGATGATTGGGTGCTGTGTAGAATTTACAAGAAGAACAACACGCATAGGCCGATGGATCATGAGAGGGAGGATTCCATGGAGGACATAATGGGACCATTGATGCCACCATCCATAAGTCATGTGGGCCACCATCAGAATATGAAGCTGCACTTTCCAAAATCTAATTCGAGTTATGGACCGCCTATCATGGAAAATGACCAAATATTTTTTGATGGGATAATGAGCAGCACCGACGGATCAGCTTCTACTCATCAGCTGCAACTAAAACGGCCAATAGTTCCATCTTGGTACTGGAATAATCAGGAAGATGATCAGACGGCTGCTGATCCTTCATCAAGCAAGAGAATACAACTGCACCAATTGGACAATGGTACTAATTCTAATGGTGCTGGGATTAATGGTGGTTCTACAAATAACAATTCTAGTTCTATTGCCAATCTACTTTCCCAGCTTCCGCAGACGCCACCATTGCACCAACATGCAGTTCTGGGGTCACTTGGCGACGGTATATTCCGGACGCCATATCAACTGCCTGGAATGAATTGGTATTCTGAGTCCAATTTGGGATAGAGGGTTGATGAATTTGATGATTTATGG
>Petrel_2
ATTAGAGAAATTTTTCAATGTGACAAAAACACAGAGCATAACACCATATATCATTATATTATTAAAAAAACACTTAAAAAAAAAAACTTTTCTCCAATTAAATTATGACATACAATGTTCTGATTCGTATTCTGGCCAAAAATCTCTCGTCCAATTCATCATGTAGTCTCTCCAATGGTTTTTTGGTGGGGTCCTTGGCAAAGTTGGTGGTATTTTTGCGCAATAAAAGCATGACAACTTTTTTTTTTATCGCTTCCGTCAAAAAAAACAGAAAAAAAGCATGACATCTGAAGCATAATGCTTGTTCCCACCCCAGGCTTATCCGTCTATATAATTTTGTTGCCTTGTGTGGTCCGTGGGCCCCACGGAGGTCCACTACACGTGTCGACCTTTCTCTCGTTTTCGAATTACAAGTGTCGGCCTATCAACGGCCCACTTTTCAGTTCGCTTCGTCCTAGGGTTTTCCATCACCGCCATATCCCCTTTCCCTACCTGTCCCTATGCTAACCACCACACAGTCACTCTCAATCCCATGCACAAAATTAGGCCCCCGCCTTAATCATGCTTAACGATGTAATTACACATCATATAAAATGGCTAATCTACCCTGATCCCATTACGGGGCCTTTACCATTGGTTCCCTAGTTTAAAAACCATGCAGGCAACTGCAGCGGAATATTGCCCTCACATGCTTAAAACAGGGGCCCTGCCAGTCTGCCACCTCCAAACGACATTGAAGGTCTATATGTAATATGTGCTTGGCTGCACAGAAACCCTCCGAACCCAATAACCAAAGATGGAGAGCACCTACTCGTCCGCGGGCTCACAACAGCAACAGCACCAGCAGCCGCAGCCGCAGCCGCCACCTCCGCAGCCAAACCTGCCGCCCGGGTTCCGCTTCCACCCTACGGACGAAGAGCTAGTCGTCCACTATCTCAAGAAAAAGGCCACCGCCGCTCCCCTCCCGGTTGCTATCATCGCTGAAGTCGACCTTTACAAGTTCGACCCCTGGGAGCTCCCAGGTATGCGTGAAATTATAATTCTTGTATTCAACATGTGTATAAAATTATTGCATACAACAAGTGTGTATAATATTATAAACAACAATAAACTGATTATATTATTTGTTTTCTTCTTTTTTTCTTTTTTTCTTTATTTGTGCAGCTAAGGCTACGTTTGGAGAGCAAGAGTGGTATTTTTTCAGTCCTAGGGACCGGAAGTACCCGAACGGAGCGAGACCCAATAGGGCAGCTACTTCCGGGTATTGGAAAGCTACGGGGACTGATAAGCCGGTGCTGACTTCCGGCGATACTCAGAAAGTTGGTGTGAAAAAAGCACTTGTGTTCTATGGAGGAAAACCCCCAAAAGGAATGAAAACCAATTGGATTATGCACGAGTACAGGCTTGCTGATAACAAGCCCAACAAGAAGCCACCTGGGTGTGACTTGGGCAACAAGAACTCCTTGAGGGTAATCCAACACGAAGCACGTGTATAATTAACTGATTAATTGATTAATGATATTTAAATTGGTATTTTGTACCCCGTGGTATAATTGGTACTTGCCTTTTATATGTTAATTTAATTTGAAGATTAGTAAATTGATTAATATGTTTGTGTTCATGTAGCTTGATGATTGGGTGCTGTGTAGAATTTACAAGAAGAACAACACGCATAGGCCGATGGATCATGAGAGGGAGGATTCCATGGAGGACATAATGGGACCATTGATGCCACCATCCATAAGTCATGTGGGCCACCATCAGAATATGAAGCTGCACTTTCCAAAATCTAATTCGAGTTATGGACCGCCTTTCATGGAAAATGACCAAATATTTTTTGATGGGATAATGAGCAGCACCGACGGATCAGCTTCTACTCATCAGCTGCAACTAAAACGGCCAATAGTTCCATCTTGGTACTGGAATAATCAGGAAGATGATCAGACGGCTGCTGTTCCTTCATCAAGCAAGAGAATACAACTGCACCAATTGGACAATGGTACTAATTCTAATGGTGATGGGATTAATGGTGGTTCTACAAATAACAATTCTTGTTCTATTGCCAATCTACTTTCCGAGCTTCCAGAGACTCCACCATTGCACCAACATGCAGTTCTGGGGTCACTTGGCGACGGTATATTTCAGACGCCATATCAACTGCCTGGAAAGAATTGGTATTCTGAGTCCAATTTGGGATAGAGGGTTGATGAATTTGATGATTTATGG
>Golden_Delicious
ATTAGAGAAATTTTTCAATGTGACAGGAACACAGAGCATAACACCATATATCATTATATTATTAAAAGAACACTTAAAAAAACTTTTCTCCAATTAAATTATGACATACAATATTCTGATTCGTATTCTAACACTTAAAAAAAACTTTTCTCCAATTAAATTATGACATACAATGTTCTGATTCATATTCCAGCCAAAAATCTCTCGTCCAATTCATCATGTAGTCTCTCCAATGGGTTGTTGGTGGGGTCCTTGGCAAAATTGGTGCTATTTTTGCGCAATAAAAGCATGACAACTTTTTTTTATCGCTTCTGTAAAAAAAAAAAGCATGACATCTGAAGCGTAATGCTTGTTCCCACCCCAGGCTTATCCGTCTGTATAATTTTGTTGCCTCGCGTGGTCCGTGGGCCCCACGGAAGTCCACCACACGTGTCGACCTTTCTCTCGTTTTCGAATTACACGTGTCGGCCTATCAACGGCCCACTTTTCAGTTCGCTTCGTCCTAGGGTTTTCCATCACCTCCATATCCCCTTTCCCTACCTGTCCCTATGCTAACCACCACACAGTCACTCTCAATCCCATGCACAAAATTAGGCCCCCGCCTTAATCATGGTTAACGAAGTAATTACACATCATATAAAATGGCTAATCTACCCTGATCCCATTACGTGGCCTTGACCATTGGTTCCCTAGTTTAAAAACCACGCAGGCAACTGCAGCGGAATATTGCCCCCTCACATACTTAAAACAGGGGCCCTGCCAGTCTGCCACCTCCAAACGACATTGAAGGTCTATATGTAATATGTGCTTGGCTGCACAGAAACCCTCCGAACCCAATAACCAAGGATGGAGTGCACCGACTCGTCCGCGGGCTCACAACAGCAACAGCACCAGCAGCCGCCACCTCCGCAGCCAAACCTGCCGCCCGGGTTCCGCTTCCACCCGACGGACGAAGAGCTAGTCGTCCACTATCTCAAGAAAAAGGCCACCTCCGCTCCCCTCCCGGTTGCTATTATCGCTGAAGTCGACCTTTACAAGTTCGACCCCTGGGAGCTCCCAGGTATGCGTGAAATTATAATTCTTGTATTCAACATGTGTATAAAATTATTGCATACAACAAGTGTGTATAATATTATCGACAACAATAAACTGATTATATTATTTGTTTTCTTCTTTTTTCCTCTTTTCTTTATTTGTGCAGCTAAGGCTACGTTTGGAGAGCAAGAGTGGTATTTTTTCAGTCCTAGGGACCGGAAGTACCCGAACGGAGCGAGACCCAATAGGGCAGCGACTTCCGGGTATTGGAAAGCGACGGGGACTGATAAGCCGGTGCTGACTTCCGGCGATACTCAGAAAGTTGGTGTGAAAAAAGCACTTGTGTTCTATGGAGGAAAACCCCCAAAAGGAATTAAAACCAATTGGATTATGCACGAGTACAGGCTTGCTGATAACAAGCCCAACAACAAGCCACCTGGGTGTGACTTGGGCAACAAGAAGAACTCCATGAGGGTAATCCAACACTAAGCACGTGTATAATTAACTGATTAATTGATTAATGATATTTAAATTGGTTTTTTGTACCCCATGGTATCATTGGTACTTACCTTTTATTTGTTAATTTAATTTGGAGATTAGTAAATTGATTAATATGTTTGTGTTCATGTAGCTTGATGATTGGGTGCTGTGTAGAATTTACAAGAAGAACAACACGCATAGGCCGATGGATCATGAGAGGGAGGATTCCATGGAGGACATAATGGGACCATTGATGCCACCATCCATAAGTCATGTGGGCCACCATCAGAATATGAAGCTGCACTTTCCAAAATCTAATTCGAGTTATGGACCGCCTTTCATGGAAAATGACCAAATATTTTTTGATGGGATAATGAGCAGCACCGACGGATCAGCTTCTACTCATCAGCTGCAACTAAAACGGCCAATAGTTCCATCTTGGTACTGGAATAATCAGGAAGATGATCAGACGGCTGCTGATCCTTCATCAAGCAAGAGAATACAACTGCACCAATTGGACAATGGTACTAATTCTAATGGTGCTGGGATTAATGGTGGTTCTACAAATAACAATTCTAGTTCTATTGCCAATCTACTTTCCCAGCTTCCACAGACGCCACCATTGCACCAACATGCAGTTCTGGGGTCACTTGGCGACGGTATATTCCGGACGCCATATCAACTGCCTGGAATGAATTGGTATTCTGAGTCCAATTTGGGATAGAGGGTTGATGAATTTGATGATTTATGG
>Amri
ATTAGAGAAATTTTTCAATGTGACAGGAACACAGAGCATAACACCATATATCATTATATTATTAAAAGAACACTTAAAAAAACTTTTCTCCAATTAAATTATGACATACAATATTCTGATTCGTATTCTAACACTTAAAAAAAACTTTTCTCCAATTAAATTATGACATACAATGTTCTGATTCATATTCCAGCCAAAAATCTCTCGTCCAATTCATCATGTAGTCTCTCCAATGGGTTGTTGGTGGGGTCCTTGGCAAAATTGGTGCTATTTTTGCGCAATAAAAGCATGACAACTTTTTTTTATCGCTTCTGTCAAAAAAAAAAGCATGACATCTGAAGCGTAATGCTTGTTCCCACCCCAGGCTTATCCGTCTGTATAATTTTGTTGCCTCGTGTGGTCCGTGGGCTCCACGGAACGTCCACCACACGTGTCGACCTTTCTCTCGTTTTCGAATTACACGTGTCGGCCTATCAACGGCCCACTTTTCAGTTCGCTTCGTCCTAGGGTTTTCCATCGCCTCCATATCCCCTTTCCCTACCTGTCCCTATGCTAACCACCACACAGTCACTCTCAATCCCATGCACAAAATTAGGCCCTCGCCTTAATCATGGTTAACGAAGTAATTACACATCATATAAAATGGCTAATCTACCCTGATCCCATTACGTGGCCTTGACCATTGGTTCCCTAGTTTAAAAACCATGCAGGCAACTGCAGCGGAATATTGCCCCCTCACATACTTAAAACAGGGGCCCTGCCAGTCTGCCACCTCCAAACGACATTGAAGGTCTATATGTAATATGTGCTTGGCTGCACAGAAACCCTCCGAACCCAATAACCAAGGATGGAGTGCACCGACTCGTCCGCGGGCTCACAACAGCAACAGCACCAGCAGCCGCCACCTCCGCAGCCAAACCTGCCGCCCGGGTTCCGCTTCCACCCGACGGACGAAGAGCTAGTCGTCCACTATCTCAAGAAAAAGGCCACCTCCGCTCCCCTCCCGGTTGCTATCATCGCTGAAGTCGACCTTTACAAGTTCGACCCCTGGGAGCTCCCAGGTATGCGTGAAATTATAATTCTTGTATTCAACATGTGTATAAAATTATTGCATACAACAAGTGTGTATAATATTATCGACAACAATAAACTGATTATATTATTTGTTTTCTTCTTTTTTCCTCTTTTCTTTATTTGTGCAGCTAAGGCTACGTTTGGAGAGCAAGAGTGGTATTTTTTCAGTCCTAGGGACCGGAAGTACCCGAACGGAGCGAGACCCAATAGGGCAGCGACTTCCGGGTATTGGAAAGCGACGGGGACTGATAAGCCGGTGCTGACTTCCGGCGATACTCAGAAAGTTGGTGTGAAAAAAGCACTTGTGTTCTATGGAGGAAAACCCCCAAAAGGAATTAAAACCAATTGGATTATGCACGAGTACAGGCTTGCTGATAACAAGCCCAACAACAAGCCACCTGGGTGTGACTTGGGCAACAAGAAGAACTCCTTGAGGGTAATCCAACACTAAGCACGTGTATAATTAACTGATTAATTGATTAATGATATTTAAATTGGTATTTTGTACCCCATGGTATCATTGGTACTTACCTTTTATTTGTTAATTTAATTTGAAGATTAGTAAATTGATTAATATGTTTGTGTTCATGTAGCTTGATGATTGGGTGCTGTGTAGAATTTACAAGAAGAACAACACGCATAGGCCGATGGATCATGAGAGGGAGGATTCCATGGAGGACATAATGGGACCATTGATGCCACCATCCATAAGTCATGTGGGCCACCATCAGAATATGAAGCTGCACTTTCCAAAATCTAATTCGAGTTATGGACCGCCTATCATGGAAAATGACCAAATATTTTTTGATGGGATAATGAGCAGCACCGACGGATCAGCTTCTACTCATCAGCTGCAACTAAAACGGCCAATAGTTCCATCTTGGTACTGGAATAATCAGGAAGATGATCAGACGGCTGCTGATCCTTCATCAAGCAAGAGAATACAACTGCACCAATTGGACAATGGTACTAATTCTAATGGTGCTGGGATTAATGGTGGTTCTACAAATAACAATTCTAGTTCTATTGCCAATCTACTTTCCCAGCTTCCACAGACGCCACCATTGCACCAACATGCAGTTCTGGGGTCACTTGGCGACGGTATATTCCGGACGCCATATCAACTGCCTGGAATGAATTGGTATTCTGAGTCCAATTTGGGATAGAGGGTTGATGAATTTGATGATTTATGG
>KAZ_96_07-04
ATTAGAGAAATTTTTCAATGTGACAAAAACACAGAGCATAACACCATATATCATTATATTATTAAAAAAACACTTAAAAAAAAAACTTTTCTCCAATTAAATTATGACATACAATGTTCTGATTCGTATTCTGGCCAAAAATCTCTCGTCCAATTCATCATGTAGTCTCTCCAATGGTTTTTTGGTGGGGTCCTTGGCAAAGTTGGTGGTATTTTTGCGCAATAAAAGCATGACAACTTTTTTTTTTATCGCTTCCGTCAAAAAAAACAGAAAAAAAGCATGACATCTGAAGCATAATGCTTGTTCCCACCCCAGGCTTATCCGTCTATATAATTTTGTTGCCTTGTGTGGTCCGTGGGCCCCACGGAGGTCCACTACACGTGTCGACCTTTCTCTCGTTTTCGAATTACAAGTGTCGGCCTATCAACGGCCCACTTTTCAGTTCGCTTCGTCCTAGGGTTTTCCATCACCGCCATATCCCCTTTCCCTACCTGTCCCTATGCTAACCACCACACAGTCACTCTCAATCCCATGCACAAAATTAGGCCCCCGCCTTAATCATGCTTAACGATGTAATTACACATCATATAAAATGGCTAATCTACCCTGATCCCATTACGGGGCCTTTACCATTGGTTCCCTAGTTTAAAAACCATGCAGGCAACTGCAGCGGAATATTGCCCTCACATGCTTAAAACAGGGGCCCTGCCAGTCTGCCACCTCCAAACGACATTGAAGGTCTATATGTAATATGTGCTTGGCTGCACAGAAACCCTCCGAACCCAATAACCAAAGATGGAGAGCACCTACTCGTCCGCGGGCTCACAACAGCAACAGCTCCAGCAGCCGCAGCCGCAGCCGCCACCTCCGCAGCCAAACCTGCCGCCCGGGTTCCGCTTCCACCCTACGGACGAAGAGCTAGTCGTCCACTATCTCAAGAAAAAGGCCACCGCCGCTCCCCTCCCGGTTGCTATCATCGCTGAAGTCGACCTTTACAAGTTCGACCCCTGGGAGCTCCCAGGTATGCGTGAAATTATAATTCTTGTATTCAACATGTGTATAAAATTATTGCATACAACAAGTGTGTATAATATTATAAACAACAATAAACTGATTATATTATTTGTTTTCTTCTTTTTTTCTTTTTTTCTTTATTTGTGCAGCTAAGGCTACGTTTGGAGAGCAAGAGTGGTATTTTTTCAGTCCTAGGGACCGGAAGTACCCGAACGGAGCGAGACCCAATAGGGCAGCTACTTCCGGGTATTGGAAAGCGACGGGGACTGATAAGCCGGTGCTGACTTCCGGCGATACTCAGAAAGTTGGTGTGAAAAAAGCACTTGTGTTCTATGGAGGAAAACCCCCAAAAGGAATGAAAACCAATTGGATTATGCACGAGTACAGGCTTGCTGATAACAAGCCCAACAAGAAGCCACCTGGGTGTGACTTGGGCAACAAGAACTCCTTGAGGGTAATCCAACACGAAGCACGTGTATAATTAACTGATTAATTGATTAATGATATTTAAATTGGTATTTTGTACCCCGTGGTATAATTGGTACTTGCCTTTTATATGTTAATTTAATTTGAAGATTAGTAAATTGATTAATATGTTTGTGTTCATGTAGCTTGATGATTGGGTGCTGTGTAGAATTTACAAGAAGAACAACACGCATAGGCCGATGGATCATGAGAGGGAGGATTCCATGGAGGACATAATGGGACCATTGATGCCACCATCCATAAGTCATGTGGGCCACCATCAGAATATGAAGCTGCACTTTCCAAAATCTAATTCGAGTTATGGACCGCCTTTCATGGAAAATGACCAAATATTTTTTGATGGGATAATGAGCAGCACCGACGGATCAGCTTCTACTCATCAGCTGCAACTAAAACGGCCAATAGTTCCATCTTGGTACTGGAATAATCAGGAAGATGATCAGACGGCTGCTGTTCCTTCATCAAGCAAGAGAATACAACTGCACCAATTGGACAATGGTACTAATTCTAATGGTGATGGGATTAATGGTGGTTCTACAAATAACAATTCTTGTTCTATTGCCAATCTACTTTCCGAGCTTCCAGAGACTCCACCATTGCACCAACATGCAGTTCTGGGGTCACTTGGCGACGGTATATTTCAGACGCCATATCAACTGCCTGGAAAGAATTGGTATTCTGAGTCCAATTTGGGATAGAGGGTTGATGAATTTGATGATTTATGG
>KAZ_96_06-01P-28
ATTAGAGAAATTTTTCAATGTGACAAAAACACAGAGCATAACACCATATATCATTATATTATTAAAAAAACACTTAAAAAAAAAACTTTTCTCCAATTAAATTATGACATACAATGTTCTGATTCGTATTCTGGCCAAAAATCTCTCGTCCAATTCATCATGTAGTCTCTCCAATGGTTTTTTGGTGGGGTCCTTGGCAAAGTTGGTGGTATTTTTGCGCAATAAAAGCATGACAACTTTTTTTTTTATCGCTTCCGTCAAAAAAAACAGAAAAAAAGCATGACATCTGAAGCATAATGCTTGTTCCCACCCCAGGCTTATCCGTCTATATAATTTTGTTGCCTTGTGTGGTCCGTGGGCCCCACGGAGGTCCACTACACGTGTCGACCTTTCTCTCGTTTTCGAATTACAAGTGTCGGCCTATCAACGGCCCACTTTTCAGTTCGCTTCGTCCTAGGGTTTTCCATCACCGCCATATCCCCTTTCCCTACCTGTCCCTATGCTAACCACCACACAGTCACTCTCAATCCCATGCACAAAATTAGGCCCCCGCCTTAATCATGCTTAACGATGTAATTACACATCATATAAAATGGCTAATCTACCCTGATCCCATTACGGGGCCTTTACCATTGGTTCCCTAGTTTAAAAACCATGCAGGCAACTGCAGCGGAATATTGCCCTCACATGCTTAAAACAGGGGCCCTGCCAGTCTGCCACCTCCAAACGACATTGAAGGTCTATATGTAATATGTGCTTGGCTGCACAGAAACCCTCCGAACCCAATAACCAAAGATGGAGAGCACCTACTCGTCCGCGGGCTCACAACAGCAACAGCACCAGCAGCCGCAGCCGCAGCCGCCACCTCCGCAGCCAAACCTGCCGCCCGGGTTCCGCTTCCACCCTACGGACGAAGAGCTAGTCGTCCACTATCTCAAGAAAAAGGCCACCGCCGCTCCCCTCCCGGTTGCTATCATCGCTGAAGTCGACCTTTACAAGTTCGACCCCTGGGAGCTCCCAGGTATGCGTGAAATTATAATTCTTGTATTCAACATGTGTATAAAATTATTGCATACAACAAGTGTGTATAATATTATAAACAACAATAAACTGATTATATTATTTGTTTTCTTCTTTTTTTTCTTTTTTTCTTTATTTGTGCAGCTAAGGCTACGTTTGGAGAGCAAGAGTGGTATTTTTTCAGTCCTAGGGACCGGAAGTACCCGAACGGAGCGAGACCCAATAGGGCAGCTACTTCCGGGTATTGGAAAGCGACGGGGACTGATAAGCCGGTGCTGACTTCCGGCGATACTCAGAAAGTTGGTGTGAAAAAAGCACTTGTGTTCTATGGAGGAAAACCCCCAAAAGGAATGAAAACCAATTGGATTATGCACGAGTACAGGCTTGCTGATAACAAGCCCAACAAGAAGCCACCTGGGTGTGACTTGGGCAACAAGAACTCCTTGAGGGTAATCCAACACGAAGCACGTGTATAATTAACTGATTAATTGATTAATGATATTTAAATTGGTATTTTGTACCCCGTGGTATAATTGGTACTTGCCTTTTATATGTTAATTTAATTTGAAGATTAGTAAATTGATTAATATGTTTGTGTTCATGTAGCTTGATGATTGGGTGCTGTGTAGAATTTACAAGAAGAACAACACGCATAGGCCGATGGATCATGAGAGGGAGGATTCCATGGAGGACATAATGGGACCATTGATGCCACCATCCATAAGTCATGTGGGCCACCATCAGAATATGAAGCTGCACTTTCCAAAATCTAATTCGAGTTATGGACCGCCTTTCATGGAAAATGACCAAATATTTTTTGATGGGATAATGAGCAGCACCGACGGATCAGCTTCTACTCATCAGCTGCAACTAAAACGGCCAATAGTTCCATCTTGGTACTGGAATAATCAGGAAGATGATCAGACGGCTGCTGTTCCTTCATCAAGCAAGAGAATACAACTGCACCAATTGGACAATGGTACTAATTCTAATGGTGATGGGATTAATGGTGGTTCTACAAATAACAATTCTTGTTCTATTGCCAATCTACTTTCCGAGCTTCCAGAGACTCCACCATTGCACCAACATGCAGTTCTGGGGTCACTTGGCGACGGTATATTTCAGACGCCATATCAACTGCCTGGAAAGAATTGGTATTCTGAGTCCAATTTGGGATAGAGGGTTGATGAATTTGATGATTTATGG
>KAZ_95_18-02P-20
ATTAGAGAAATTTTTCAATGTGACAAAAACACAGAGCATAACACCATATATCATTATATTATTAAAAAAACACTTAAAAAAAAAACTTTTCTCCAATTAAATTATGACATACAATGTTCTGATTCGTATTCTGGCCAAAAATCTCTCGTCCAATTCATCATGTAGTCTCTCCAATGGTTTTTTGGTGGGGTCCTTGGCAAAGTTGGTGGTATTTTTGCGCAATAAAAGCATGACAACTTTTTTTTTTATCGCTTCCGTCAAAAAAAACAGAAAAAAAGCATGACATCTGAAGCATAATGCTTGTTCCCACCCCAGGCTTATCCGTCTATATAATTTTGTTGCCTTGTGTGGTCCGTGGGCCCCACGGAGGTCCACTACACGTGTCGACCTTTCTCTCGTTTTCGAATTACAAGTGTCGGCCTATCAACGGCCCACTTTTCAGTTCGCTTCGTCTTAGGGTTTTCCATCACCGCCATATCCCCTTTCCCTACCTGTCCCTATGCTAACCACCACACAGTCACTCTCAATCCCATGCACAAAATTAGGCCCCCGCCTTAATCATGCTTAACGATGTAATTACACATCATATAAAATGGCTAATCTACCCTGATCCCATTACGGGGCCTTTACCATTGGTTCCCTAGTTTAAAAACCATGCAGGCAACTGCAGCGGAATATTGCCCTCACATGCTTAAAACAGGGGCCCTGCCAGTCTGCCACCTCCAAACGACATTGAAGGTCTATATGTAATATGTGCTTGGCTGCACAGAAACCCTCCGAACCCAATAACCAAAGATGGAGAGCACCTACTCGTCCGCGGGCTCACAACAGCAACAGCACCAGCAGCCGCAGCCGCAGCCGCCACCTCCGCAGCCAAACCTGCCGCCCGGGTTCCGCTTCCACCCTACGGACGAAGAGCTAGTCGTCCACTATCTCAAGAAAAAGGCCACCGCCGCTCCCCTCCCGGTTGCTATCATCGCTGAAGTCGACCTTTACAAGTTCGACCCCTGGGAGCTCCCAGGTATGCGTGAAATTATAATTCTTGTATTCAACATGTGTATAAAATTATTGCATACAACAAGTGTGTATAATATTATAAACAACAATAAACTGATTATATTATTTGTTTTCTTCTTTTTTTCTTTTTTTCTTTATTTGTGCAGCTAAGGCTACGTTTGGAGAGCAAGAGTGGTATTTTTTCAGTCCTAGGGACCGGAAGTACCCGAACGGAGCGAGACCCAATAGGGCAGCTACTTCCGGGTATTGGAAAGCGACGGGGACTGATAAGCCGGTGCTGACTTCCGGCGATACTCAGAAAGTTGGTGTGAAAAAAGCACTTGTGTTCTATGGAGGAAAACCCCCAAAAGGAATGAAAACCAATTGGATTATGCACGAGTACAGGCTTGCTGATAACAAGCCCAACAAGAAGCCACCTGGGTGTGACTTGGGCAACAAGAACTCCTTGAGGGTAATCCAACACGAAGCACGTGTATAATTAACTGATTAATTGATTAATGATATTTAAATTGGTATTTTGTACCCCGTGGTATAATTGGTACTTGCCTTTTATATGTTAATTTAATTTGAAGATTAGTAAATTGATTAATATGTTTGTGTTCATGTAGCTTGATGATTGGGTGCTGTGTAGAATTTACAAGAAGAACAACACGCATAGGCCGATGGATCATGAGAGGGAGGATTCCATGGAGGACATAATGGGACCATTGATGCCACCATCCATAAGTCATGTGGGCCACCATCAGAATATGAAGCTGCACTTTCCAAAATCTAATTCGAGTTATGGACCGCCTTTCATGGAAAATGACCAAATATTTTTTGATGGGATAATGAGCAGCACCGACGGATCAGCTTCTACTCATCAGCTGCAACTAAAACGGCCAATAGTTCCATCTTGGTACTGGAATAATCAGGAAGATGATCAGACGGCTGCTGTTCCTTCATCAAGCAAGAGAATACAACTGCACCAATTGGACAATGGTACTAATTCTAATGGTGATGGGATTAATGGTGGTTCTACAAATAACAATTCTTGTTCTATTGCCAATCTACTTTCCGAGCTTCCAGAGACTCCACCATTGCACCAACATGCAGTTCTGGGGTCACTTGGCGACGGTATATTTCAGACGCCATATCAACTGCCTGGAAAGAATTGGTATTCTGAGTCCAATTTGGGATAGAGGGTTGATGAATTTGATGATTTATGG
>KAZ_96_03-15_1
ATTAGAGAAATTTTTCAATATGACAGGAACACAGAGCATAACACCATATATCATTATATTATTAAAAGAACACTTAAAAAAACTTTTCTCCAATTAAATTATGACATACAATGTTCTGATTCGTATTCTAACACTTAAAAAAAACTTTTCTCCAATTAAATTATGACATACAATGTTCTGATTCATATTCCAGCCAAAAATCTCTCGTCCAATTCATCATGTAGTCTCTCCAATGGGTTGTTGGTGGGGTCCTTGGCAAAATTGGTGCTATTTTTGCGCAATAAAAGCATGACAACTTTTTTTTATCGCTTCTGTCAAAAAAAAAAGCATGACATCTGAAGCGTAATGCTTGTTCCCACCCCAGGCTTATCCGTCTGTATAATTTTGTTGCCTCGTGTGGTCCGTGGGCTCCACGGAACGTCCACCACACGTGTCGACCTTTCTCTCGTTTTCGAATTACACGTGTCGGCCTATCAACGGCCCACTTTTCAGTTCGCTTCGTCCTAGGGTTTTCCATCACCTCCATATCCCCTTTCCCTACCTGTCCCTATGCTAACCACCACACAGTCACTCTCAATCCCATGCACAAAATTAGGCCCTCGCCTTAATCATGGTTAACGAAGTAATTACACATCATATAAAATGGCTAATCTACCCTGATCCCATTACGTGGCCTTGACCATTGGTTCCCTAGTTTAAAAACCATGCAGGCAACTGCAGCGGAATATTGCCCCCTCACATACTTAAAACAGGGGCCCTGCCAGTCTGCCACCTCCAAACGACATTGAAGGTCTATATGTAATATGTGCTTGGCTGCACAGAAACCCTCCGAACCCAATAACCAAGGATGGAGTGCACCGACTCGTCCGCGGGCTCACAACAGCAACAGCACCAGCAGCCGCCACCTCCGCAGCCAAACCTGCCGCCCGGGTTCCGCTTCCACCCGACGGACGAAGAGCTAGTCGTCCACTATCTCAAGAAAAAGGCCACCTCCGCTCCCCTCCCGGTTGCTATCATCGCTGAAGTCGACCTTTACAAGTTCGACCCCTGGGAGCTCCCAGGTATGCGTGAAATTATAATTCTTGTATTCAACATGTGTATAAAATTATTGCATACAACAAGTGTGTATAATATTATCGACAACAATAAACTGATTATATTATTTGTTTTCTTCTTTTTTCCTCTTTTCTTTATTTGTGCAGCTAAGGCTACGTTTGGAGAGCAAGAGTGGTATTTTTTCAGTCCTAGGGACCGGAAGTACCCGAACGGAGCGAGACCCAATAGGGCAGCGACTTCCGGGTATTGGAAAGCGACGGGGACTGATAAGCCGGTGCTGACTTCCGGCGATACTCAGAAAGTTGGTGTGAAAAAAGCACTTGTGTTCTATGGAGGAAAACCCCCAAAAGGAATTAAAACCAATTGGATTATGCACGAGTACAGGCTTGCTGATAACAAGCCCAACAACAAGCCACCTGGGTGTGACTTGGGCAACAAGAAGAACTCCTTGAGGGTAATCCAACACTAAGCACGTGTATAATTAACTGATTAATTGATTAATGATATTTAAATTGGTATTTTGTACCCCATGGTATCATTGGTACTTACCTTTTATTTGTTAATTTAATTTGAAGATTAGTAAATTGATTAATATGTTTGTGTTCATGTAGCTTGATGATTGGGTGCTGTGTAGAATTTACAAGAAGAACAACACGCATAGGCCGATGGATCATGAGAGGGAGGATTCCATGGAGGACATAATGGGACCATTGATGCCACCATCCATAAGTCATGTGGGCCACCATCAGAATATGAAGCTGCACTTTCCAAAATCTAATTCGAGTTATGGACCGCCTATCATGGAAAATGACCAAATATTTTTTGATGGGATAATGAGCAGCACCGACGGATCAGCTTCTACTCATCAGCTGCAACTAAAACGGCCAATAGTTCCATCTTGGTACTGGAATAATCAGGAAGATGATCAGACGGCTGCTGTTCCTTCATCAAGCAAGAGAATACAACTGCACCAATTGGACAATGGTACTAATTCTAATGGTGATGGGATTAATGGTGGTTCTACAAATAACAATTCTTGTTCTATTGCCAATCTACTTTCCGAGCTTCCAGAGACTCCACCATTGCACCAACATGCAGTTCTGGGGTCACTTGGCGACGGTATATTTCAGACGCCATATCAACTGCCTGGAAAGAATTGGTATTCTGAGTCCAATTTGGGATAGAGGGTTGATGAATTTGATGATTTATGG
>KAZ_96_03-15_2
ATTAGAGAAATTTTTCAATGTGACAAAAACACAGAGCATAACACCATATATCATTATATTATTAAAAAAACACTTAAAAAAAAAAACTTTTCTCCAATTAAATTATGACATACAATGTTCTGATTCGTATTCTGGCCAAAAATCTCTCGTCCAATTCATCATGTAGTCTCTCCAATGGTTTTTTGGTGGGGTCCTTGGCAAAGTTGGTGGTATTTTTGCGCAATAAAAGCATGACAACTTTTTTTTTTATCGCTTCCGTCAAAAAAAACAGAAAAAAAGCATGACATCTGAAGCATAATGCTTGTTCCCACCTCAGGCTTATCCGTCTATATAATTTTGTTGCCTTGTGTGGTCCGTGGGCCCCACGGAGGTCCACTACACGTGTCGACCTTTCTCTCGTTTTCGAATTACAAGTGTCGGCCTATCAACGGCCCACTTTTCAGTTCGCTTCGTCCTAGGGTTTTCCATCACCGCCATATCCCCTTTCCCTACCTGTCCCTATGCTAACCACCACACAGTCACTCTCAATCCCATGCACAAAATTAGGCCCCCGCCTTAATCATGCTTAACGATGTAATTACACATCATATAAAATGGCTAATCTACCCTGATCCCATTACGGGGCCTTTACCATTGGTTCCCTAGTTTAAAAACCATGCAGGCAACTGCAGCGGAATATTGCCCTCACATGCTTAAAACAGGGGCCCTGCCAGTCTGCCACCTCCAAACGACATTGAAGGTCTATATGTAATATGTGCTTGGCTGCACAGAAACCCTCCGAACCCAATAACCAAAGATGGAGAGCACCTACTCGTCCGCGGGCTCACAACAGCAACAGCACCAGCAGCCGCAGCCGCAGCCGCCACCTCCGCAGCCAAACCTGCCGCCCGGGTTCCGCTTCCACCCTACGGACGAAGAGCTAGTCGTCCACTATCTCAAGAAAAAGGCCACCGCCGCTCCCCTCCCGGTTGCTATCATCGCTGAAGTCGACCTTTACAAGTTCGACCCCTGGGAGCTCCCAGGTATGCGTGAAATTATAATTCTTGTATTCAACATGTGTATAAAATTATTGCATACAACAAGTGTGTATAATATTATAAACAACAATAAACTGATTATATTATTTGTTTTCTTCTTTTTTTCTTTTTTTCTTTATTTGTGCAGCTAAGGCTACGTTTGGAGAGCAAGAGTGGTATTTTTTCAGTCCTAGGGACCGGAAGTACCCGAACGGAGCGAGACCCAATAGGGCAGCTACTTCCGGGTATTGGAAAGCGACGGGGACTGATAAGCCGGTGCTGACTTCCGGCGATACTCAGAAAGTTGGTGTGAAAAAAGCACTTGTGTTCTATGGAGGAAAACCCCCAAAAGGAATGAAAACCAATTGGATTATGCACGAGTACAGGCTTGCTGATAACAAGCCCAACAAGAAGCCACCTGGGTGTGACTTGGGCAACAAGAACTCCTTGAGGGTAATCCAACACGAAGCACGTGTATAATTAACTGATTAATTGATTAATGATATTTAAATTGGTATTTTGTACCCCGTGGTATAATTGGTACTTGCCTTTTATATGTTAATTTAATTTGAAGATTAGTAAATTGATTAATATGTTTGTGTTCATGTAGCTTGATGATTGGGTGCTGTGTAGAATTTACAAGAAGAACAACACGCATAGGCCGATGGATCATGAGAGGGAGGATTCCATGGAGGACATAATGGGACCATTGATGCCACCATCCATAAGTCATGTGGGCCACCATCAGAATATGAAGCTGCACTTTCCAAAATCTAATTCGAGTTATGGACCGCCTTTCATGGAAAATGACCAAATATTTTTTGATGGGATAATGAGCAGCACCGACGGATCAGCTTCTACTCATCAGCTGCAACTAAAACGGCCAATAGTTCCATCTTGGTACTGGAATAATCAGGAAGATGATCAGACGGCTGCTGTTCCTTCATCAAGCAAGAGAATACAACTGCACCAATTGGACAATGGTACTAATTCTAATGGTGATGGGATTAATGGTGGTTCTACAAATAACAATTCTTGTTCTATTGCCAATCTACTTTCCGAGCTTCCAGAGACTCCACCATTGCACCAACATGCAGTTCTGGGGTCACTTGGCGACGGTATATTTCAGACGCCATATCAACTGCCTGGAAAGAATTGGTATTCTGAGTCCAATTTGGGATAGAGGGTTGATGAATTTGATGATTTATGG
>Zestar_1
ATTAGAGAAATTTTTCAATGTGACAAAAACACAGAGCATAACACCATATATCATTATATTATTAAAAAAACACTTAAAAAAAAAACTTTTCTCCAATTAAATTATGACATACAATGTTCTGATTCGTATTCTGGCCAAAAATCTCTCGTCCAATTCATCATGTAGTCTCTCCAATGGTTTTTTGGTGGGGTCCTTGGCAAAGTTGGTGGTATTTTTGCGCAATAAAAGCATGACAACTTTTTTTTTTATCGCTTCCGTCAAAAAAAACAGAAAAAAAGCATGACATCTGAAGCATAATGCTTGTTCCCACCCCAGGCTTATCCGTCTATATAATTTTGTTGCCTTGTGTGGTCCGTGGGCCCCACGGAGGTCCACTACACGTGTCGACCTTTCTCTCGTTTTCGAATTACAAGTGTCGGCCTATCAACGGCCCACTTTTCAGTTCGCTTCGTCCTAGGGTTTTCCATCACCGCCATATCCCCTTTCCCTACCTGTCCCTATGCTAACCACCACACAGTCACTCTCAATCCCATGCACAAAATTAGGCCCCCGCCTTAATCATGGTTAACGAAGTAATTACACATCATATAAAATGGCTAATCTACCCTGATCCCATTACGTGGCCTTGACCATTGGTTCCCTAGTTTAAAAACCATGCAGGCAACTGCAGCGGAATATTTTCCCCTCACATACTTAAAACAGGGGCCCTGCCAGTCTGCCACCTCCAAACGACATTGAAGGTCTATATGTAATATGTGCTTGGCTGCACAGAAACCCTCCGAACCCAATAACCAAGGATGGAGTGCACCGACTCGTCCGCGGGCTCACAACAGCAACAGCACCAGCAGCCGCCACCTCCGCAGCCAAACCTGCCGCCCGGGTTCCGCTTCCACCCGACGGACGAAGAGCTAGTCGTCCACTATCTCAAGAAAAAGGCCACCTCCGCTCCCCTCCCGGTTGCTATCATCGCTGAAGTCGACCTTTACAAGTTCGACCCCTGGGAGCTCCCAGGTATGCGTGAAATTATAATTCTTGTATTCAACATGTGTATAAAATTATTGCATACAACAAGTGTGTATAATATTATCGACAACAATAAACTGATTATATTATTTGTTTTCTTCTTTTTTCCTCTTTTCTTTATTTGTTCAGCTAAGGCTACGTTTGGAGAGCAAGAGTGGTATTTTTTCAGTCCTAGGGACCGGAAGTACCCGAACGGAGCGAGACCCAATAGGGCAGCGACTTCCGGGTATTGGAAAGCGACGGGGACTGATAAGCCGGTGCTGACTTCCGGCGATACTCAGAAAGTTGGTGTGAAAAAAGCACTTGTGTTCTATGGAGGAAAACCCCCAAAAGGAATTAAAACCAATTGGATTATGCACGAGTACAGGCTTGCTGATAACAAGCCCAACAACAAGCCACCTGGGTGTGACTTGGGCAACAAGAAGAACTCCTTGAGGGTAATCCAACACTAAGCACGTGTATAATTAACTGATTAATTGATTAATGATATTTAAATTGGTTTTTTGTACCCCATGGTATCATTGGTACTTACCTTTTATTTGTTAATTTAATTTGAAGATTAGTAAATTGATTAATATGTTTGTGTTCATGTAGCTTGATGATTGGGTGCTGTGTAGAATTTACAAGAAGAACAACACGCATAGGCCGATGGATCATGAGAGGGAGGATTCCATGGAGGACATAATGGGACCATTGATGCCACCATCCATAAGTCATGTGGGCCACCATCAGAATATGAAGCTGCACTTTCCAAAATCTAATTCGAGTTATGGACCGCCTTTCATGGAAAATGACCAAATATTTTTTGATGGGATAATGAGCAGCACCGACGGATCAGCTTCTACTCATCAGCTGCAACTAAAACGGCCAATAGTTCCATCTTGGTACTGGAATAATCAGGAAGATGATCAGACGGCTGCTGTTCCTTCATCAAGCAAGAGAATACAACTGCACCAATTGGACAATGGTACTAATTCTAATGGTGATGGGATTAATGGTGGTTCTACAAATAACAATTCTTGTTCTATTGCCAATCTACTTTCCGAGCTTCCAGAGACTCCACCATTGCACCAACATGCAGTTCTGGGGTCACTTGGCGACGGTATATTTCAGACGCCATATCAACTGCCTGGAAAGAATTGGTATTCTGAGTCCAATTTGGGATAGAGGGTTGATGAATTTGATGATTTATGG
>Zestar_2
ATTAGAGAAATTTTTCAATGTGACAAAAACACAGAGCATAACACCATATATCATTATATTATTAAAAAAACACTTAAAAAAAAAACTTTTCTCCAATTAAATTATGACATACAATGTTCTGATTCGTATTCTGGCCAAAAATCTCTCGTCCAATTCATCATGTAGTCTCTCCAATGGTTTTTTGGTGGGGTCCTTGGCAAAGTTGGTGGTATTTTTGCGCAATAAAAGCATGACAACTTTTTTTTTTTTATCGCTTCCGTCAAAAAAAACAGAAAAAAAGCATGACATCTGAAGCATAATGCTTGTTCCCACCCCAGGCTTATCCGTCTATATAATTTTGTTGCCTTGTGTGGTCCGTGGGCCCCACGGAGGTCCACTACACGTGTCGACCTTTCTCTCGTTTTCGAATTACAAGTGTCGGCCTATCAACGGCCCACTTTTCAGTTCGCTTCGTCCTAGGGTTTTCCATCACCGCCATATCCCCTTTCCCTACCTGTCCCTATGCTAACCACCACACAGTCACTCTCAATCCCATGCACAAAATTAGGCCCCCGCCTTAATCATGCTTAACGATGTAATTACACATCATATAAAATGGCTAATCTACCCTGATCCCATTACGGGGCCTTTACCATTGGTTCCCTAGTTTAAAAACCATGCAGGCAACTGCAGCGGAATATTGCCCTCACATGCTTAAAACAGGGGCCCTGCCAGTCTGCCACCTCCAAACGACATTGAAGGTCTATATGTAATATGTGCTTGGCTGCACAGAAACCCTCCGAACCCAATAACCAAAGATGGAGAGCACCTACTCGTCCGCGGGCTCACAACAGCAACAGCACCAGCAGCCGCAGCCGCAGCCGCCACCTCCGCAGCCAAACCTGCCGCCCGGGTTCCGCTTCCACCCTACGGACGAAGAGCTAGTCGTCCACTATCTCAAGAAAAAGGCCACCGCCGCTCCCCTCCCGGTTGCTATCATCGCTGAAGTCGACCTTTACAAGTTCGACCCCTGGGAGCTCCCAGGTATGCGTGAAATTATAATTCTTGTATTCAACATGTGTATAAAATTATTGCATACAACAAGTGTGTATAATATTATAAACAACAATAAACTGATTATATTATTTGTTTTCTTCTTTTTTTCTTTTTTTCTTTATTTGTGCAGCTAAGGCTACGTTTGGAGAGCAAGAGTGGTATTTTTTCAGTCCTAGGGACCGGAAGTACCCGAACGGAGCGAGACCCAATAGGGCAGCTACTTCCGGGTATTGGAAAGCGACGGGGACTGATAAGCCGGTGCTGACTTCCGGCGATACTCAGAAAGTTGGTGTGAAAAAAGCACTTGTGTTCTATGGAGGAAAACCCCCAAAAGGAATGAAAACCAATTGGATTATGCACGAGTACAGGCTTGCTGATAACAAGCCCAACAAGAAGCCACCTGGGTGTGACTTGGGCAACAAGAACTCCTTGAGGGTAATCCAACACGAAGCACGTGTATAATTAACTGATTAATTGATTAATGATATTTAAATTGGTATTTTGTACCCCGTGGTATAATTGGTACTTGCCTTTTATATGTTAATTTAATTTGAAGATTAGTAAAGTGATTAATATGTTTGTGTTCATGTAGCTTGATGATTGGGTGCTGTGTAGAATTTACAAGAAGAACAACACGCATAGGCCGATGGATCATGAGAGGGAGGATTCCATGGAGGACATAATGGGACCATTGATGCCACCATCCATAAGTCATGTGGGCCACCATCAGAATATGAAGCTGCACTTTCCAAAATCTAATTCGAGTTATGGACCGCCTTTCATGGAAAATGACCAAATATTTTTTGATGGGATAATGAGCAGCACCGACGGATCAGCTTCTACTCATCAGCTGCAACTAAAACGGCCAATAGTTCCATCTTGGTACTGGAATAATCAGGAAGATGATCAGACGGCTGCTGTTCCTTCATCAAGCAAGAGAATACAACTGCACCAATTGGACAATGGTACTAATTCTAATGGTGATGGGATTAATGGTGGTTCTACAAATAACAATTCTTGTTCTATTGCCAATCTACTTTCCGAGCTTCCAGAGACTCCACCATTGCACCAACATGCAGTTCTGGGGTCACTTGGCGACGGTATATTTCAGACGCCATATCAACTGCCTGGAAAGAATTGGTATTCTGAGTCCAATTTGGGATAGAGGGTTGATGAATTTGATGATTTATGG
