# Supplementary material for: Apple Ripening Is Controlled by a NAC Transcription Factor
Source: Front Genet. 2021 Jun 22;12:671300. doi: 10.3389/fgene.2021.671300 (PMC8258254; doi:10.3389/fgene.2021.671300)
Supplement: Supplementary Figure 1 — Correlations among phenotypes. The distributions of each phenotype are shown as well as dot plots of comparisons between each pair of phenotypes. The results of a Pearson correlation test are provided for each pairwise comparison. [file Data_Sheet_1.zip › Supplementary files/Supp Tables/Table 4.xlsx]

## Sheet: Sheet1
Gene	Efficiency (%)
MdACS1	96.2
MdACS3	81.4
MdACO1	89.3
MdACO2	87.7
MdACO3	93.6
MdNAC18	95.9
MdNAC5	93.7
MdPG1	92.8
MdBG2	90.6
MdAtcin	86.1
MdUBI	85.6
