# Supplementary material for: Apple Ripening Is Controlled by a NAC Transcription Factor
Source: Front Genet. 2021 Jun 22;12:671300. doi: 10.3389/fgene.2021.671300 (PMC8258254; doi:10.3389/fgene.2021.671300)
Supplement: Supplementary Figure 1 — Correlations among phenotypes. The distributions of each phenotype are shown as well as dot plots of comparisons between each pair of phenotypes. The results of a Pearson correlation test are provided for each pairwise comparison. [file Data_Sheet_1.zip › Supplementary files/Supp Tables/Table 5.xlsx]

## Sheet: Sheet1
Primary clade	Secondary clade	Order	Family	Genus	species	Genome Assembly
Eudicots	Rosids	Rosales	Rosaceae	Malus	x domestica	GCF_002114115.1
Eudicots	Rosids	Rosales	Rosaceae	Pyrus	ussuriensis x communis	GCA_008932095.1
Eudicots	Rosids	Rosales	Rosaceae	Prunus	persica	GCF_000346465.2
Eudicots	Rosids	Rosales	Rosaceae	Rosa	chinensis	GCF_002994745.1
Eudicots	Rosids	Rosales	Rosaceae	Fragaria	vesca	GCF_000184155.1
Eudicots	Rosids	Rosales	Rosaceae	Rubus	occidentalis	v1.0.a1
Eudicots	Rosids	Brassicales	Brassicaceae	Arabidopsis	thaliana	TAIR10
Eudicots	Rosids	Brassicales	Caricaceae	Carica	papaya	GCF_000150535.2
Eudicots	Rosids	Malvales	Malvaceae	Theobroma	cacao	GCF_000208745.1
Eudicots	Rosids	Vitales	Vitaceae	Vitis	vinifera	GCF_000003745.3
Eudicots	Asterids	Solanales	Solanaceae	Solanum	lycopersicum	GCF_000188115.4
Eudicots	Asterids	Gentianales	Rubiaceae	Coffea	arabica	GCF 003713225.1
Eudicots	Early-diverging eudicots	Proteales	Nelumbonaceae	Nelumbo	nucifera	GCF_000365185.1
Monocots	Commelinids	Arecales	Arecaceae	Phoenix	dactylifera	GCF_000413155.1
Monocots	Commelinids	Poales	Poaceae	Oryza	sativa	GCF 000005425.2
Magnoliids		Laurales	Lauraceae	Cinnamomum	micranthum	GCA_003546025.1
early-diverging Angiosperms		Amborellales	Amborellaceae	Amborella	trichopoda	GCF_000471905.2
